# Supplementary material for: A C1-symmetric N-heterocyclic carbene catalysed oxidative spiroannulation of isatin-derived enals: highly enantioselective synthesis of spirooxindole δ-lactones
Source: Royal Society of Chemistry journal article supplement (doi:10.1039/c8ra02009d), 2018-01-01
Supplement: c8ra02009d1.pdf [file c8ra02009d1.pdf]

# Supporting Information

## **A C<sub>1</sub>-Symmetric N-Heterocyclic Carbene Catalysed Oxidative Spiroannulation of Isatin-Derived Enals: Highly Enantioselective Synthesis of Spirooxindole $\delta$ -Lactones**

Jun-Bing Lin,<sup>[a],+</sup> Xi-Na Cheng,<sup>[a],+</sup> Xiao-Dong Tian,<sup>[a]</sup> Guo-Qiang Xu,<sup>[a]</sup>

Yong-Chun Luo,<sup>[a]</sup> and Peng-Fei Xu\*<sup>[a]</sup>

*State Key Laboratory of Applied Organic Chemistry and College of  
Chemistry and Chemical Engineering, Lanzhou University, Lanzhou  
730000, China.*

[xupf@lzu.edu.cn](mailto:xupf@lzu.edu.cn)

# Contents

|                                                                    |     |
|--------------------------------------------------------------------|-----|
| A. General Information.....                                        | S2  |
| B. General Procedure for the Synthesis of Spirooxindole 3<br>..... | S3  |
| C. X-ray Crystallographic Data of Product <b>3a</b> .....          | S19 |
| D. NMR Spectra and HPLC Chromatograms .....                        | S20 |

## A. General Information

Chemicals and solvents were either purchased from commercial suppliers or purified by standard techniques. <sup>1</sup>H NMR and <sup>13</sup>C NMR spectra were recorded in CDCl<sub>3</sub> with chemical shifts and were reported in ppm relative to either the residual solvent peak or internal standard (TMS). IR spectra were recorded on FT-IR instrument and are reported in wavenumbers (cm<sup>-1</sup>). HRMS were performed on FTMS mass instrument (ESI). HPLC analysis was conducted on a IC column delta eluting with DCM and *n*-hexane. Optical rotation was measured on a polarimeter with [α]<sub>D</sub> values reported in degrees with the concentration (c) in g/100 mL. Chiral N-heterocyclic carbene catalysts (NHC) <sup>1</sup>, α,β-unsaturated aldehyde <sup>2</sup> **and** 1,3-dicarbonyl compounds <sup>3</sup> were prepared according to the literature procedures.

[1] Lu, H.; Liu, J. Y.; Li, C. G.; Lin, J. B.; Liang, Y. M.; Xu, P. F. *Chem. Commun.* **2015**, *51*, 4473.

[2] Mukaiyama, T.; Ogata, K.; Sato, I.; Hayashi, Y. *Chem. Eur. J.* **2014**, *20*, 13583.

[3] a) Ji, C. Y.; Huang, C. Z.; Wang, N.; Jiang, Y. Z.; Peng, Y. G. *Synlett* **2005**, *6*, 986; b) Bartlett, S. L.; Beaudry, C. M. *J. Org. Chem.* **2011**, *76*, 9852.

## B. General Procedure for the Synthesis of Spirooxindole 3

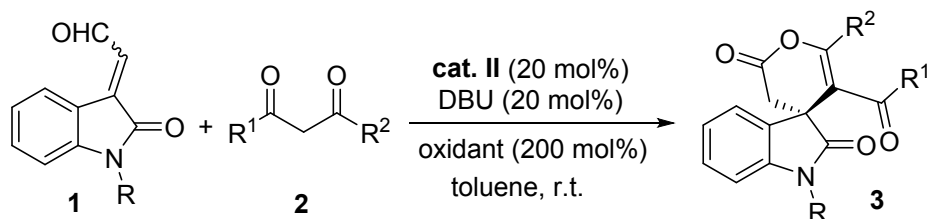

DBU (0.02mmol) was added to the mixture of 2-(1-benzyl-2-oxoindolin-3-ylidene)acetaldehyde **1a** (0.1 mmol), 1-phenylbutane-1,3-dione **2a** (0.1 mmol), chiral catalyst **II** (12.2 mg, 0.02mmol), and oxidant (0.2 mmol) in toluene (1.0 mL) at room temperature under N<sub>2</sub> atmosphere. The reaction was stirred at room temperature until **2a** was consumed as monitored by TLC. The reaction mixture was concentrated in vacuo and purified by flash column chromatography or preparative TLC to afford the corresponding product **3**.

### (S)-5'-benzoyl-1-benzyl-6'-methylspiro[indoline-3,4'-pyran]-2,2'(3'H)-dione (**3a**):

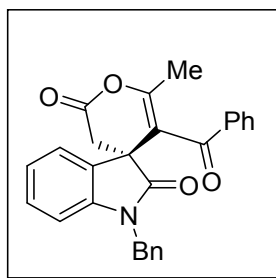

White solid; m.p. 174–176 °C;  $[\alpha]_{25}^D = -8.0$  ( $c=1.0$  in CH<sub>2</sub>Cl<sub>2</sub>); The enantiomeric excess was determined by HPLC with an IC column (CH<sub>2</sub>Cl<sub>2</sub>: *n*-hexane = 70:30), 1.0 mL/min; major enantiomer  $t_R = 11.9$  min, minor enantiomer  $t_R = 27.8$  min; <sup>1</sup>HNMR (400 MHz, CDCl<sub>3</sub>) δ 7.53 (d,  $J = 6.4$  Hz, 2H), 7.51 (t,  $J = 1.2$  Hz, 1H), 7.39 (t,  $J = 8.0$  Hz, 2H), 7.29 (m, 5H), 7.13 (q,  $J = 5.2$  Hz, 2H), 6.97 (m, 1H), 6.63 (d,  $J = 7.6$  Hz, 1H), 4.90 (d,  $J = 16.0$  Hz,

1H), 4.75 (d,  $J = 16.0\text{Hz}$ , 1H), 3.16 (d,  $J = 15.6\text{Hz}$ , 1H), 2.89 (d,  $J = 15.6\text{Hz}$ , 1H), 1.94 (s, 3H);  $^{13}\text{C}$  NMR (100 MHz,  $\text{CDCl}_3$ )  $\delta$  194.5, 176.2, 164.5, 157.8, 142.2, 138.4, 135.2, 133.1, 129.6, 129.3, 128.8, 128.7, 127.7, 127.2, 123.3, 122.6, 115.9, 110.0, 50.0, 44.2, 38.0, 19.6; IR (KBr): 3060, 2924, 1785, 1715, 1649, 1612, 1489, 1467, 1364, 1325, 1181, 1137, 931, 736, 704  $\text{cm}^{-1}$ ; HRMS (ESI)  $m/z$ :  $[\text{M}+\text{Na}]^+$  calcd for  $\text{C}_{27}\text{H}_{21}\text{NO}_4$  446.1363, found 446.1372.

**(S)-1-benzyl-5'-(4-bromobenzoyl)-6'-methylspiro[indoline-3,4'-pyran]-2,2'(3'H)-dione (3b):**

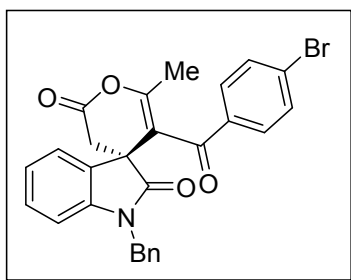

White solid; m.p. 225–228°C;  $[\alpha]_{26}^{\text{D}} = 9.0$  ( $c = 1.0$  in  $\text{CH}_2\text{Cl}_2$ ); The enantiomeric excess was determined by HPLC with an IC column ( $\text{CH}_2\text{Cl}_2$ :  $n$ -hexane = 65:35), 1.0 mL/min; major enantiomer  $t_R = 13.6\text{min}$ , minor enantiomer  $t_R = 28.9\text{min}$ ;  $^1\text{H}$  NMR (400 MHz,  $\text{CDCl}_3$ )  $\delta$  7.54 (q,  $J = 8.8\text{Hz}$ , 4H), 7.31 (q,  $J = 7.2\text{Hz}$ , 5H), 7.15 (q,  $J = 7.6\text{Hz}$ , 2H), 6.99 (t,  $J = 7.2\text{Hz}$ , 1H), 6.66 (d,  $J = 7.6\text{Hz}$ , 1H), 4.88 (d,  $J = 15.6\text{Hz}$ , 1H), 4.78 (d,  $J = 16.0\text{Hz}$ , 1H), 3.15 (d,  $J = 15.6\text{Hz}$ , 1H), 2.88 (d,  $J = 15.6\text{Hz}$ , 1H), 1.96 (s, 3H);  $^{13}\text{C}$  NMR (100 MHz,  $\text{CDCl}_3$ )  $\delta$  193.5, 176.1, 164.3, 157.8, 142.2, 137.0, 135.1, 132.1, 130.3, 129.4, 128.8, 128.4, 127.8, 127.2, 123.4, 122.6, 115.6, 110.0, 50.0, 44.2, 38.0, 19.6. IR (KBr): 3061, 2926, 1786, 1715, 1650, 1488, 1365, 1265, 1180, 1136, 1069, 1009, 930, 738, 700, 491, 458

cm<sup>-1</sup>; HRMS (ESI) m/z: [M+Na]<sup>+</sup> calcd for C<sub>27</sub>H<sub>20</sub>BrNO<sub>4</sub> 524.0468, found 524.0469.

**(S)-1-benzyl-5'-(4-fluorobenzoyl)-6'-methylspiro[indoline-3,4'-pyran]-2,2'(3'H)-dione (3c):**

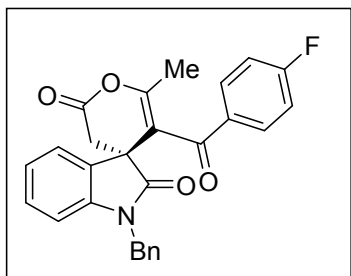

White solid; m.p. 79–81 °C; [ $\alpha$ ]<sub>25</sub> D = -4.0 (*c*=1.0 in CH<sub>2</sub>Cl<sub>2</sub>); The enantiomeric excess was determined by HPLC with an IC column (CH<sub>2</sub>Cl<sub>2</sub>: *n*-hexane = 65:35), 1.0 mL/min; major enantiomer *t*<sub>R</sub> = 13.1min, minor enantiomer *t*<sub>R</sub> = 27.7min. <sup>1</sup>H NMR (400 MHz, CDCl<sub>3</sub>) δ 7.72 (q, *J* = 6.4Hz, 2H), 7.30 (m, 5H), 7.15 (q, *J* = 7.2Hz, 2H), 7.05 (t, *J* = 8.0Hz, 2H), 6.99 (t, *J* = 7.6Hz, 1H), 6.65 (d, *J* = 7.6Hz, 1H), 4.88 (d, *J* = 15.6Hz, 1H), 4.78 (d, *J* = 16.0Hz, 1H), 3.15 (d, *J* = 15.6Hz, 1H), 2.88 (d, *J* = 16.0Hz, 1H), 1.96 (s, 3H); <sup>13</sup>C NMR (100 MHz, CDCl<sub>3</sub>) δ 193.0, 176.1, 164.4, 157.4, 142.2, 135.1, 134.7, 134.6, 131.6, 131.5, 129.5, 129.4, 128.8, 127.8, 127.2, 123.4, 122.6, 116.1, 115.8, 115.6, 110.0, 50.0, 44.3, 38.0, 19.5. IR (KBr): 3062, 2925, 1786, 1714, 1650, 1597, 1489, 1467, 1365, 1323, 1136, 1005, 931, 736, 699, 600 cm<sup>-1</sup>; HRMS (ESI) m/z: [M+Na]<sup>+</sup> calcd for C<sub>27</sub>H<sub>20</sub>FNO<sub>4</sub> 464.1269, found 464.1271.

**(S)-1-benzyl-5'-(4-chlorobenzoyl)-6'-methylspiro[indoline-3,4'-pyran]-2,2'(3'H)-dione (3d):**

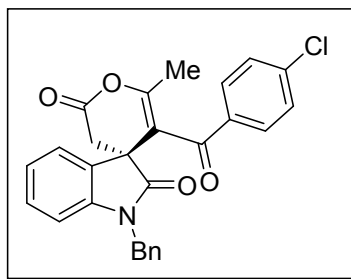

White solid; m.p. 206–208°C;  $[\alpha]_{26}^D = 2.0$  ( $c=1.0$  in  $\text{CH}_2\text{Cl}_2$ ); The enantiomeric excess was determined by HPLC with an IC column ( $\text{CH}_2\text{Cl}_2$ : *n*-hexane = 65:35), 1.0 mL/min; major enantiomer  $t_R = 13.3$  min, minor enantiomer  $t_R = 27.6$  min.  $^1\text{H}$  NMR (400 MHz,  $\text{CDCl}_3$ )  $\delta$  7.63 (d,  $J = 8.4$  Hz, 2H), 7.35 (d,  $J = 8.4$  Hz, 2H), 7.29 (m, 5H), 7.15 (q,  $J = 7.2$  Hz, 2H), 6.99 (t,  $J = 7.6$  Hz, 1H), 6.66 (d,  $J = 7.6$  Hz, 1H), 4.88 (d,  $J = 15.6$  Hz, 1H), 4.78 (d,  $J = 15.6$  Hz, 1H), 3.15 (d,  $J = 16.0$  Hz, 1H), 2.88 (d,  $J = 16.0$  Hz, 1H), 1.96 (s, 3H);  $^{13}\text{C}$  NMR (100 MHz,  $\text{CDCl}_3$ )  $\delta$  193.3, 176.0, 164.3, 157.7, 142.1, 139.8, 136.6, 135.0, 130.2, 129.4, 129.1, 128.8, 127.7, 127.2, 123.3, 122.6, 115.6, 110.0, 50.0, 44.3, 38.0, 19.6. IR (KBr): 3060, 2925, 1787, 1716, 1651, 1488, 1365, 1323, 1265, 1181, 1134, 1012, 931, 738, 701  $\text{cm}^{-1}$ ; HRMS (ESI)  $m/z$ :  $[\text{M}+\text{Na}]^+$  calcd for  $\text{C}_{27}\text{H}_{20}\text{ClNO}_4$  480.0973, found 480.0972.

**(S)-1-benzyl-6'-methyl-5'-(4-nitrobenzoyl)spiro[indoline-3,4'-pyran]-2,2'(3'H)-dione**

**(3e):**

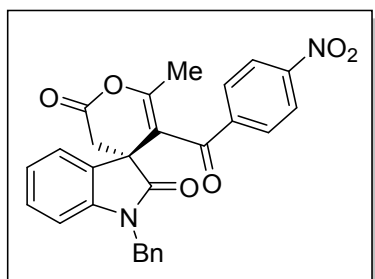

White solid; m.p. 68–70°C;  $[\alpha]_{26}^D = -3.0$  ( $c=1.0$  in  $\text{CH}_2\text{Cl}_2$ ); The enantiomeric excess was determined by HPLC with an IC column ( $\text{CH}_2\text{Cl}_2$ : *n*-hexane = 65:35), 1.0 mL/min;

major enantiomer  $t_R = 17.2$ min, minor enantiomer  $t_R = 28.6$ min.  $^1\text{H}$  NMR (400 MHz,  $\text{CDCl}_3$ )  $\delta$  8.18 (d,  $J = 8.8$ Hz, 2H), 7.79 (d,  $J = 8.8$ Hz, 2H), 7.30 (m, 5H), 7.16 (m, 2H), 7.01 (t,  $J = 7.6$ Hz, 1H), 6.67 (d,  $J = 7.6$ Hz, 1H), 4.87 (d,  $J = 15.6$ Hz, 1H), 4.76 (d,  $J = 15.6$ Hz, 1H), 3.19 (d,  $J = 15.6$ Hz, 1H), 2.88 (d,  $J = 16.0$ Hz, 1H), 1.98 (s, 3H);  $^{13}\text{C}$  NMR (100 MHz,  $\text{CDCl}_3$ )  $\delta$  193.1, 176.0, 163.9, 159.5, 150.1, 143.2, 142.0, 134.9, 129.6, 129.5, 128.9, 127.9, 127.3, 123.9, 123.5, 115.7, 110.1, 49.9, 44.3, 38.1, 19.8. IR (KBr): 3062, 2925, 2854, 2374, 1788, 1715, 1610, 1527, 1467, 1350, 1180, 851, 754, 737, 699 $\text{cm}^{-1}$ ; HRMS (ESI)  $m/z$ :  $[\text{M}+\text{Na}]^+$  calcd for  $\text{C}_{27}\text{H}_{20}\text{N}_2\text{O}_6$  491.1214, found 491.1210.

**(S)-1-benzyl-6'-methyl-5'-(4-(trifluoromethyl)benzoyl)spiro[indoline-3,4'-pyran]-2,2'(3'H)-dione (3f):**

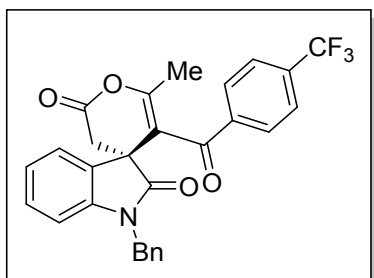

White solid; m.p. 58–60 $^{\circ}\text{C}$ ;  $[\alpha]_{26}^{\text{D}} = -12.0$  ( $c = 1.0$  in  $\text{CH}_2\text{Cl}_2$ ); The enantiomeric excess was determined by HPLC with an IC column ( $\text{CH}_2\text{Cl}_2$ :  $n$ -hexane = 50:50), 1.0 mL/min; major enantiomer  $t_R = 17.6$ min, minor enantiomer  $t_R = 34.9$ min.  $^1\text{H}$  NMR (400 MHz,  $\text{CDCl}_3$ )  $\delta$  7.76 (d,  $J = 8.0$ Hz, 2H), 7.63 (d,  $J = 8.0$ Hz, 2H), 7.28 (m, 5H), 7.16 (t,  $J = 8.0$ Hz, 2H), 7.00 (t,  $J = 7.6$ Hz, 1H), 6.64 (d,  $J = 8.0$ Hz, 1H), 4.89 (d,  $J = 16.0$ Hz, 1H), 4.72 (d,  $J = 15.6$ Hz, 1H), 3.18 (d,  $J = 16.0$ Hz, 1H), 2.89 (d,  $J = 15.6$ Hz, 1H), 1.97 (s, 3H);  $^{13}\text{C}$  NMR (100 MHz,  $\text{CDCl}_3$ )  $\delta$  193.6, 176.1, 164.1, 158.9, 142.1, 141.3, 135.0, 129.5, 129.0, 128.8,



127.8, 127.2, 123.4, 122.5, 115.7, 110.0, 50.0, 44.2, 38.0, 19.7. IR (KBr): 3062, 2926, 1716, 1612, 1468, 1358, 1327, 1175, 1133, 1068, 855, 738, 699  $\text{cm}^{-1}$ ; HRMS (ESI)  $m/z$ :  $[\text{M}+\text{Na}]^+$  calcd for  $\text{C}_{28}\text{H}_{20}\text{F}_3\text{NO}_4$  514.1237, found 514.1241.

**(S)-1-benzyl-6'-methyl-5'-(4-methylbenzoyl)spiro[indoline-3,4'-pyran]-2,2'(3'H)-dione (3g):**

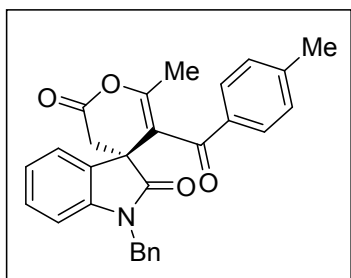

White solid; m.p. 201–204  $^{\circ}\text{C}$ ;  $[\alpha]_{26}^{\text{D}} = -2.0$  ( $c=1.0$  in  $\text{CH}_2\text{Cl}_2$ ); The enantiomeric excess was determined by HPLC with an IC column ( $\text{CH}_2\text{Cl}_2$ : *n*-hexane = 65:35), 1.0 mL/min; major enantiomer  $t_R = 16.0$  min, minor enantiomer  $t_R = 39.2$  min.  $^1\text{H}$  NMR (400 MHz,  $\text{CDCl}_3$ )  $\delta$  7.63 (d,  $J = 8.0$  Hz, 2H), 7.29 (t,  $J = 6.8$  Hz, 5H), 7.19 (d,  $J = 8.0$  Hz, 2H), 7.14 (m, 2H), 6.96 (t,  $J = 7.6$  Hz, 1H), 6.64 (d,  $J = 8.0$  Hz, 1H), 4.89 (d,  $J = 16.0$  Hz, 1H), 4.70 (d,  $J = 16.0$  Hz, 1H), 3.15 (d,  $J = 15.6$  Hz, 1H), 2.89 (d,  $J = 15.6$  Hz, 1H), 2.39 (s, 3H), 1.93 (s, 3H);  $^{13}\text{C}$  NMR (100 MHz,  $\text{CDCl}_3$ )  $\delta$  194.0, 176.2, 164.7, 157.0, 144.3, 142.2, 135.7, 135.2, 129.7, 129.4, 129.2, 129.1, 128.8, 127.6, 127.2, 123.2, 122.5, 115.8, 109.9, 50.1, 44.2, 38.0, 21.7, 19.6. IR (KBr): 3059, 2925, 1785, 1715, 1646, 1607, 1489, 1467, 1325, 1264, 1181, 1136, 931, 736  $\text{cm}^{-1}$ ; HRMS (ESI)  $m/z$ :  $[\text{M}+\text{Na}]^+$  calcd for  $\text{C}_{28}\text{H}_{23}\text{NO}_4$  460.1519, found 460.1516.

**(S)-1-benzyl-5'-(4-(tert-butyl)benzoyl)-6'-methylspiro[indoline-3,4'-pyran]-2,2'(3'H)-**

**dione (3h):**

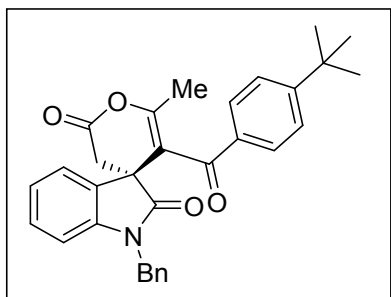

White solid; m.p. 75–76°C,  $[\alpha]_{26}^D = -7.0$  ( $c=1.0$  in  $\text{CH}_2\text{Cl}_2$ ); The enantiomeric excess was determined by HPLC with an IC column ( $\text{CH}_2\text{Cl}_2$ : *n*-hexane = 65:35), 1.0 mL/min; major enantiomer  $t_R = 13.0$  min, minor enantiomer  $t_R = 30.9$  min.  $^1\text{H}$  NMR (400 MHz,  $\text{CDCl}_3$ )  $\delta$  7.64 (d,  $J = 8.4$  Hz, 2H), 7.29 (d,  $J = 8.4$  Hz, 2H), 7.27 (m, 5H), 7.14 (t,  $J = 8.0$  Hz, 2H), 6.97 (t,  $J = 7.6$  Hz, 1H), 6.62 (d,  $J = 8.0$  Hz, 1H), 4.92 (d,  $J = 15.6$  Hz, 1H), 4.73 (d,  $J = 16.0$  Hz, 1H), 3.16 (d,  $J = 15.6$  Hz, 1H), 2.88 (d,  $J = 15.6$  Hz, 1H), 2.96 (s, 3H), 1.33 (s, 9H);  $^{13}\text{C}$  NMR (100 MHz,  $\text{CDCl}_3$ )  $\delta$  194.1, 176.2, 164.7, 157.3, 157.1, 142.2, 135.7, 135.2, 129.8, 129.2, 128.9, 128.8, 127.7, 127.2, 125.7, 123.3, 122.6, 115.9, 109.9, 50.1, 44.2, 38.0, 35.2, 31.1, 19.6. IR (KBr): 2925, 1786, 1718, 1608, 1467, 1363, 1181, 1109, 1016, 933, 853, 737, 698, 551  $\text{cm}^{-1}$ ; HRMS (ESI)  $m/z$ :  $[\text{M}+\text{Na}]^+$  calcd for  $\text{C}_{31}\text{H}_{29}\text{NO}_4$  502.1989, found 502.1992.

**(S)-1-benzyl-5'-(3-methoxybenzoyl)-6'-methylspiro[indoline-3,4'-pyran]-2,2'(3'H)-  
dione (3i):**

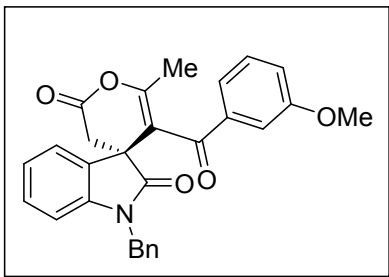

White solid; m.p. 78–80°C;  $[\alpha]_{26}^D = -3.0$  ( $c=1.0$  in  $\text{CH}_2\text{Cl}_2$ ); The enantiomeric excess was determined by HPLC with an IC column ( $\text{CH}_2\text{Cl}_2$ : *n*-hexane = 65:35), 1.0 mL/min; major enantiomer  $t_R = 16.2$  min, minor enantiomer  $t_R = 37.6$  min.  $^1\text{H}$  NMR (400 MHz,  $\text{CDCl}_3$ )  $\delta$  7.29 (t,  $J = 34.4$  Hz, 7H), 7.14 (t,  $J = 6.8$  Hz, 3H), 7.06 (d,  $J = 3.6$  Hz, 1H), 6.98 (t,  $J = 7.6$  Hz, 1H), 6.62 (d,  $J = 8.0$  Hz, 1H), 4.92 (d,  $J = 15.6$  Hz, 1H), 4.73 (d,  $J = 15.6$  Hz, 1H), 3.78 (s, 3H), 3.12 (d,  $J = 16.0$  Hz, 1H), 2.89 (d,  $J = 15.6$  Hz, 1H), 1.97 (s, 3H);  $^{13}\text{C}$  NMR (100 MHz,  $\text{CDCl}_3$ )  $\delta$  194.4, 176.2, 164.5, 159.8, 157.9, 142.3, 139.7, 135.2, 129.7, 129.5, 129.3, 128.8, 128.7, 127.7, 127.2, 123.3, 122.6, 121.6, 119.8, 115.9, 112.6, 110.0, 55.4, 50.0, 44.2, 38.0, 19.5. IR (KBr): 2923, 1786, 1718, 1612, 1466, 1431, 1364, 1317, 1264, 1177, 1129, 1040, 739, 700  $\text{cm}^{-1}$ ; HRMS (ESI)  $m/z$ :  $[\text{M}+\text{Na}]^+$  calcd for  $\text{C}_{28}\text{H}_{23}\text{NO}_5$  476.1468, found 476.1479.

**(S)-1-benzyl-6'-methyl-5'-(3-methylbenzoyl)spiro[indoline-3,4'-pyran]-2,2'(3'H)-dione (3j):**

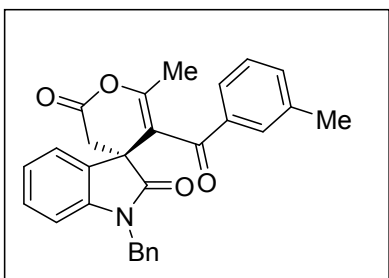

White solid; m.p. 182–184°C;  $[\alpha]_{26}^D = -10.0$  ( $c=1.0$  in  $\text{CH}_2\text{Cl}_2$ ); The enantiomeric excess

was determined by HPLC with an IC column (CH<sub>2</sub>Cl<sub>2</sub>: *n*-hexane = 65:35), 1.0 mL/min; major enantiomer  $t_R = 14.8$ min, minor enantiomer  $t_R = 35.6$ min. <sup>1</sup>H NMR (400 MHz, CDCl<sub>3</sub>) δ 7.48 (t,  $J = 9.2$ Hz, 2H), 7.29 (m, 7H), 7.14 (t,  $J = 7.6$ Hz, 2H), 6.97 (t,  $J = 7.6$ Hz, 1H), 6.62 (d,  $J = 7.6$ Hz, 1H), 4.91 (d,  $J = 15.6$ Hz, 1H), 4.73 (d,  $J = 15.6$ Hz, 1H), 3.15 (d,  $J = 16.0$ Hz, 1H), 2.88 (d,  $J = 16.0$ Hz, 1H), 2.35 (s, 3H), 1.95 (s, 3H); <sup>13</sup>C NMR (100 MHz, CDCl<sub>3</sub>) δ 194.7, 176.2, 164.6, 157.7, 142.2, 138.6, 138.5, 135.2, 133.9, 129.7, 129.2, 129.1, 128.8, 128.5, 127.6, 127.1, 126.1, 123.2, 122.5, 116.1, 109.9, 50.0, 44.2, 38.1, 21.2, 19.6. IR (KBr): 3060, 2924, 1787, 1716, 1648, 1612, 1489, 1467, 1364, 1319, 1179, 1132, 1008, 946, 736, 700 cm<sup>-1</sup>; HRMS (ESI)  $m/z$ : [M+Na]<sup>+</sup> calcd for C<sub>28</sub>H<sub>23</sub>NO<sub>4</sub> 460.1519, found 460.1519.

**(S)-1-benzyl-5'-(3-bromobenzoyl)-6'-methylspiro[indoline-3,4'-pyran]-2,2'(3'H)-dione (3k):**

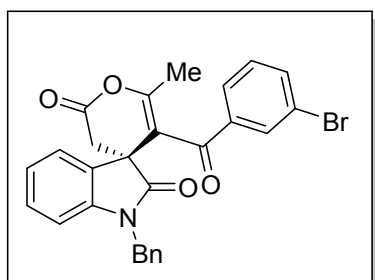

White solid; m.p. 196–198°C;  $[\alpha]_{26}^D = -6.0$  ( $c = 1.0$  in CH<sub>2</sub>Cl<sub>2</sub>); The enantiomeric excess was determined by HPLC with an IC column (CH<sub>2</sub>Cl<sub>2</sub>: *n*-hexane = 65:35), 1.0 mL/min; major enantiomer  $t_R = 12.0$ min, minor enantiomer  $t_R = 24.5$ min. <sup>1</sup>H NMR (400 MHz, CDCl<sub>3</sub>) δ 7.76 (s, 1H), 7.61 (q,  $J = 8.0$ Hz, 2H), 7.29 (m, 6H), 7.15 (m, 2H), 6.99 (t,  $J = 7.6$ Hz, 1H), 6.64 (d,  $J = 8.0$ Hz, 1H), 4.92 (d,  $J = 15.6$ Hz, 1H), 4.73 (d,  $J = 15.6$ Hz, 1H),

3.15 (d,  $J = 16.0\text{Hz}$ , 1H), 2.89 (d,  $J = 15.6\text{Hz}$ , 1H), 1.98 (s, 3H);  $^{13}\text{C}$  NMR (100 MHz,  $\text{CDCl}_3$ )  $\delta$  193.1, 176.0, 164.2, 158.5, 142.1, 140.1, 135.9, 135.0, 131.5, 130.2, 129.4, 129.3, 128.8, 127.7, 127.3, 127.1, 123.3, 122.8, 122.4, 115.6, 110.0, 49.9, 44.2, 37.9, 19.7. IR (KBr): 2925, 1786, 1715, 1656, 1612, 1489, 1467, 1364, 1317, 1180, 1138, 937, 739, 699  $\text{cm}^{-1}$ ; HRMS (ESI)  $m/z$ :  $[\text{M}+\text{Na}]^+$  calcd for  $\text{C}_{27}\text{H}_{20}\text{BrNO}_4$  524.0468, found 524.0470.

**(S)-1-benzyl-5'-(3-chlorobenzoyl)-6'-methylspiro[indoline-3,4'-pyran]-2,2'(3'H)-dione (3I):**

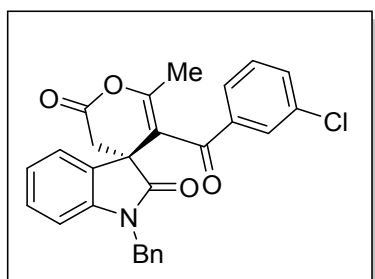

White solid; m.p. 199–203 °C,  $[\alpha]_{26}^{\text{D}} = -8.0$  ( $c=1.0$  in  $\text{CH}_2\text{Cl}_2$ ); The enantiomeric excess was determined by HPLC with an IC column ( $\text{CH}_2\text{Cl}_2$ : *n*-hexane = 65:35), 1.0 mL/min; major enantiomer  $t_R = 11.7\text{min}$ , minor enantiomer  $t_R = 23.9\text{min}$ .  $^1\text{H}$  NMR (400 MHz,  $\text{CDCl}_3$ )  $\delta$  7.61 (s, 1H), 7.56 (d,  $J = 7.6\text{Hz}$ , 1H), 7.49 (d,  $J = 8.8\text{Hz}$ , 1H), 7.30 (m, 6H), 7.15 (q,  $J = 7.2\text{Hz}$ , 2H), 7.00 (t,  $J = 7.6\text{Hz}$ , 1H), 6.64 (d,  $J = 8.0\text{Hz}$ , 1H), 4.92 (d,  $J = 15.6\text{Hz}$ , 1H), 4.74 (d,  $J = 16.0\text{Hz}$ , 1H), 3.16 (d,  $J = 15.6\text{Hz}$ , 1H), 2.88 (d,  $J = 15.6\text{Hz}$ , 1H), 1.98 (s, 3H);  $^{13}\text{C}$  NMR (100 MHz,  $\text{CDCl}_3$ )  $\delta$  193.2, 176.1, 164.3, 158.5, 142.2, 140.0, 135.1, 135.0, 133.0, 130.0, 129.5, 129.4, 128.9, 128.6, 127.8, 127.2, 126.9, 123.4, 122.5, 115.7, 110.1, 50.0, 44.3, 38.0, 19.7. IR (KBr): 2925, 1787, 1715, 1648, 1612, 1488, 1467, 1364, 1316, 1262, 1181, 1137, 940, 738, 698  $\text{cm}^{-1}$ ; HRMS (ESI)  $m/z$ :  $[\text{M}+\text{Na}]^+$  calcd for  $\text{C}_{27}\text{H}_{20}\text{ClNO}_4$

480.0973, found 480.0974.

**(S)-1-benzyl-5'-(3-fluorobenzoyl)-6'-methylspiro[indoline-3,4'-pyran]-2,2'(3'H)-dione (3m):**

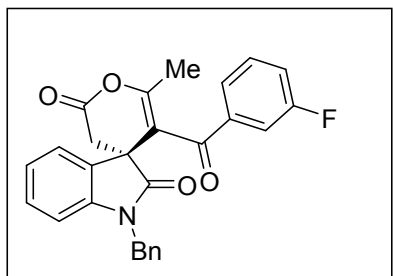

White solid; m.p. 214–215°C,  $[\alpha]_{26}^D = -6.0$  ( $c=1.0$  in  $\text{CH}_2\text{Cl}_2$ ); The enantiomeric excess was determined by HPLC with an IC column ( $\text{CH}_2\text{Cl}_2$ : *n*-hexane = 65:35), 1.0 mL/min; major enantiomer  $t_R = 12.5$ min, minor enantiomer  $t_R = 25.3$ min.  $^1\text{H}$  NMR (400 MHz,  $\text{CDCl}_3$ )  $\delta$  7.50 (d,  $J = 7.6$ Hz, 1H), 7.37 (m, 2H), 7.29 (m, 5H), 7.21 (q,  $J = 1.6$ Hz, 1H), 7.15 (q,  $J = 7.2$ Hz, 2H), 6.99 (t,  $J = 7.2$ Hz, 1H), 6.65 (d,  $J = 8.0$ Hz, 1H), 4.91 (d,  $J = 16.0$ Hz, 1H), 4.77 (d,  $J = 15.6$ Hz, 1H), 3.17 (d,  $J = 16.0$ Hz, 1H), 2.88 (d,  $J = 15.6$ Hz, 1H), 1.97 (s, 3H);  $^{13}\text{C}$  NMR (100 MHz,  $\text{CDCl}_3$ )  $\delta$  193.2, 176.1, 164.3, 158.3, 142.2, 140.5, 140.4, 135.1, 130.5, 130.4, 129.5, 129.4, 128.8, 127.7, 127.2, 124.7, 124.6, 123.4, 122.5, 120.3, 120.1, 115.7, 115.5, 115.2, 110.0, 50.0, 44.2, 38.0, 19.6. IR (KBr): 3420, 3064, 2924, 1789, 1714, 1651, 1364, 1316, 1266, 1177, 1129, 1005, 735, 700  $\text{cm}^{-1}$ ; HRMS (ESI)  $m/z$ :  $[\text{M}+\text{Na}]^+$  calcd for  $\text{C}_{27}\text{H}_{20}\text{FNO}_4$  464.1269, found 464.1272.

**(S)-1-benzyl-6'-methyl-5'-(3-nitrobenzoyl)spiro[indoline-3,4'-pyran]-2,2'(3'H)-dione (3n):**

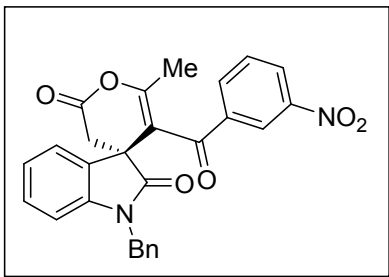

Yellow solid; m.p. 76–78 °C,  $[\alpha]_{26}^D = -16.0$  ( $c=1.0$  in  $\text{CH}_2\text{Cl}_2$ ); The enantiomeric excess was determined by HPLC with an IC column ( $\text{CH}_2\text{Cl}_2$ : *n*-hexane = 65:35), 1.0 mL/min; major enantiomer  $t_R = 22.0$  min, minor enantiomer  $t_R = 42.3$  min.  $^1\text{H}$  NMR (400 MHz,  $\text{CDCl}_3$ )  $\delta$  8.43 (s, 1H), 8.36 (d,  $J = 8.4$  Hz, 1H), 8.00 (d,  $J = 8.0$  Hz, 1H), 7.58 (t,  $J = 8.0$  Hz, 1H), 7.30 (m, 5H), 7.17 (t,  $J = 8.8$  Hz, 2H), 7.01 (t,  $J = 7.6$  Hz, 1H), 6.66 (t,  $J = 8.0$  Hz, 1H), 4.87 (d,  $J = 15.6$  Hz, 1H), 4.73 (d,  $J = 15.6$  Hz, 1H), 3.22 (d,  $J = 15.6$  Hz, 1H), 2.88 (d,  $J = 16.0$  Hz, 1H), 2.00 (s, 3H);  $^{13}\text{C}$  NMR (100 MHz,  $\text{CDCl}_3$ )  $\delta$  192.3, 175.9, 163.9, 159.2, 148.3, 142.0, 139.7, 134.9, 134.2, 133.9, 130.0, 129.6, 129.3, 128.9, 127.8, 127.6, 127.3, 127.2, 123.5, 122.5, 115.4, 110.1, 50.0, 44.2, 38.0, 19.8. IR (KBr): 2924, 1788, 1714, 1612, 1532, 1467, 1352, 1181, 1143, 721, 698, 633, 554  $\text{cm}^{-1}$ ; HRMS (ESI)  $m/z$ :  $[\text{M}+\text{H}]^+$  calcd for  $\text{C}_{27}\text{H}_{20}\text{N}_2\text{O}_6$  469.1394, found 469.1402.

**(S)-1-benzyl-6'-methyl-5'-(thiophene-2-carbonyl)spiro[indoline-3,4'-pyran]-**

**2,2'(3'H)-dione (3o):**

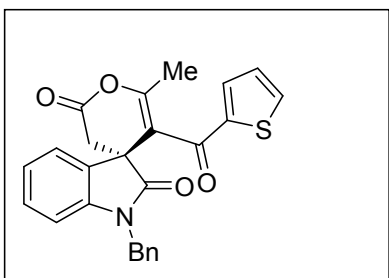

Yellow solid; m.p. 86–88°C,  $[\alpha]_{26}^D = 20.0$  ( $c=1.0$  in  $\text{CH}_2\text{Cl}_2$ ); The enantiomeric excess was determined by HPLC with an IC column ( $\text{CH}_2\text{Cl}_2$ :  $n$ -hexane = 90:10), 1.0 mL/min; major enantiomer  $t_R = 8.1$  min, minor enantiomer  $t_R = 20.6$  min.  $^1\text{H}$  NMR (400 MHz,  $\text{CDCl}_3$ )  $\delta$  7.55 (d,  $J = 7.6$  Hz, 2H), 7.21 (m, 5H), 7.07 (t,  $J = 8.0$  Hz, 2H), 6.97 (t,  $J = 4.4$  Hz, 1H), 6.89 (t,  $J = 7.6$  Hz, 1H), 6.57 (d,  $J = 8.0$  Hz, 1H), 4.81 (d,  $J = 15.6$  Hz, 1H), 4.75 (d,  $J = 16.0$  Hz, 1H), 3.00 (d,  $J = 15.6$  Hz, 1H), 2.86 (d,  $J = 16.0$  Hz, 1H), 2.00 (s, 3H);  $^{13}\text{C}$  NMR (100 MHz,  $\text{CDCl}_3$ )  $\delta$  185.4, 175.8, 164.5, 155.9, 144.1, 142.3, 135.3, 135.1, 134.2, 129.4, 128.9, 128.8, 128.2, 127.7, 127.2, 123.3, 123.0, 115.5, 109.9, 49.9, 44.2, 37.8, 19.5. IR (KBr): 3366, 2924, 2372, 1784, 1710, 1607, 1464, 1410, 1356, 1262, 1178, 1126, 737, 663  $\text{cm}^{-1}$ ; HRMS (ESI)  $m/z$ :  $[\text{M}+\text{Na}]^+$  calcd for  $\text{C}_{25}\text{H}_{19}\text{NO}_4\text{S}$  452.0927, found 452.0937.

**(S)-5'-acetyl-1-benzyl-6'-methylspiro[indoline-3,4'-pyran]-2,2'(3'H)-dione (3p):**

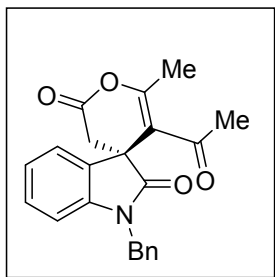

White solid; m.p. 144–146°C,  $[\alpha]_{26}^D = -111.0$  ( $c=1.0$  in  $\text{CH}_2\text{Cl}_2$ ); The enantiomeric excess was determined by HPLC with an IC column ( $\text{CH}_2\text{Cl}_2$ :  $n$ -hexane = 90:10), 1.0 mL/min; major enantiomer  $t_R = 6.8$  min, minor enantiomer  $t_R = 14.1$  min.  $^1\text{H}$  NMR (400 MHz,  $\text{CDCl}_3$ )  $\delta$  7.36 (m, 4H), 7.29 (d,  $J = 7.2$  Hz, 1H), 7.19 (t,  $J = 7.6$  Hz, 1H), 7.05 (d,  $J = 7.2$  Hz, 1H), 6.99 (t,  $J = 7.6$  Hz, 1H), 6.76 (d,  $J = 7.6$  Hz, 1H), 4.97 (s, 2H), 3.12 (d,  $J = 15.6$  Hz, 1H), 2.63 (d,  $J = 15.6$  Hz, 1H), 2.43 (s, 3H), 2.15 (s, 3H);  $^{13}\text{C}$  NMR (100 MHz,



CDCl<sub>3</sub>)  $\delta$  196.1, 176.7, 164.3, 160.4, 141.8, 135.3, 129.9, 129.3, 128.8, 127.8, 127.3, 123.2, 122.3, 119.3, 110.1, 49.5, 44.3, 38.4, 30.9, 19.7. IR (KBr): 3300, 2925, 1786, 1715, 1610, 1489, 1466, 1359, 1311, 1178, 736, 700, 584, 495 cm<sup>-1</sup>; HRMS (ESI) m/z: [M+Na]<sup>+</sup> calcd for C<sub>22</sub>H<sub>19</sub>NO<sub>4</sub> 384.1206, found 384.1210.

**(S)-5'-benzoyl-1,6'-dimethylspiro[indoline-3,4'-pyran]-2,2'(3'H)-dione (3q):**

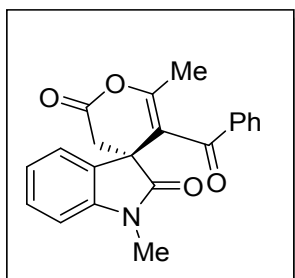

White solid; m.p. 176–178 °C, [ $\alpha$ ]<sub>26</sub> D = -40.0 (*c* = 1.0 in CH<sub>2</sub>Cl<sub>2</sub>); The enantiomeric excess was determined by HPLC with an IC column (CH<sub>2</sub>Cl<sub>2</sub>: *n*-hexane = 80:20), 1.0 mL/min; major enantiomer *t<sub>R</sub>* = 17.9min, minor enantiomer *t<sub>R</sub>* = 27.5min. <sup>1</sup>H NMR (400 MHz, CDCl<sub>3</sub>)  $\delta$  7.56 (d, *J* = 7.2Hz, 2H), 7.48 (t, *J* = 7.6Hz, 1H), 7.35 (t, *J* = 7.6Hz, 2H), 7.26 (t, *J* = 8.0Hz, 1H), 7.15 (d, *J* = 7.6Hz, 1H), 7.02 (t, *J* = 7.6Hz, 1H), 6.72 (d, *J* = 7.6Hz, 1H), 3.08 (d, *J* = 16.8Hz, 4H), 2.84 (d, *J* = 16.0Hz, 1H), 1.96 (s, 3H); <sup>13</sup>C NMR (100 MHz, CDCl<sub>3</sub>)  $\delta$  194.9, 176.0, 164.6, 157.9, 143.1, 138.4, 132.9, 129.4, 128.5, 128.4, 123.3, 122.6, 116.2, 108.7, 49.7, 37.5, 26.5, 19.4. IR (KBr): 3297, 2925, 1786, 1714, 1612, 1469, 1374, 1325, 1141, 1089, 932, 753, 705, 585, 542 cm<sup>-1</sup>; HRMS (ESI) m/z: [M+Na]<sup>+</sup> calcd for C<sub>21</sub>H<sub>17</sub>NO<sub>4</sub> 370.1050, found 370.1047.

**(S)-1-allyl-5'-benzoyl-6'-methylspiro[indoline-3,4'-pyran]-2,2'(3'H)-dione (3r):**

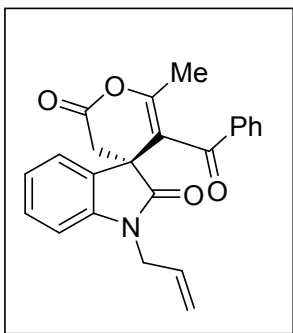

White solid; m.p. 169–172 °C,  $[\alpha]_{26}^D = -12.0$  ( $c=1.0$  in  $\text{CH}_2\text{Cl}_2$ ); The enantiomeric excess was determined by HPLC with an IC column ( $\text{CH}_2\text{Cl}_2$ : *n*-hexane = 70:30), 1.0 mL/min; major enantiomer  $t_R = 15.2$  min, minor enantiomer  $t_R = 42.3$  min.  $^1\text{H}$  NMR (400 MHz,  $\text{CDCl}_3$ )  $\delta$  7.63 (d,  $J = 7.6$  Hz, 2H), 7.51 (t,  $J = 7.6$  Hz, 1H), 7.38 (t,  $J = 7.6$  Hz, 2H), 7.22 (d,  $J = 8.0$  Hz, 1H), 7.15 (d,  $J = 7.2$  Hz, 1H), 7.01 (t,  $J = 7.6$  Hz, 1H), 6.77 (d,  $J = 7.6$  Hz, 1H), 5.75 (m, 1H), 5.24 (q,  $J = 12.8$  Hz, 2H), 4.25 (d,  $J = 5.2$  Hz, 2H), 3.11 (d,  $J = 16.0$  Hz, 1H), 2.85 (d,  $J = 15.6$  Hz, 1H), 1.93 (s, 3H);  $^{13}\text{C}$  NMR (100 MHz,  $\text{CDCl}_3$ )  $\delta$  194.6, 175.8, 164.6, 157.8, 142.3, 138.5, 133.1, 130.8, 129.6, 129.3, 128.7, 128.6, 123.2, 122.5, 117.9, 116.0, 109.8, 49.8, 42.7, 37.8, 19.5. IR (KBr): 3059, 2925, 1785, 1711, 1646, 1466, 1363, 1264, 1184, 1133, 1001, 930, 739, 704  $\text{cm}^{-1}$ ; HRMS (ESI)  $m/z$ :  $[\text{M}+\text{Na}]^+$  calcd for  $\text{C}_{23}\text{H}_{19}\text{NO}_4$  396.1206, found 396.1209.

**(S)-5'-benzoyl-1-butyl-6'-methylspiro[indoline-3,4'-pyran]-2,2'(3'H)-dione (3s):**

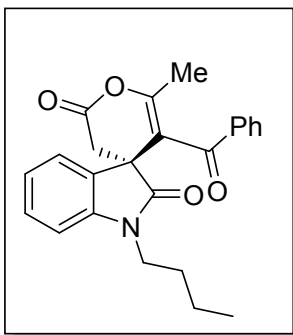

White solid; m.p. 207–210°C,  $[\alpha]_{26}^D = -7.0$  ( $c=1.0$  in  $\text{CH}_2\text{Cl}_2$ ); The enantiomeric excess was determined by HPLC with an IC column ( $\text{CH}_2\text{Cl}_2$ : *n*-hexane = 70:30), 1.0 mL/min; major enantiomer  $t_R = 10.8$ min, minor enantiomer  $t_R = 33.2$ min.  $^1\text{H}$  NMR (400 MHz,  $\text{CDCl}_3$ )  $\delta$  7.62 (t,  $J = 7.2$ Hz, 2H), 7.50 (t,  $J = 7.6$ Hz, 1H), 7.37 (t,  $J = 7.6$ Hz, 2H), 7.26 (m, 2H)(including  $\text{CDCl}_3$ ), 7.15 (d,  $J = 6.8$ Hz, 1H), 7.01 (t,  $J = 7.6$ Hz, 1H), 6.78 (d,  $J = 7.6$ Hz, 1H), 3.59 (m, 2H), 3.09 (d,  $J = 15.6$ Hz, 1H), 2.82 (d,  $J = 16.0$ Hz, 1H), 1.93 (s, 3H), 1.57 (m, 2H), 1.34 (m, 2H), 0.93 (t,  $J = 7.6$ Hz, 3H);  $^{13}\text{C}$  NMR (100 MHz,  $\text{CDCl}_3$ )  $\delta$  194.6, 175.9, 164.7, 157.6, 142.6, 138.4, 133.0, 129.8, 129.3, 128.7, 128.6, 123.0, 122.7, 116.1, 109.1, 49.8, 40.2, 37.9, 29.2, 20.1, 19.4, 13.7. IR (KBr): 3408, 2929, 1786, 1711, 1649, 1611, 1466, 1364, 1324, 1189, 1134, 929, 737, 640  $\text{cm}^{-1}$ ; HRMS (ESI)  $m/z$ :  $[\text{M}+\text{Na}]^+$  calcd for  $\text{C}_{24}\text{H}_{23}\text{NO}_4$  412.1519, found 412.1526.

**(S)-5'-benzoyl-1-benzyl-6'-phenylspiro[indoline-3,4'-pyran]-2,2'(3'H)-dione (3t):**

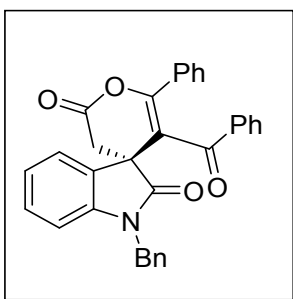

White solid; m.p. 88–90°C,  $[\alpha]_{26}^D = -16.0$  ( $c=1.0$  in  $\text{CH}_2\text{Cl}_2$ ); The enantiomeric excess was determined by HPLC with an IC column ( $\text{CH}_2\text{Cl}_2$ : *n*-hexane = 90:10), 1.0 mL/min; major enantiomer  $t_R = 6.5$  min, minor enantiomer  $t_R = 7.8$  min.  $^1\text{H}$  NMR (400 MHz,  $\text{CDCl}_3$ )  $\delta$  7.56 (d,  $J = 7.2$  Hz, 2H), 7.33 (m, 6H), 7.26 (m, 3H), 7.15 (t,  $J = 10.4$  Hz, 2H), 7.10 (d,  $J = 8.4$  Hz, 4H), 6.99 (t,  $J = 7.6$  Hz, 1H), 6.70 (d,  $J = 8.0$  Hz, 1H), 4.91 (t,  $J = 16.4$  Hz, 2H), 3.41 (d,  $J = 16.4$  Hz, 1H), 3.00 (d,  $J = 16.4$  Hz, 1H);  $^{13}\text{C}$  NMR (100 MHz,  $\text{CDCl}_3$ )  $\delta$  194.6, 175.9, 164.7, 157.9, 142.2, 137.4, 135.2, 132.6, 131.8, 130.8, 129.7, 129.4, 129.2, 129.1, 128.8, 128.1, 128.0, 127.7, 127.2, 123.4, 122.7, 115.8, 110.1, 50.9, 44.3, 38.2. IR (KBr): 3060, 2926, 1786, 1716, 1649, 1612, 1467, 1365, 1180, 1105, 1060, 911, 737, 696  $\text{cm}^{-1}$ ; HRMS (ESI)  $m/z$ :  $[\text{M}+\text{Na}]^+$  calcd for  $\text{C}_{32}\text{H}_{23}\text{NO}_4$  508.1519, found 508.1519.

### C. X-ray Crystallographic Data of Product 3a (CCDC 1010784 )

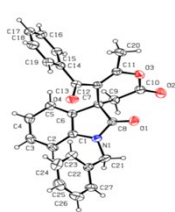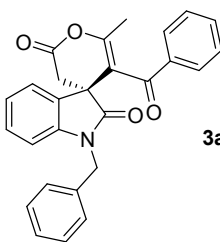

**3a**

A Cu target was used when performing XRD experiment

|                    |                                          |                                          |
|--------------------|------------------------------------------|------------------------------------------|
| Bond precision:    | C-C = 0.0036 Å                           | Wavelength=1.54180                       |
| Cell:              | a=11.1093(2)                             | b=12.6235(3)                             |
|                    | alpha=90                                 | beta=90                                  |
|                    |                                          | c=15.3660(3)                             |
|                    |                                          | gamma=90                                 |
| Temperature: 293 K |                                          |                                          |
|                    | Calculated                               | Reported                                 |
| Volume             | 2154.90(8)                               | 2154.91(8)                               |
| Space group        | P 21 21 21                               | P 21 21 21                               |
| Hall group         | P 2ac 2ab                                | P 2ac 2ab                                |
| Moiety formula     | $\text{C}_{27}\text{H}_{21}\text{N O}_4$ | $\text{C}_{27}\text{H}_{21}\text{N O}_4$ |

|                               |                                                  |                                                  |
|-------------------------------|--------------------------------------------------|--------------------------------------------------|
| Sum formula                   | C <sub>27</sub> H <sub>21</sub> N O <sub>4</sub> | C <sub>27</sub> H <sub>21</sub> N O <sub>4</sub> |
| Mr                            | 423.45                                           | 423.45                                           |
| Dx,g cm-3                     | 1.305                                            | 1.305                                            |
| Z                             | 4                                                | 4                                                |
| Mu (mm-1)                     | 0.711                                            | 0.711                                            |
| F000                          | 888.0                                            | 888.0                                            |
| F000'                         | 890.75                                           |                                                  |
| h,k,lmax                      | 13,15,18                                         | 13,15,18                                         |
| Nref                          | 4143[ 2357]                                      | 4052                                             |
| Tmin,Tmax                     | 0.815,0.861                                      | 0.629,1.000                                      |
| Tmin'                         | 0.802                                            |                                                  |
| Correction method= MULTI-SCAN |                                                  |                                                  |
| Data completeness=            | 1.72/0.98                                        | Theta(max)= 70.683                               |
| R(reflections)=               | 0.0418( 3898)                                    | wR2(reflections)= 0.1119( 4052)                  |
| S = 1.040                     | Npar= 290                                        |                                                  |

## D. NMR Spectra and HPLC Chromatograms

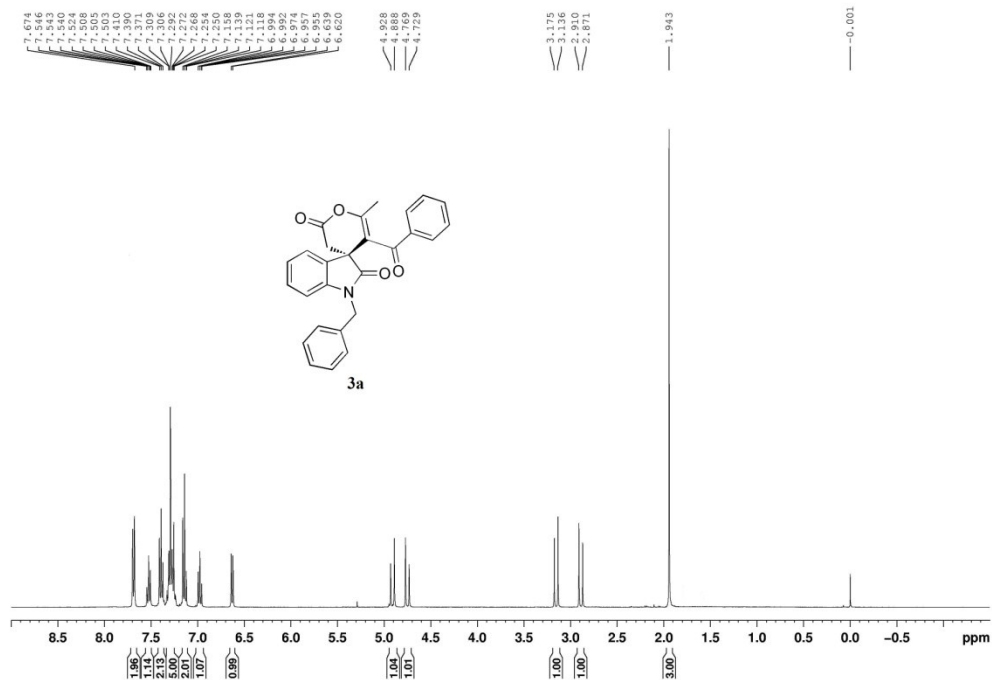

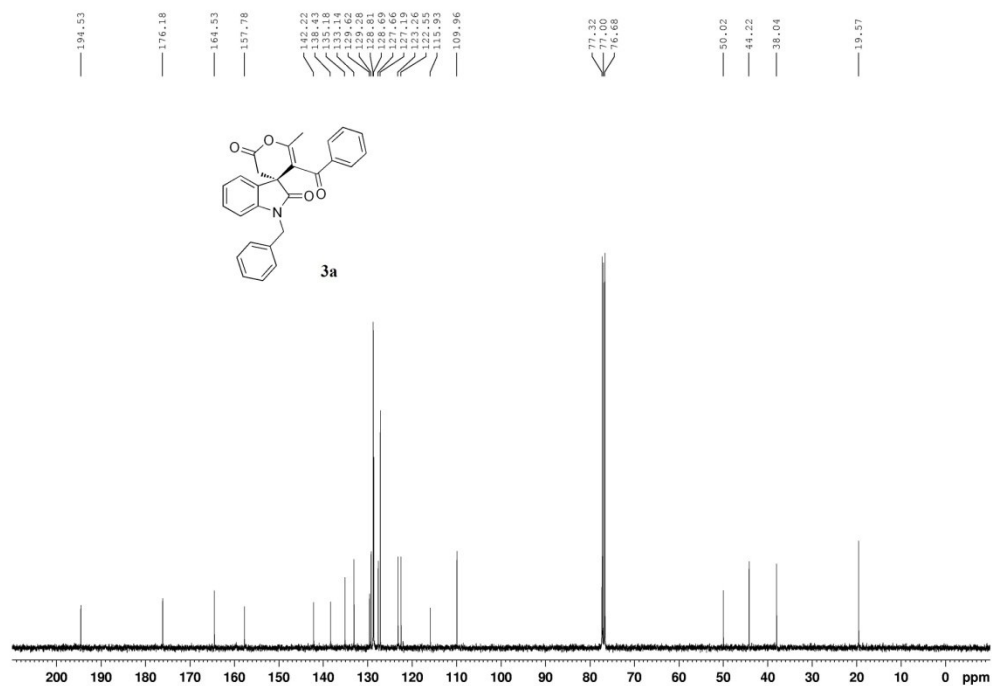

HPLC analysis of **3a** using chiral IC Column ( $\text{CH}_2\text{Cl}_2$ : *n*-hexane = 70:30, 1.0 mL/min)

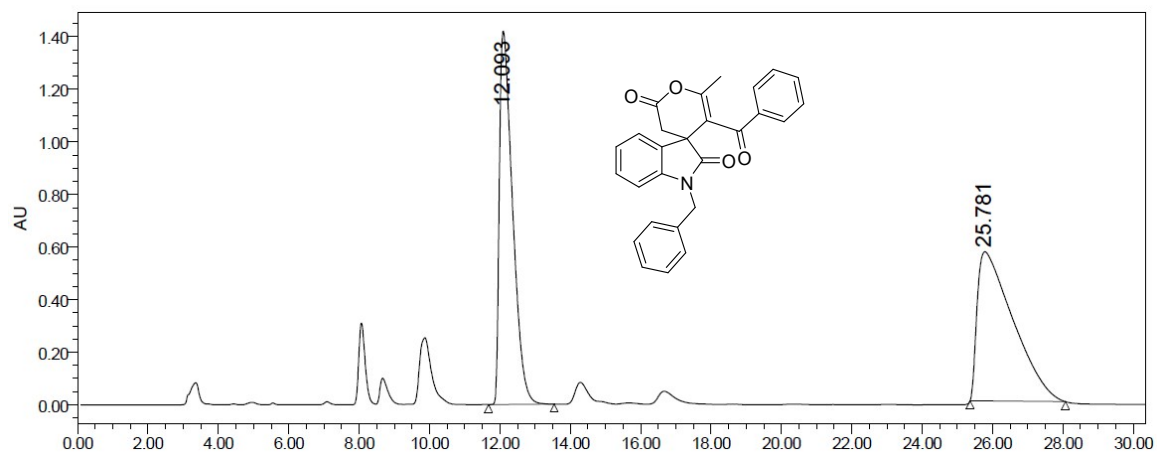

| Peak | Retention time (min) | Peak area (mAU*s) | Peak height (mAU) | Peak area (%) |
|------|----------------------|-------------------|-------------------|---------------|
| 1    | 12.093               | 3694596           | 1419882           | 47.88         |
| 2    | 25.781               | 40225708          | 567292            | 52.12         |

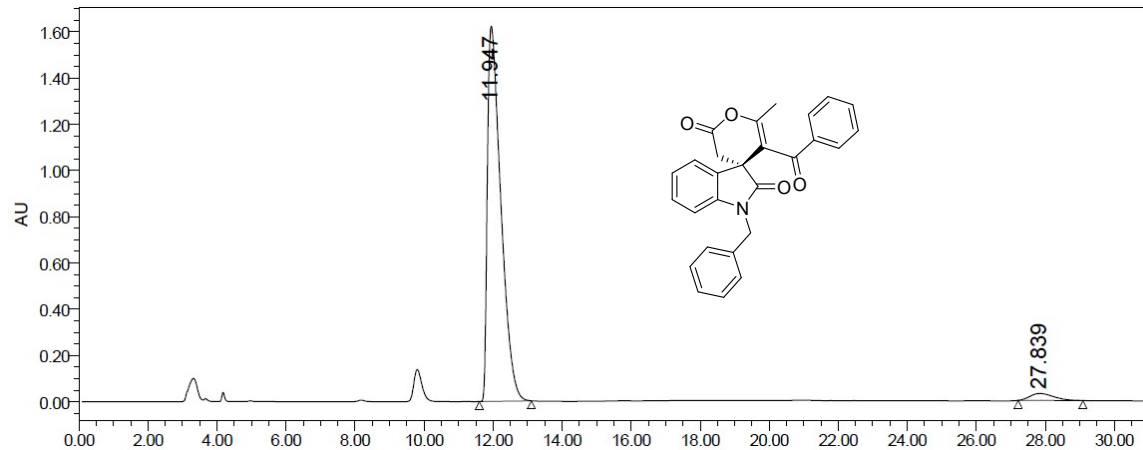

| Peak | Retention time (min) | Peak area (mAU*s) | Peak height (mAU) | Peak area (%) |
|------|----------------------|-------------------|-------------------|---------------|
| 1    | 11.947               | 43919780          | 1622670           | 96.84         |
| 2    | 27.839               | 1431456           | 30235             | 3.16          |

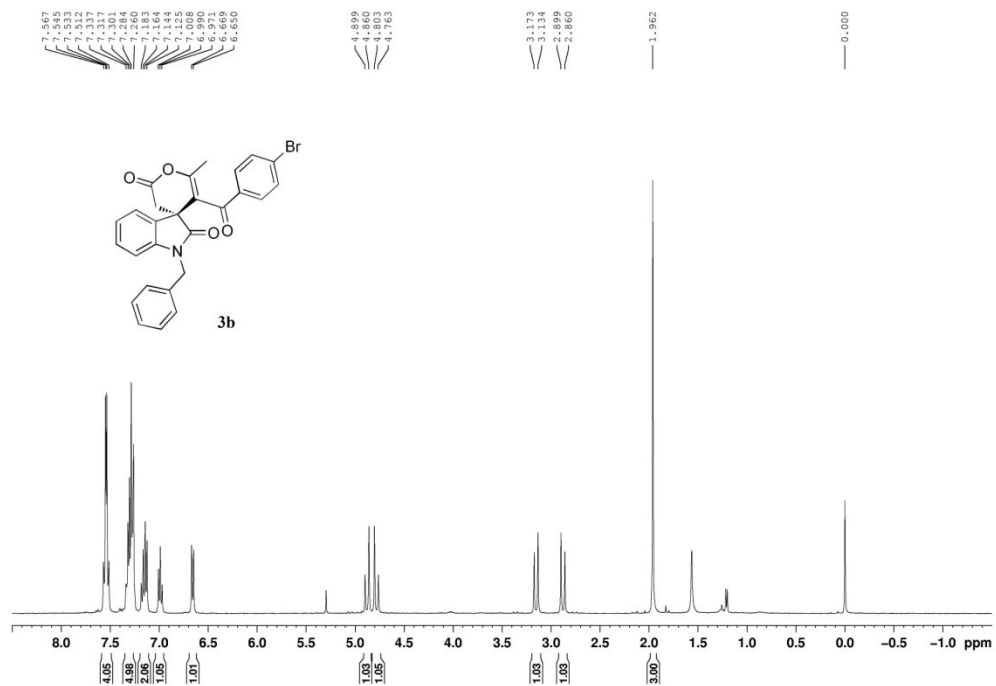

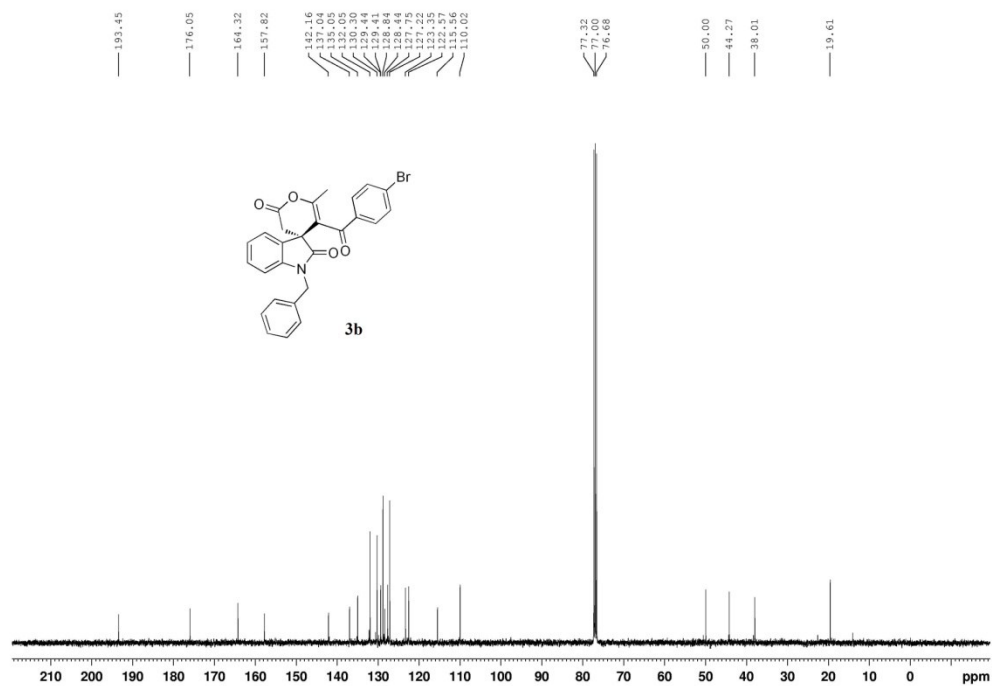

HPLC analysis of **3b** using chiral IC Column ( $\text{CH}_2\text{Cl}_2$ : *n*-hexane = 65:35, 1.0 mL/min)

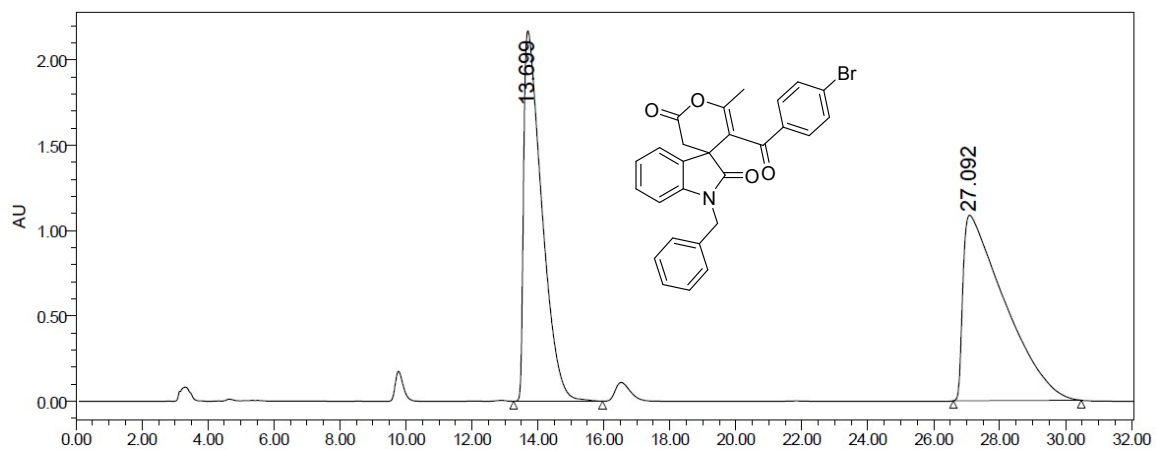

| Peak | Retention time (min) | Peak area (mAU*s) | Peak height (mAU) | Peak area (%) |
|------|----------------------|-------------------|-------------------|---------------|
| 1    | 13.699               | 82851942          | 2170508           | 46.40         |
| 2    | 27.092               | 95693021          | 1086846           | 53.60         |



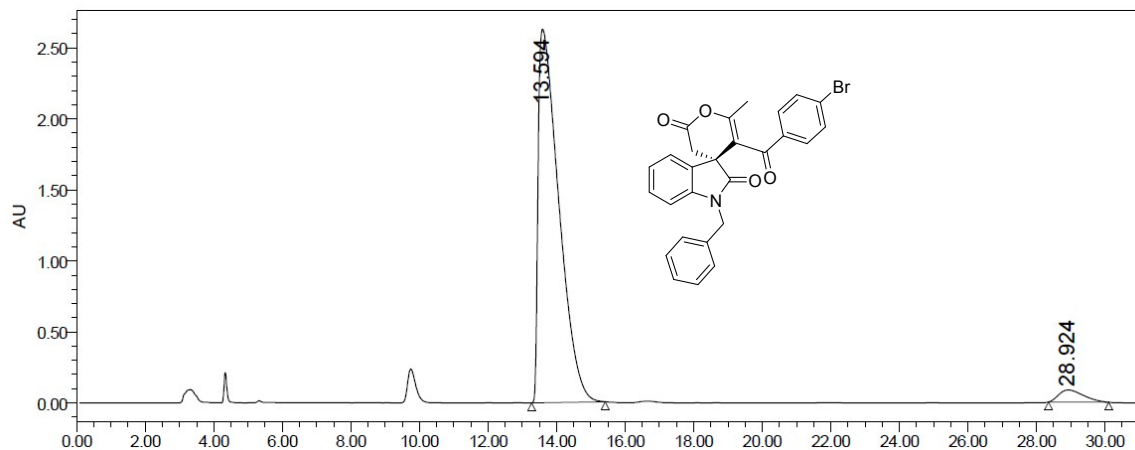

| Peak | Retention time (min) | Peak area (mAU*s) | Peak height (mAU) | Peak area (%) |
|------|----------------------|-------------------|-------------------|---------------|
| 1    | 13.594               | 109889625         | 2629747           | 96.28         |
| 2    | 28.924               | 4249272           | 85.169            | 3.72          |

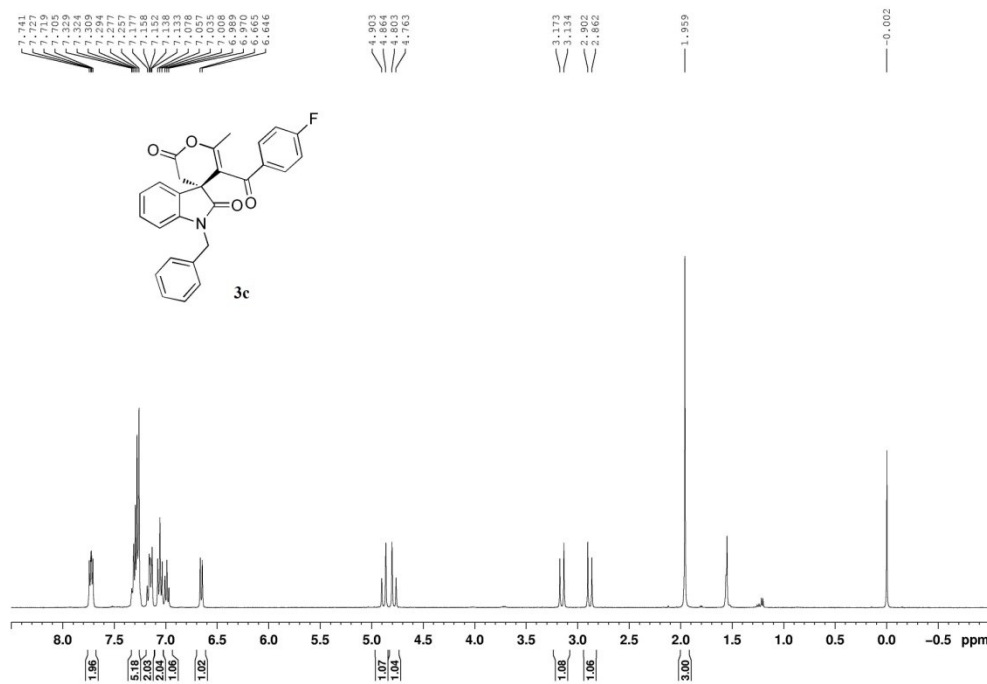

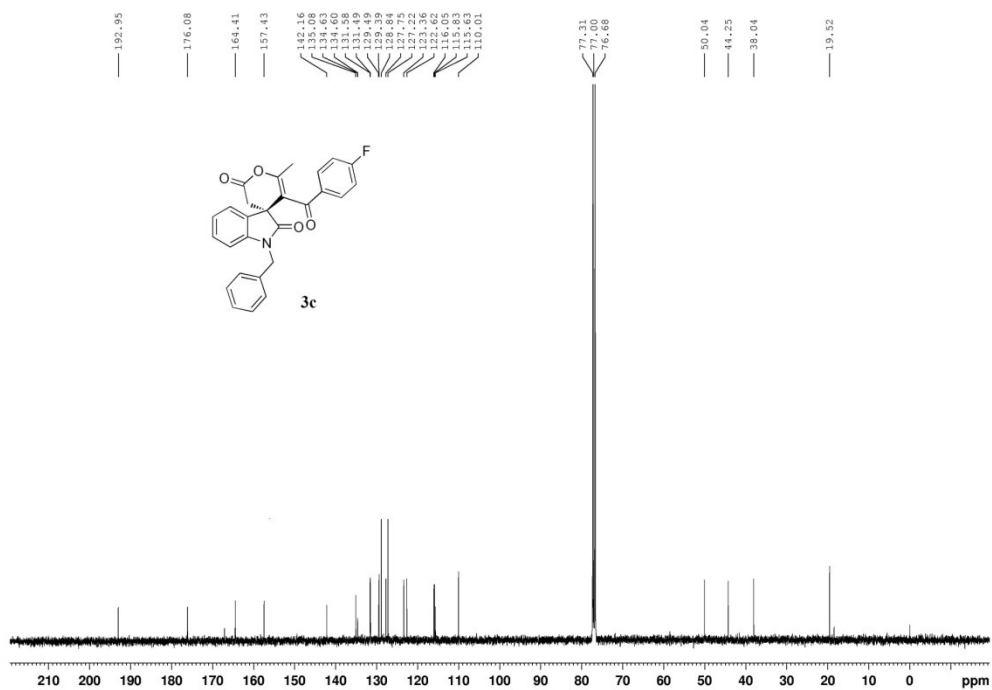

HPLC analysis of **3c** using chiral IC Column ( $\text{CH}_2\text{Cl}_2$ : *n*-hexane = 65:35, 1.0 mL/min)

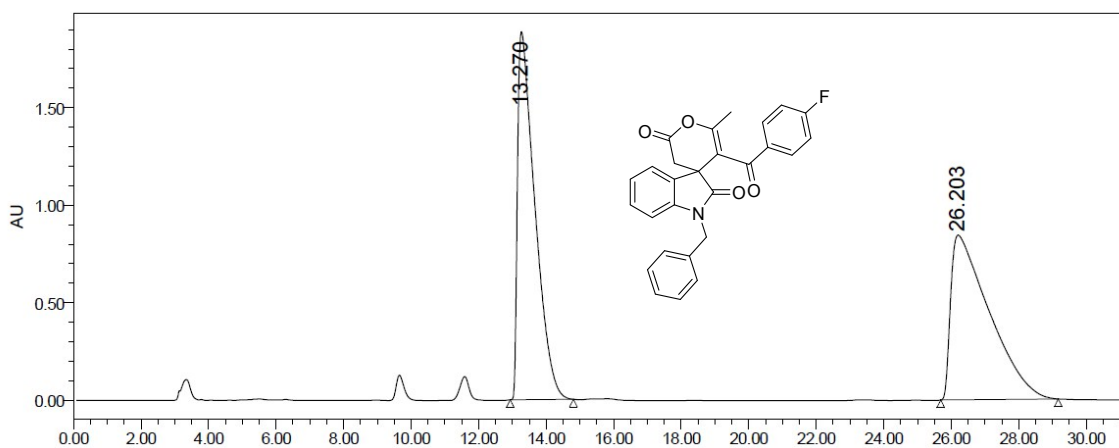

| Peak | Retention time (min) | Peak area (mAU*s) | Peak height (mAU) | Peak area (%) |
|------|----------------------|-------------------|-------------------|---------------|
| 1    | 13.270               | 67303113          | 1885941           | 50.12         |
| 2    | 26.203               | 66976137          | 844006            | 49.88         |

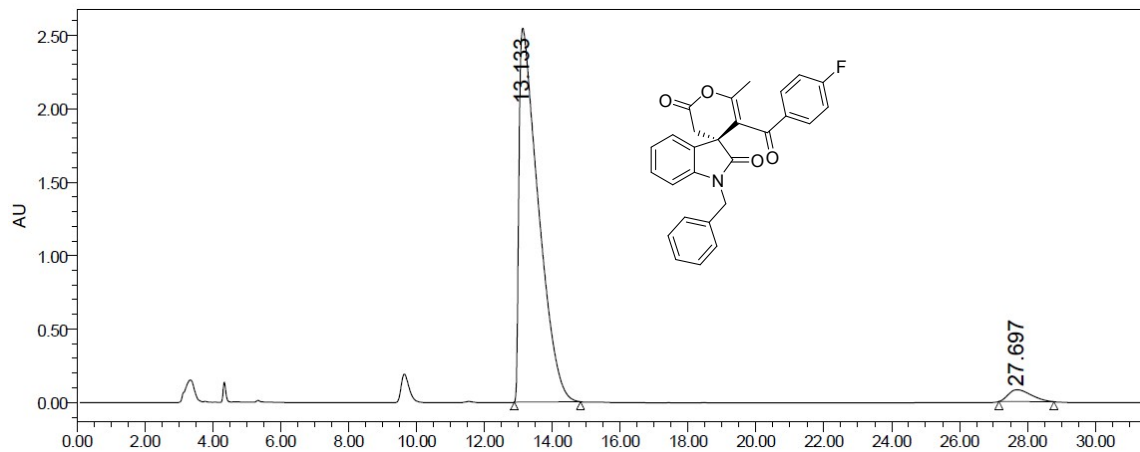

| Peak | Retention time (min) | Peak area (mAU*s) | Peak height (mAU) | Peak area (%) |
|------|----------------------|-------------------|-------------------|---------------|
| 1    | 13.133               | 100589268         | 2546817           | 96.39         |
| 2    | 27.697               | 3769388           | 81053             | 3.61          |

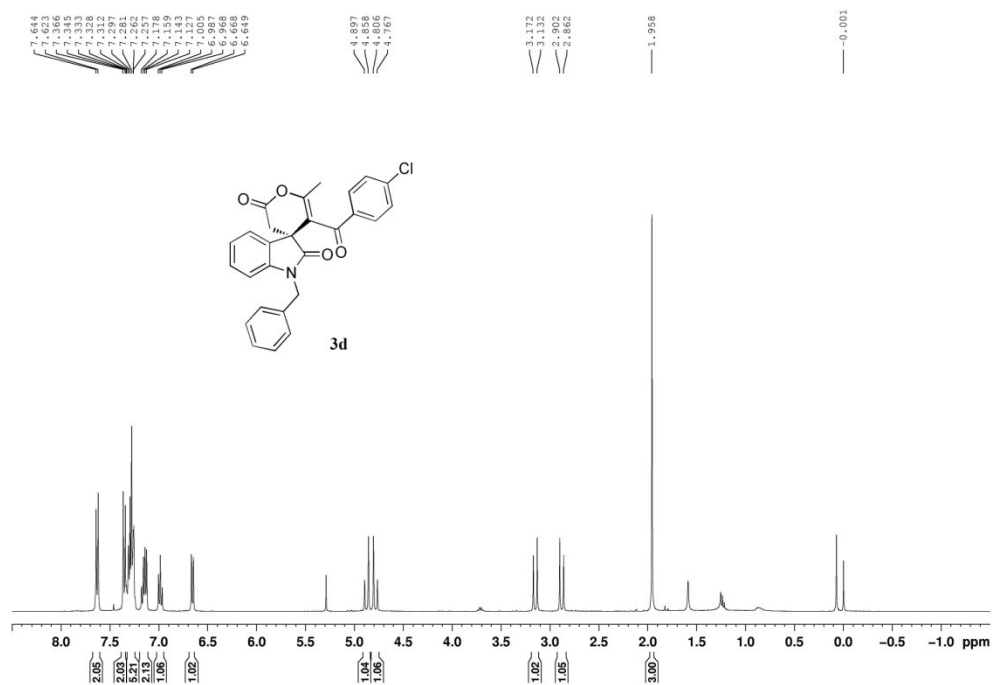

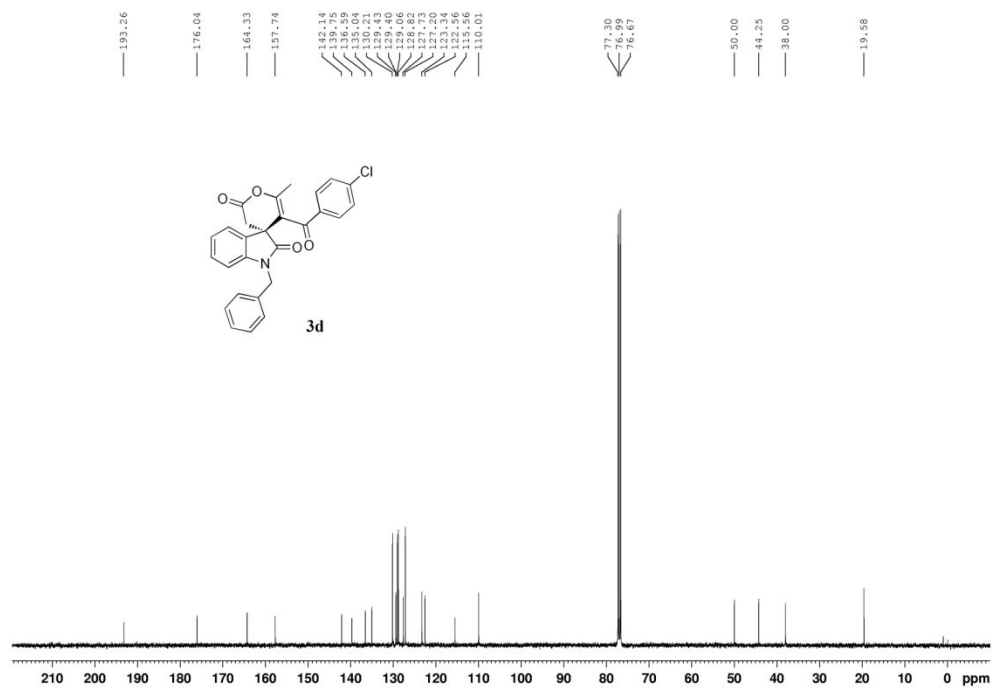

HPLC analysis of **3d** using chiral IC Column ( $\text{CH}_2\text{Cl}_2$ : *n*-hexane = 65:35, 1.0 mL/min)

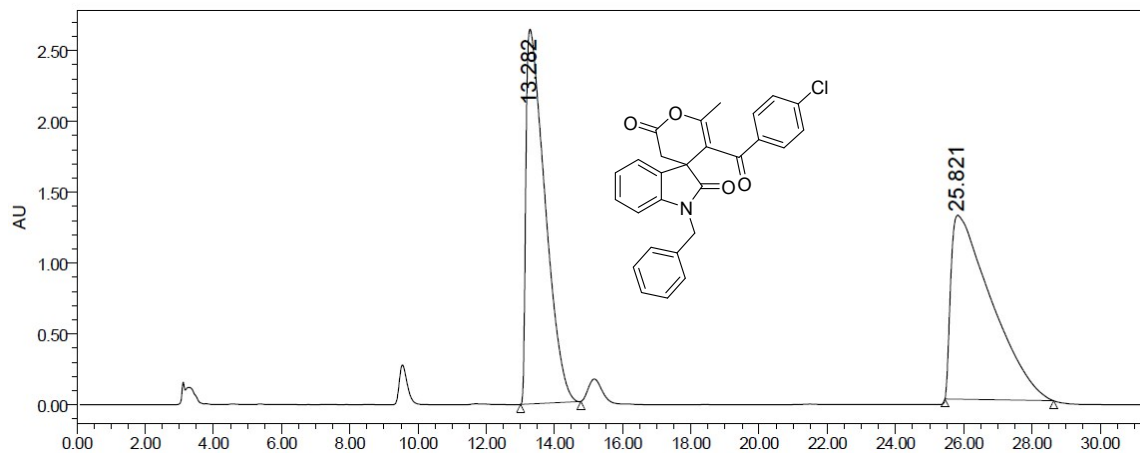

| Peak | Retention time (min) | Peak area (mAU*s) | Peak height (mAU) | Peak area (%) |
|------|----------------------|-------------------|-------------------|---------------|
| 1    | 13.282               | 102688555         | 2645408           | 48.79         |
| 2    | 25.821               | 107789206         | 1297725           | 51.21         |

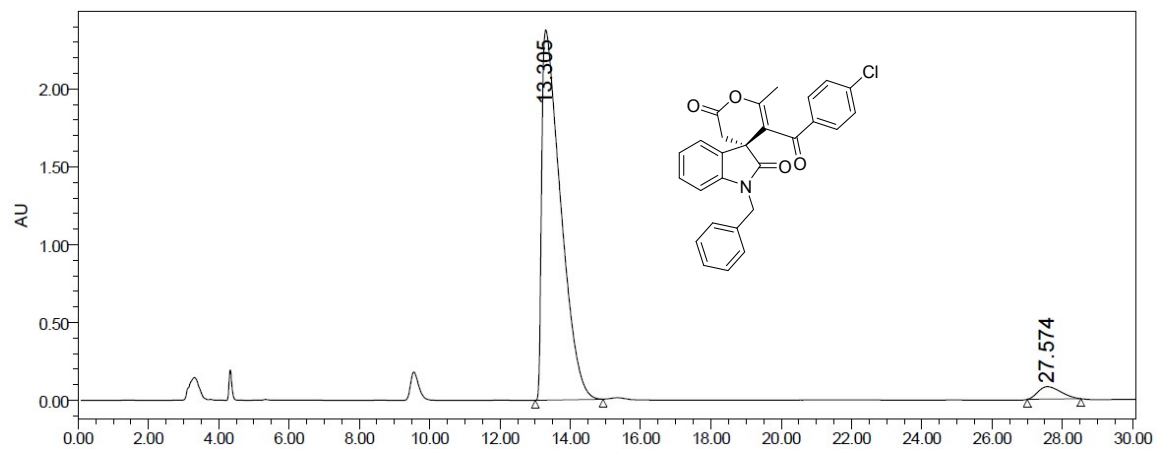

| Peak | Retention time (min) | Peak area (mAU*s) | Peak height (mAU) | Peak area (%) |
|------|----------------------|-------------------|-------------------|---------------|
| 1    | 13.305               | 88675355          | 2377858           | 96.12         |
| 2    | 27.574               | 3580874           | 79642             | 3.88          |

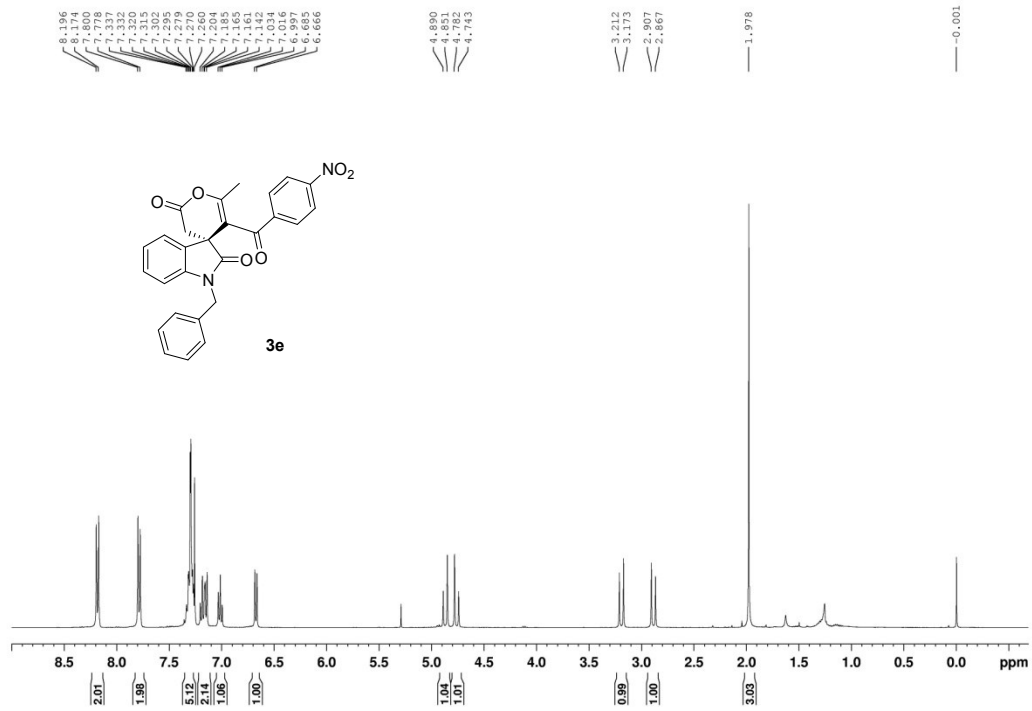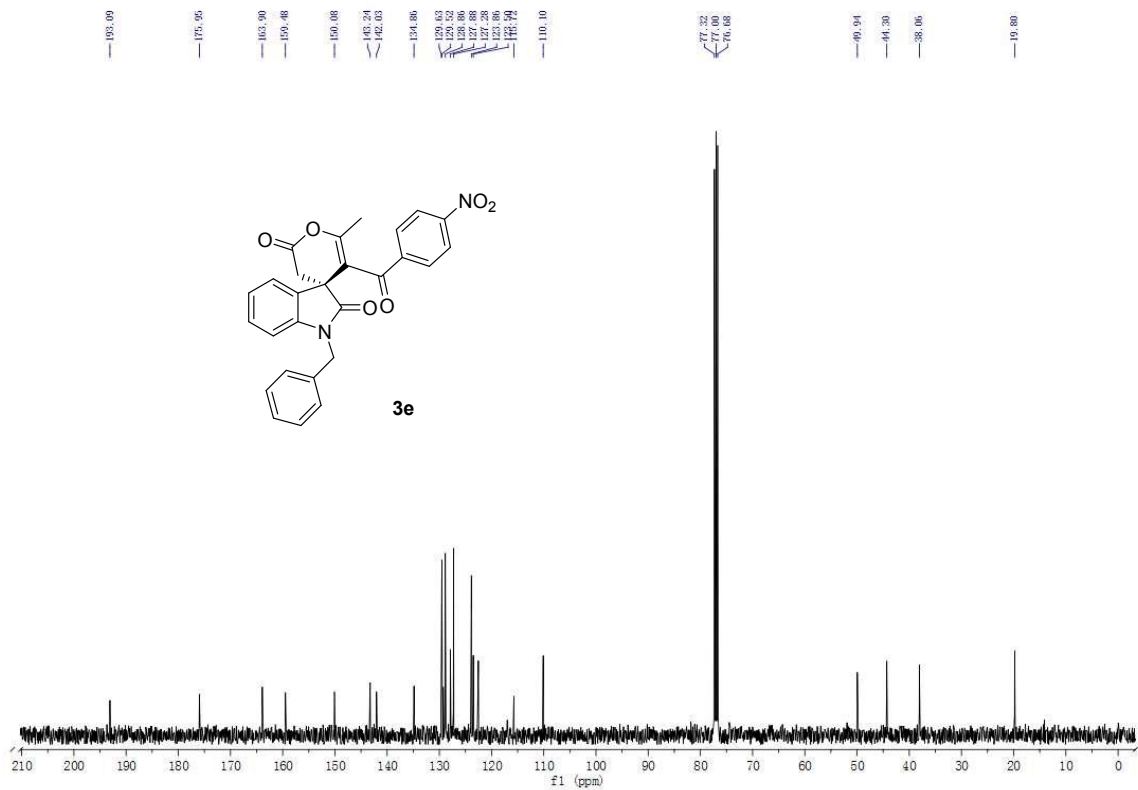

HPLC analysis of **3e** using chiral IC Column (CH<sub>2</sub>Cl<sub>2</sub>: *n*-hexane = 65:35, 1.0 mL/min)

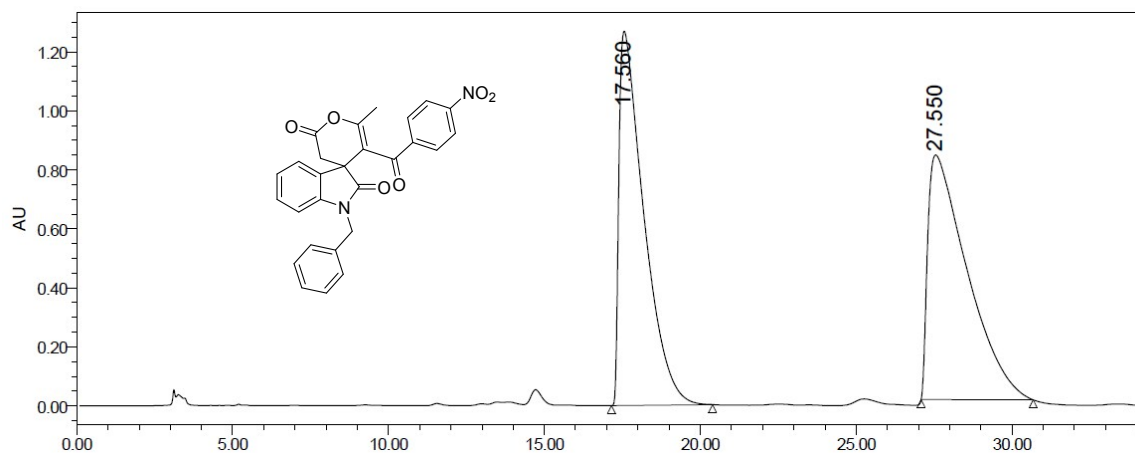

| Peak | Retention time (min) | Peak area (mAU*s) | Peak height (mAU) | Peak area (%) |
|------|----------------------|-------------------|-------------------|---------------|
| 1    | 17.560               | 70146338          | 1268200           | 49.05         |
| 2    | 27.550               | 72856798          | 828507            | 50.95         |

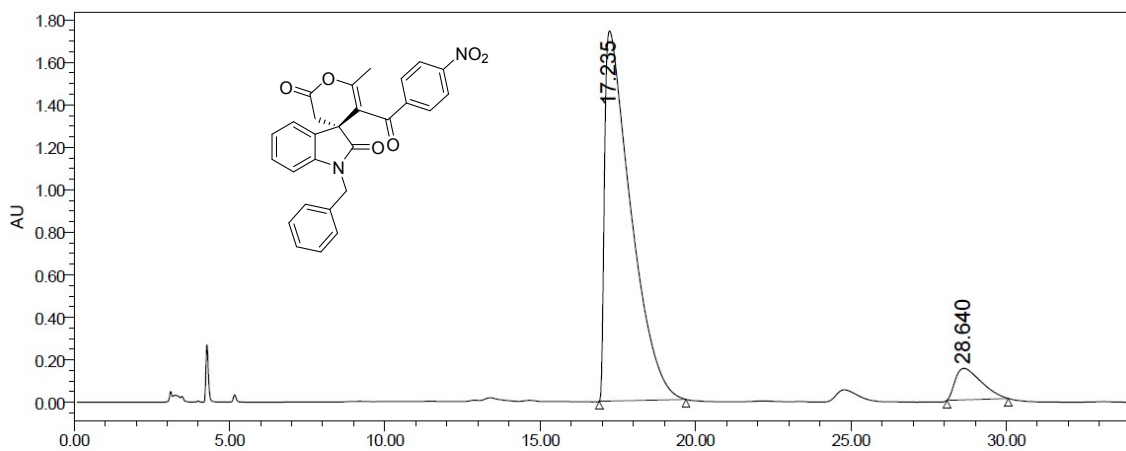

| Peak | Retention time (min) | Peak area (mAU*s) | Peak height (mAU) | Peak area (%) |
|------|----------------------|-------------------|-------------------|---------------|
| 1    | 17.235               | 101834725         | 1742672           | 92.22         |
| 2    | 28.640               | 8595320           | 147780            | 7.78          |

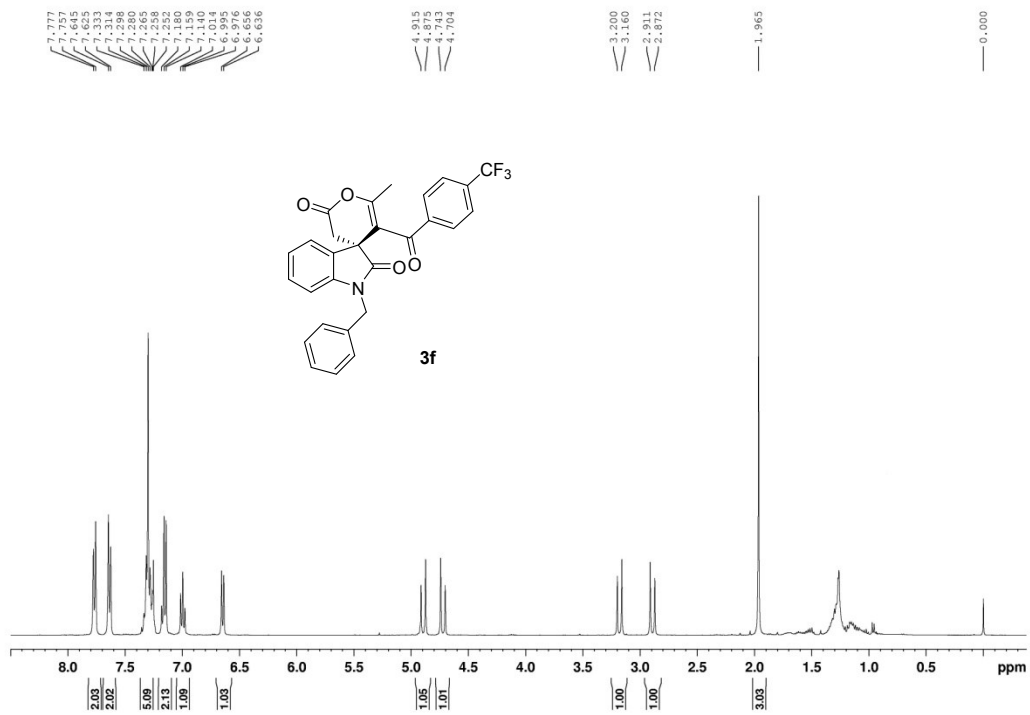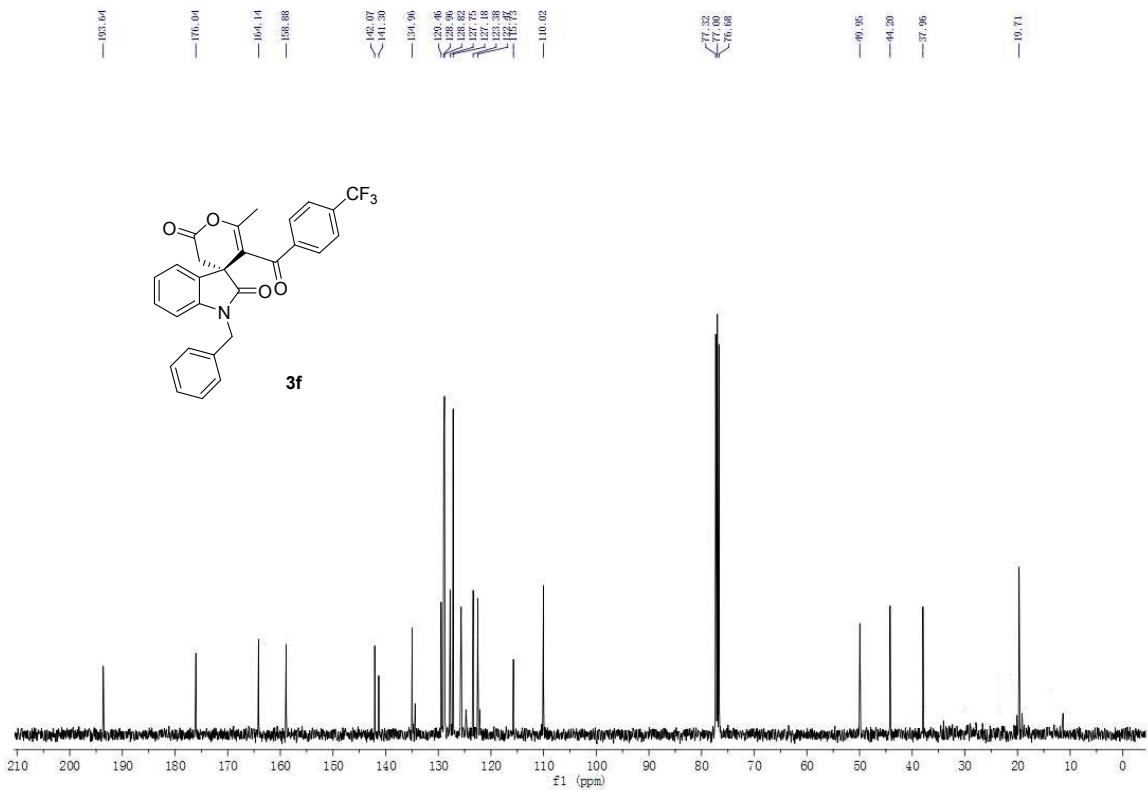



HPLC analysis of **3f** using chiral IC Column (CH<sub>2</sub>Cl<sub>2</sub>: *n*-hexane = 50:50, 1.0 mL/min)

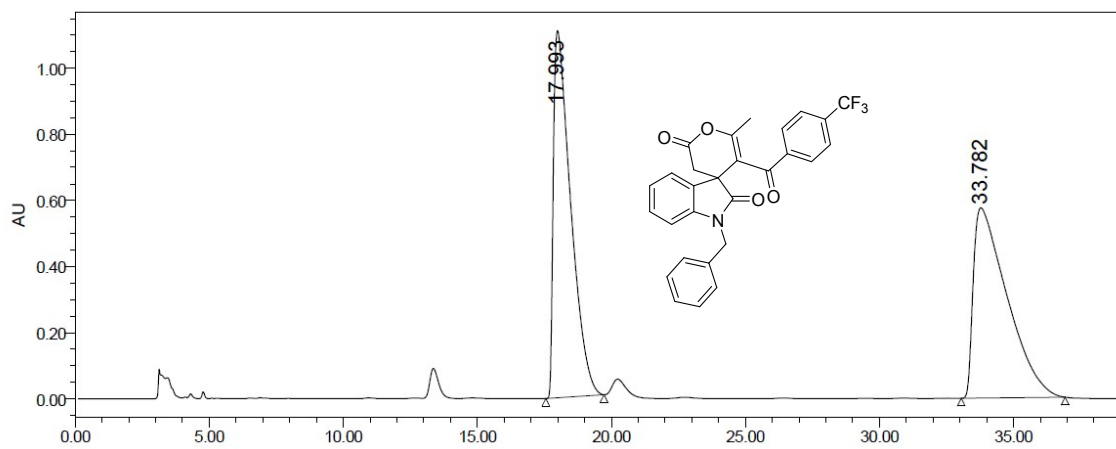

| Peak | Retention time (min) | Peak area (mAU*s) | Peak height (mAU) | Peak area (%) |
|------|----------------------|-------------------|-------------------|---------------|
| 1    | 17.993               | 49814355          | 1110137           | 49.75         |
| 2    | 33.782               | 50313409          | 575412            | 50.25         |

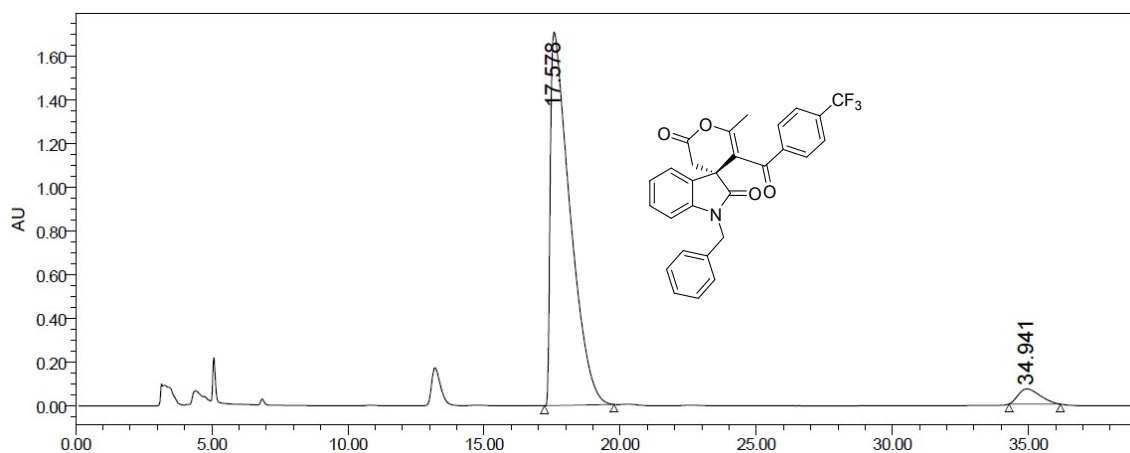

| Peak | Retention time (min) | Peak area (mAU*s) | Peak height (mAU) | Peak area (%) |
|------|----------------------|-------------------|-------------------|---------------|
| 1    | 17.578               | 85584496          | 1709406           | 95.70         |
| 2    | 34.941               | 3846181           | 69093             | 4.30          |

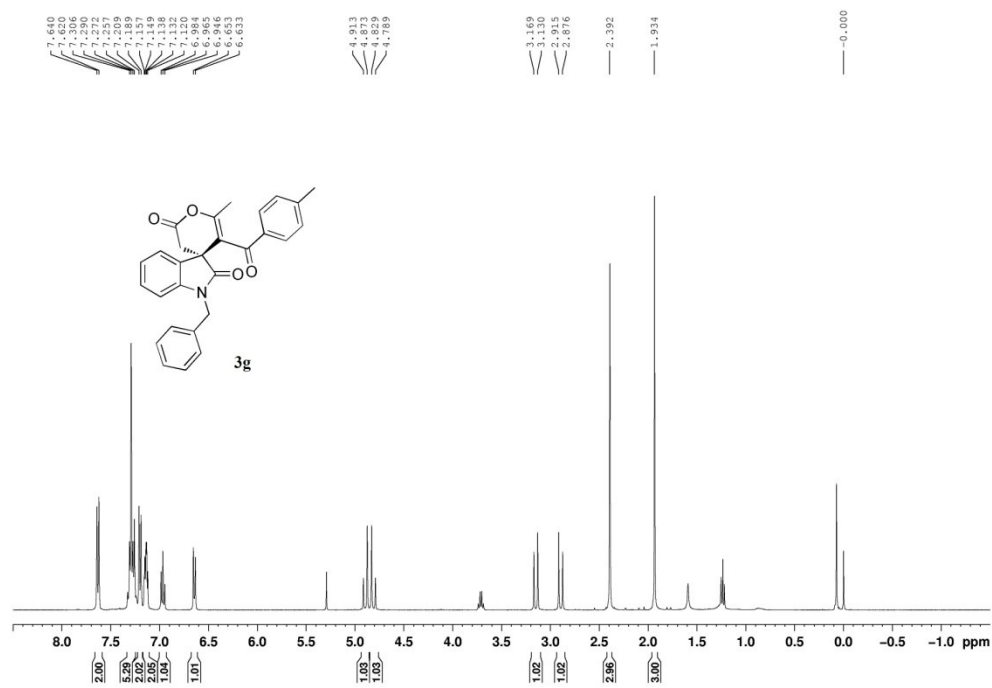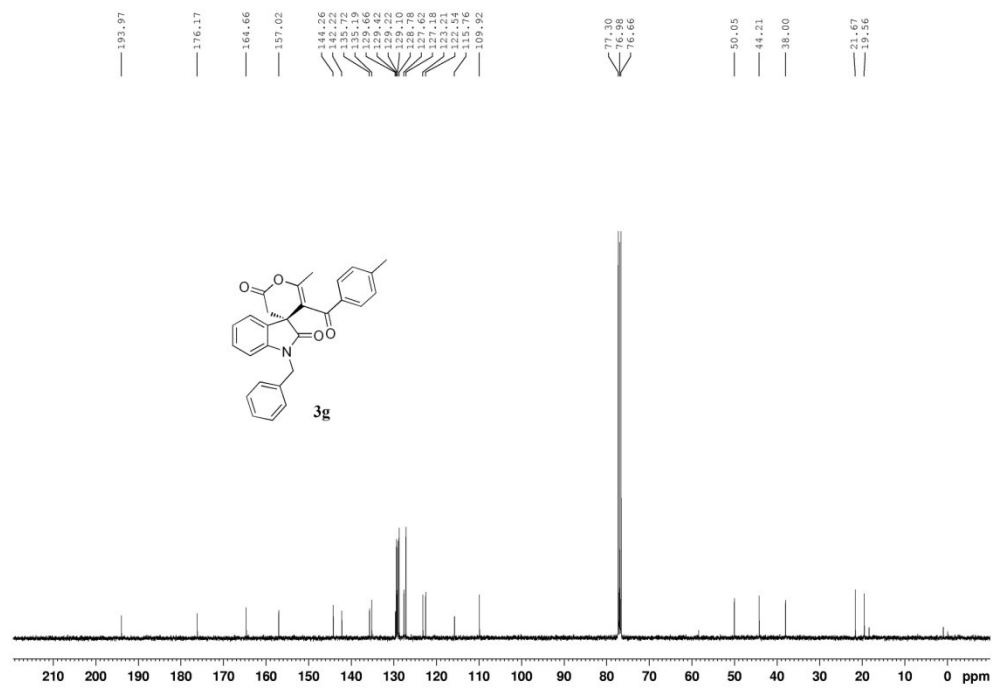

HPLC analysis of **3g** using chiral IC Column (CH<sub>2</sub>Cl<sub>2</sub>: *n*-hexane = 65:35, 1.0 mL/min)

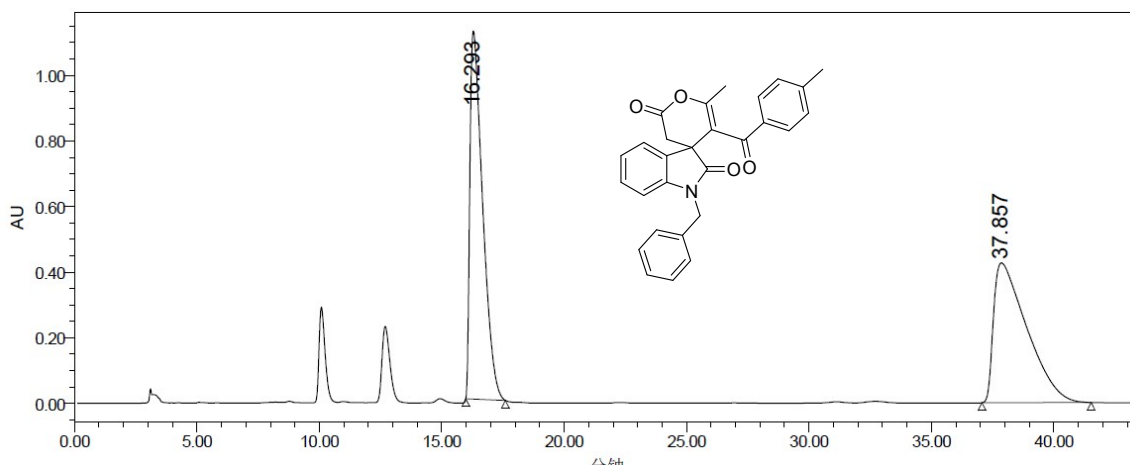

| Peak | Retention time (min) | Peak area (mAU*s) | Peak height (mAU) | Peak area (%) |
|------|----------------------|-------------------|-------------------|---------------|
| 1    | 16.293               | 40651194          | 1122180           | 50.26         |
| 2    | 37.857               | 40237228          | 425988            | 49.74         |

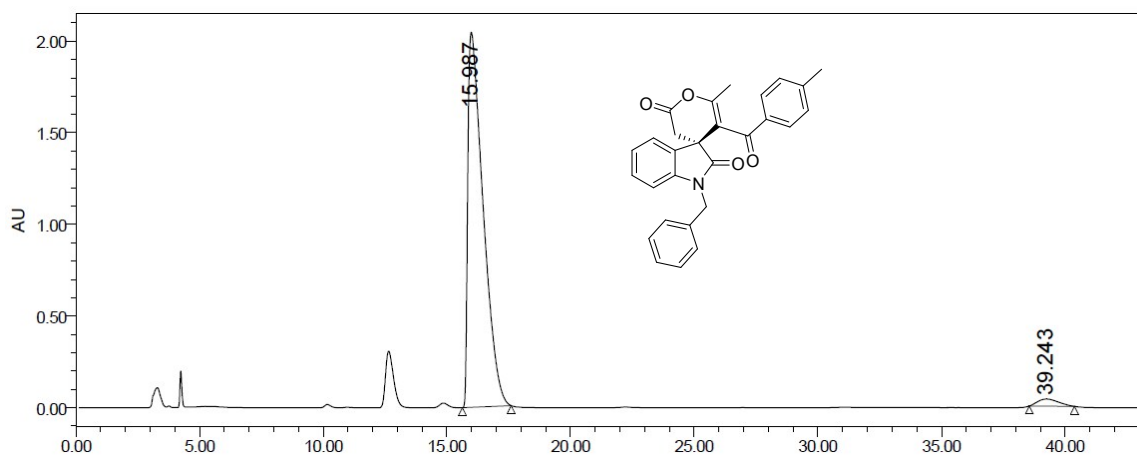

| Peak | Retention time (min) | Peak area (mAU*s) | Peak height (mAU) | Peak area (%) |
|------|----------------------|-------------------|-------------------|---------------|
| 1    | 15.987               | 879.03777         | 2046651           | 97.48         |
| 2    | 39.243               | 2275791           | 38691             | 2.52          |

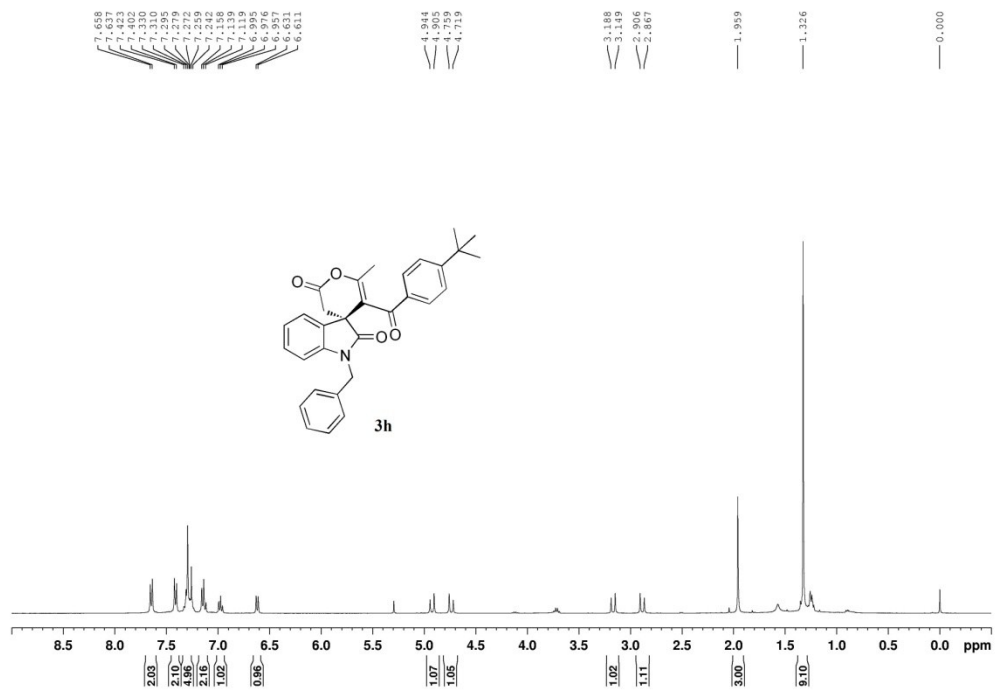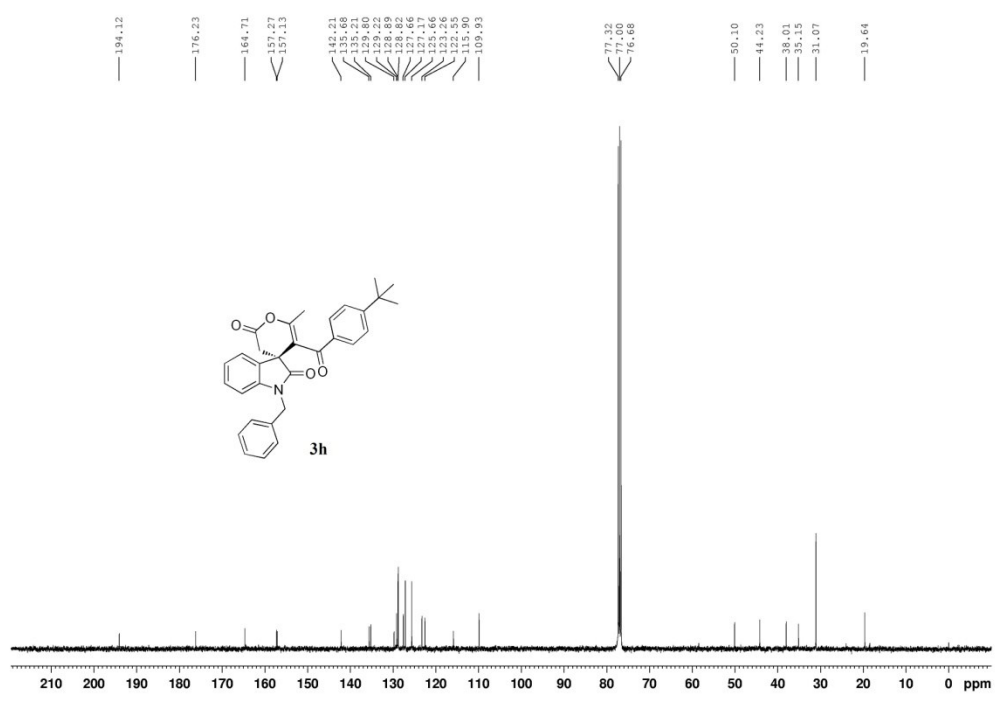

HPLC analysis of **3h** using chiral IC Column (CH<sub>2</sub>Cl<sub>2</sub>: *n*-hexane = 65:35, 1.0 mL/min)

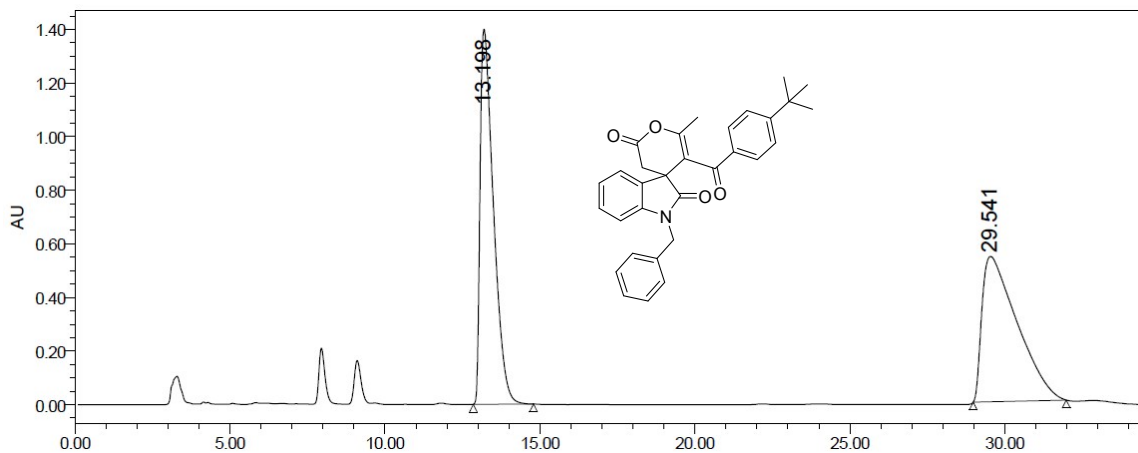

| Peak | Retention time (min) | Peak area (mAU*s) | Peak height (mAU) | Peak area (%) |
|------|----------------------|-------------------|-------------------|---------------|
| 1    | 13.198               | 41814370          | 1398545           | 49.50         |
| 2    | 29.541               | 42663595          | 542188            | 50.50         |

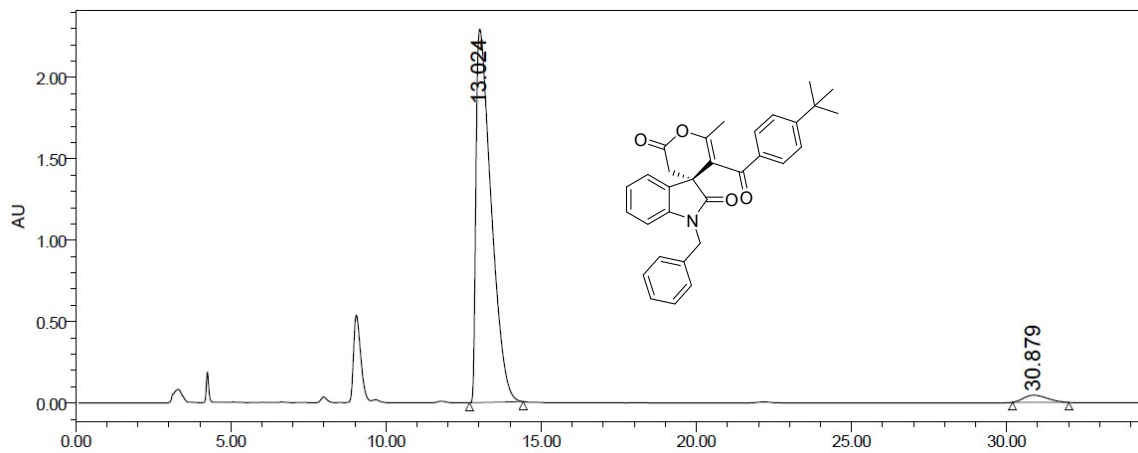

| Peak | Retention time (min) | Peak area (mAU*s) | Peak height (mAU) | Peak area (%) |
|------|----------------------|-------------------|-------------------|---------------|
| 1    | 13.024               | 77741525          | 2294357           | 97.14         |
| 2    | 30.879               | 2290120           | 43476             | 2.86          |

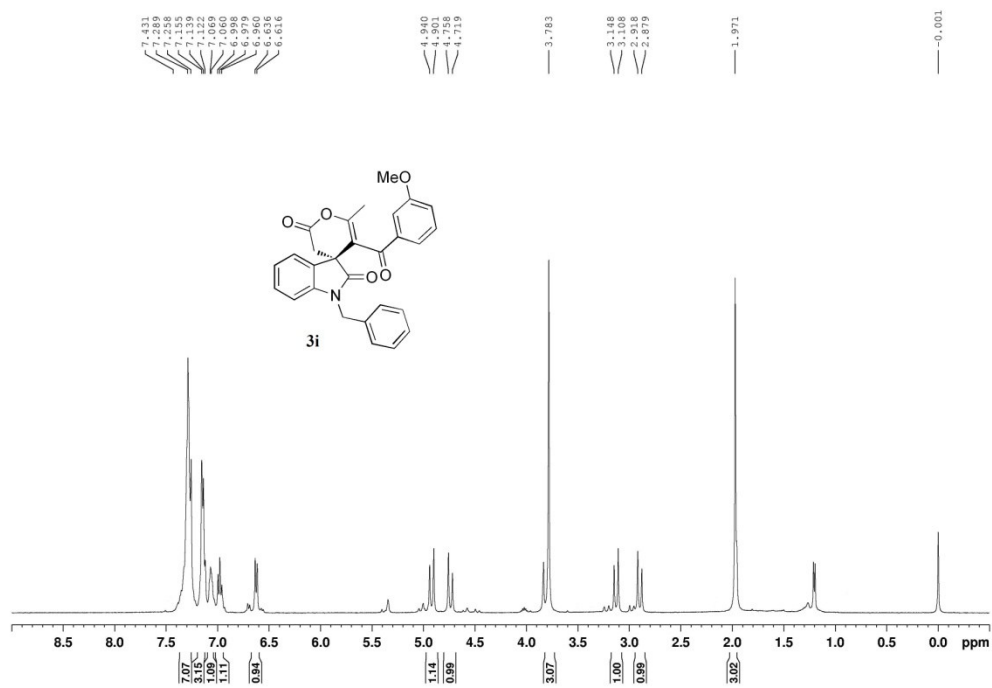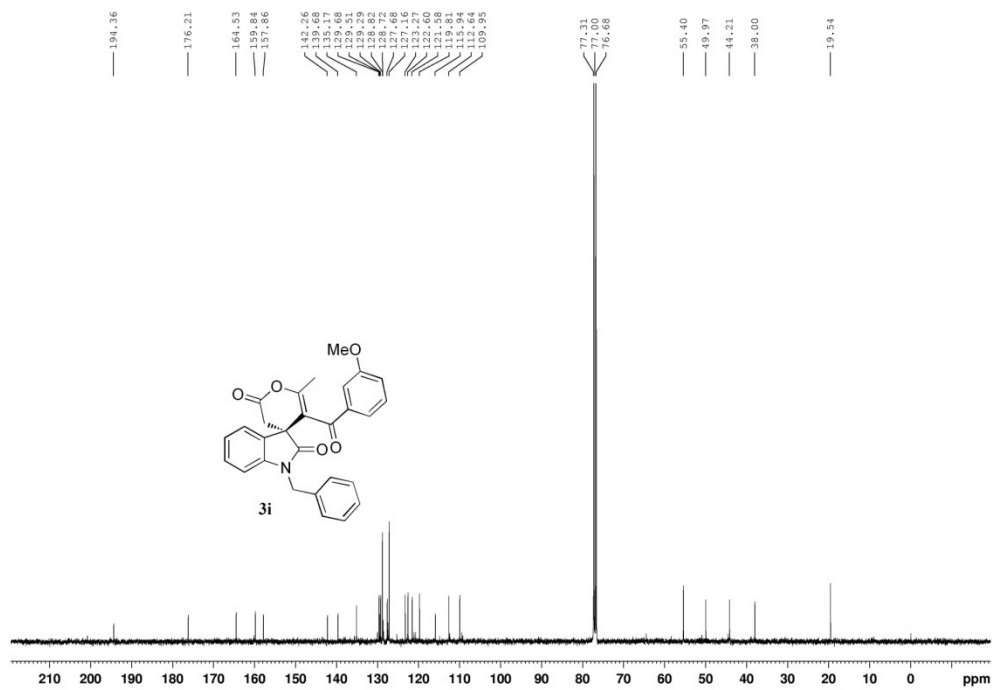

HPLC analysis of **3i** using chiral IC Column (CH<sub>2</sub>Cl<sub>2</sub>: *n*-hexane = 65:35, 1.0 mL/min)

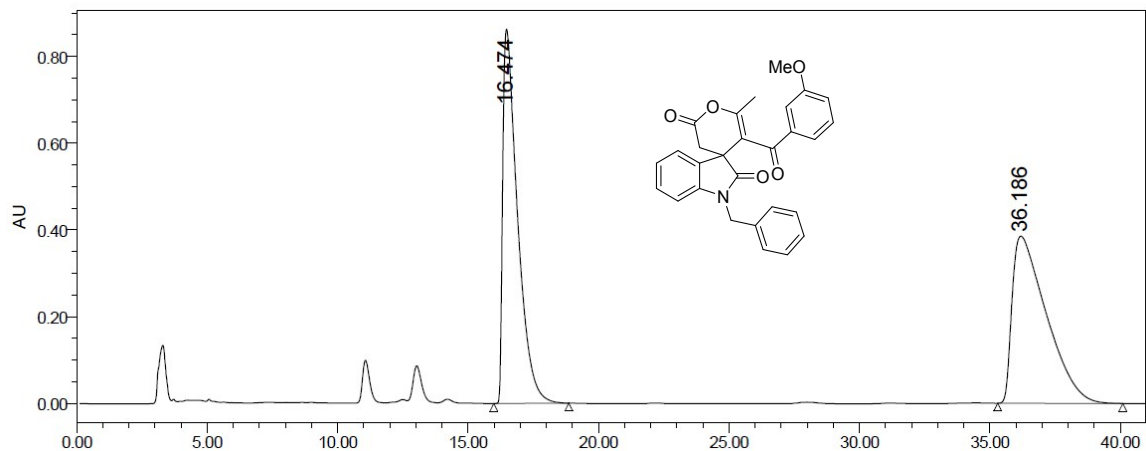

| Peak | Retention time (min) | Peak area (mAU*s) | Peak height (mAU) | Peak area (%) |
|------|----------------------|-------------------|-------------------|---------------|
| 1    | 16.474               | 33931349          | 862241            | 49.16         |
| 2    | 36.186               | 35086088          | 385051            | 50.84         |

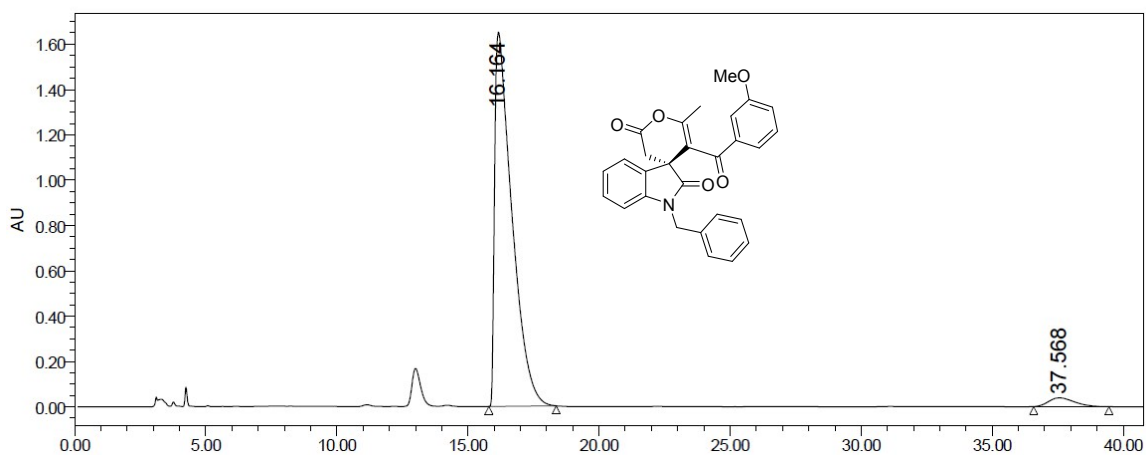

| Peak | Retention time (min) | Peak area (mAU*s) | Peak height (mAU) | Peak area (%) |
|------|----------------------|-------------------|-------------------|---------------|
| 1    | 16.164               | 75517645          | 1650711           | 96.65         |
| 2    | 37.568               | 2617482           | 38581             | 3.35          |

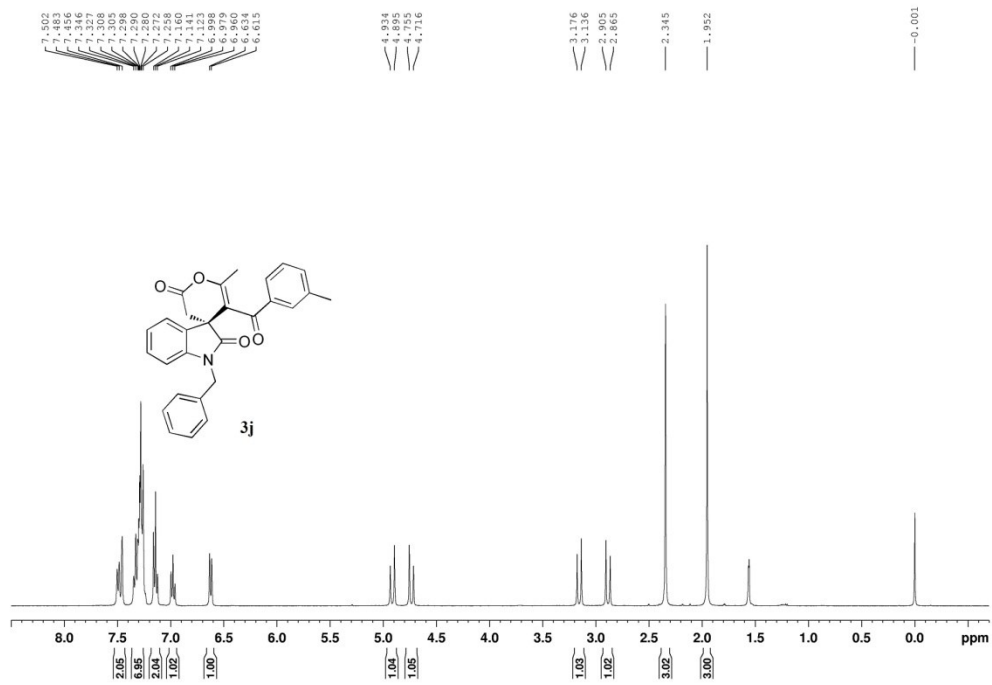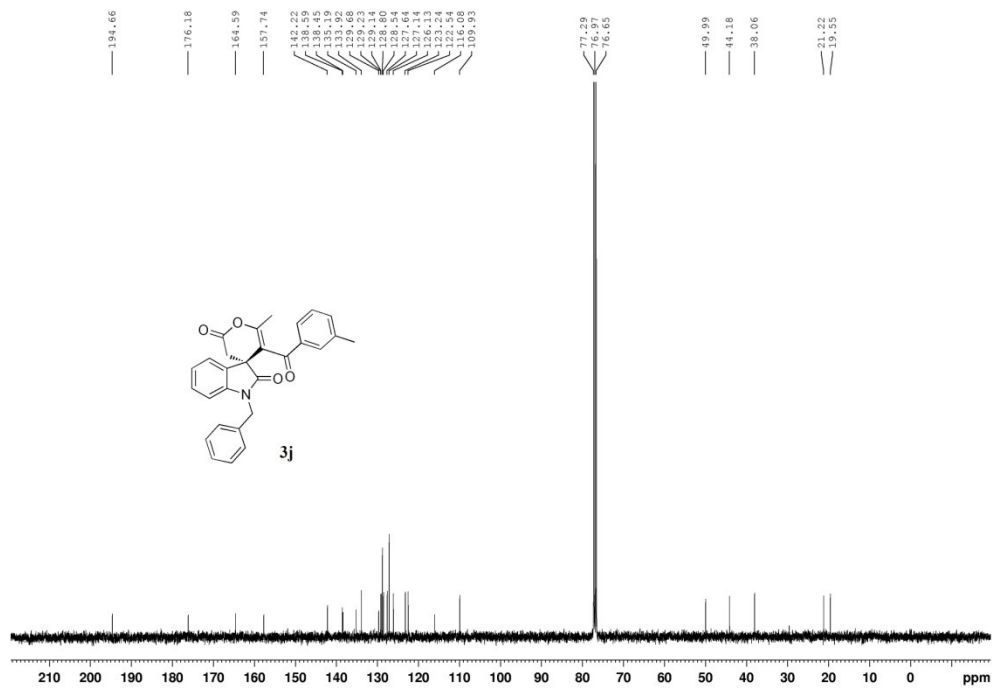



HPLC analysis of **3j** using chiral IC Column (CH<sub>2</sub>Cl<sub>2</sub>: *n*-hexane = 65:35, 1.0 mL/min)

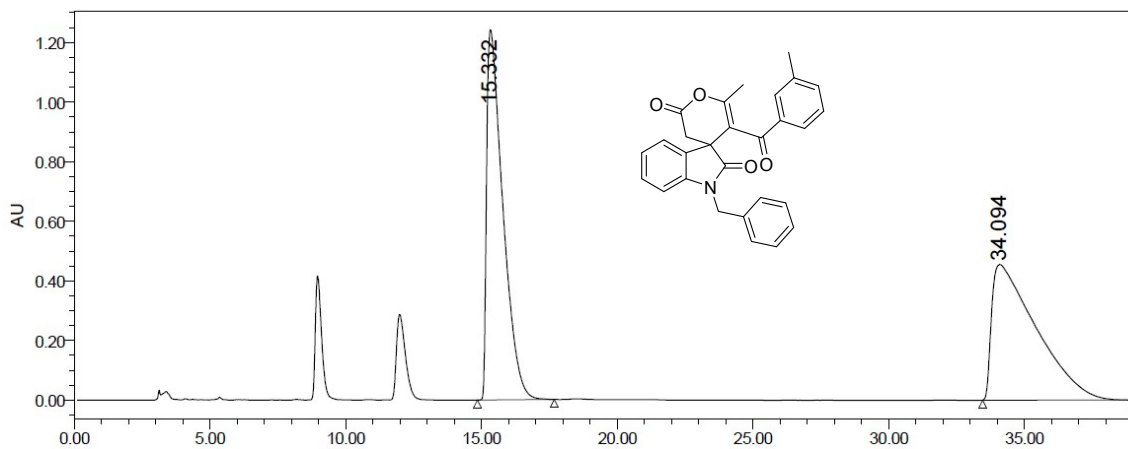

| Peak | Retention time (min) | Peak area (mAU*s) | Peak height (mAU) | Peak area (%) |
|------|----------------------|-------------------|-------------------|---------------|
| 1    | 15.332               | 51573759          | 1241674           | 49.90         |
| 2    | 34.094               | 51774328          | 454486            | 50.10         |

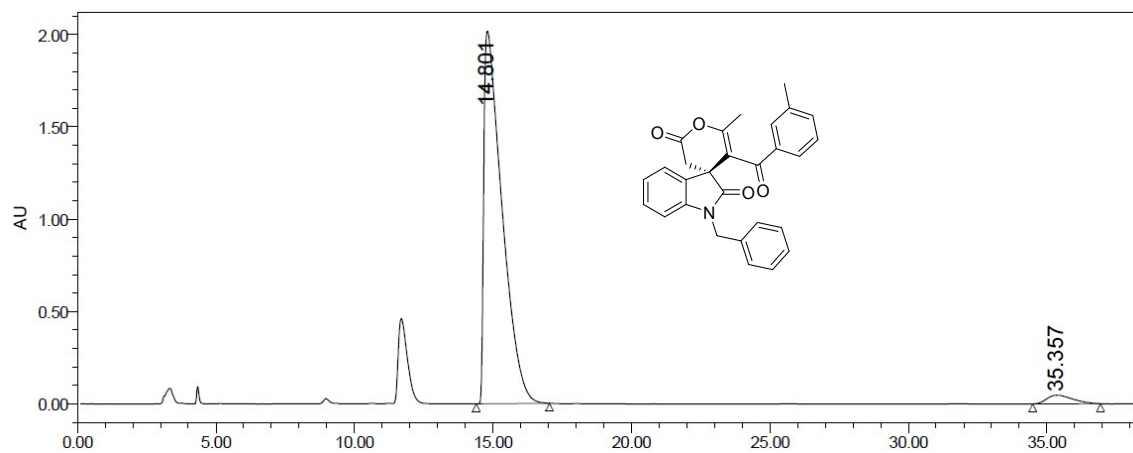

| Peak | Retention time (min) | Peak area (mAU*s) | Peak height (mAU) | Peak area (%) |
|------|----------------------|-------------------|-------------------|---------------|
| 1    | 14.801               | 92296298          | 2018600           | 96.84         |
| 2    | 35.357               | 3013713           | 46469             | 3.16          |

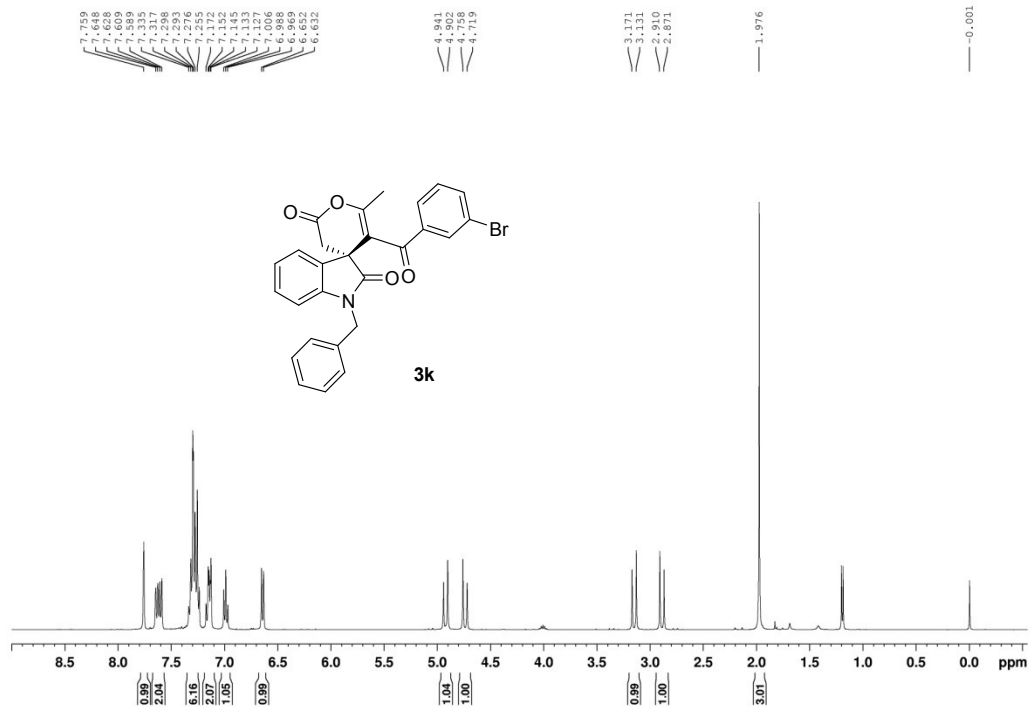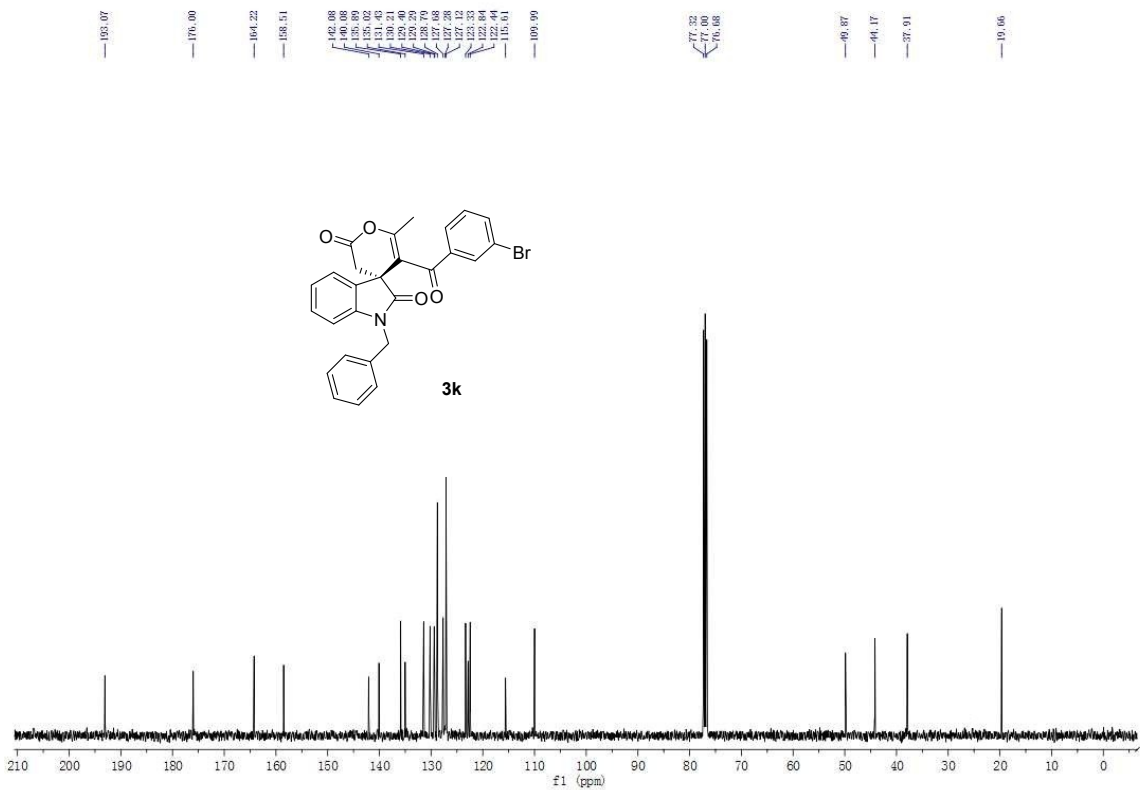

HPLC analysis of **3k** using chiral IC Column (CH<sub>2</sub>Cl<sub>2</sub>: *n*-hexane = 65:35, 1.0 mL/min)

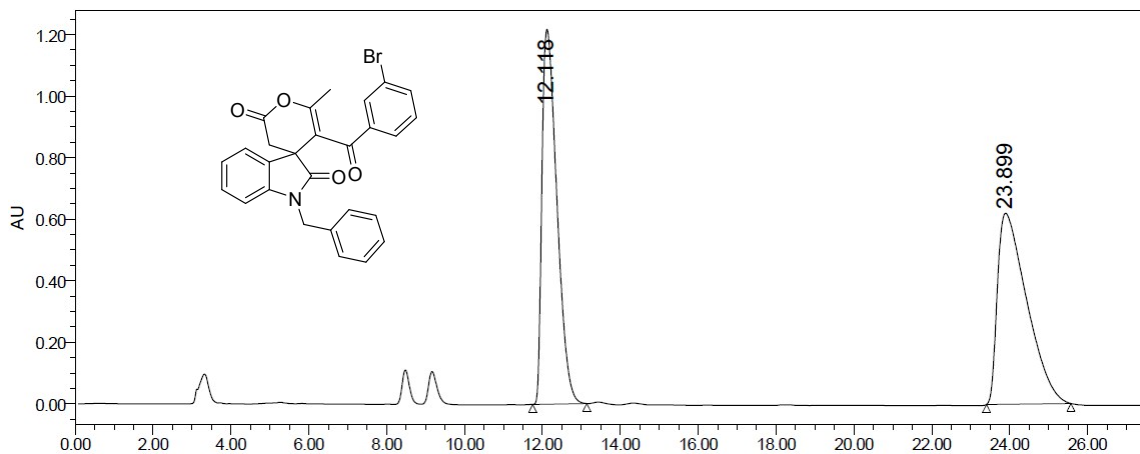

| Peak | Retention time (min) | Peak area (mAU*s) | Peak height (mAU) | Peak area (%) |
|------|----------------------|-------------------|-------------------|---------------|
| 1    | 12.118               | 3.243e7           | 1.218e6           | 49.99         |
| 2    | 23.899               | 3.245e7           | 6.201e5           | 50.01         |

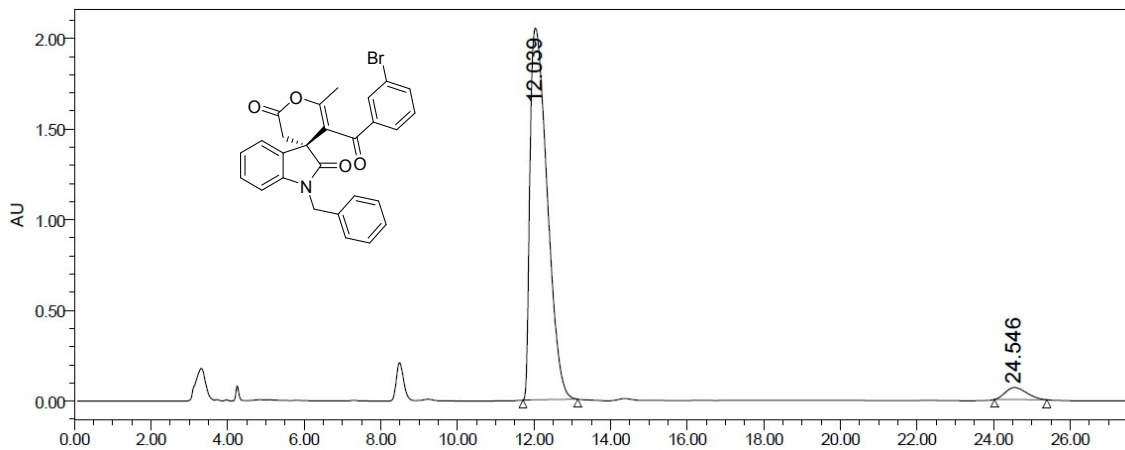

| Peak | Retention time (min) | Peak area (mAU*s) | Peak height (mAU) | Peak area (%) |
|------|----------------------|-------------------|-------------------|---------------|
| 1    | 12.039               | 6.373e7           | 2.050e6           | 96.12         |
| 2    | 24.546               | 2.575e6           | 6.604e4           | 3.88          |

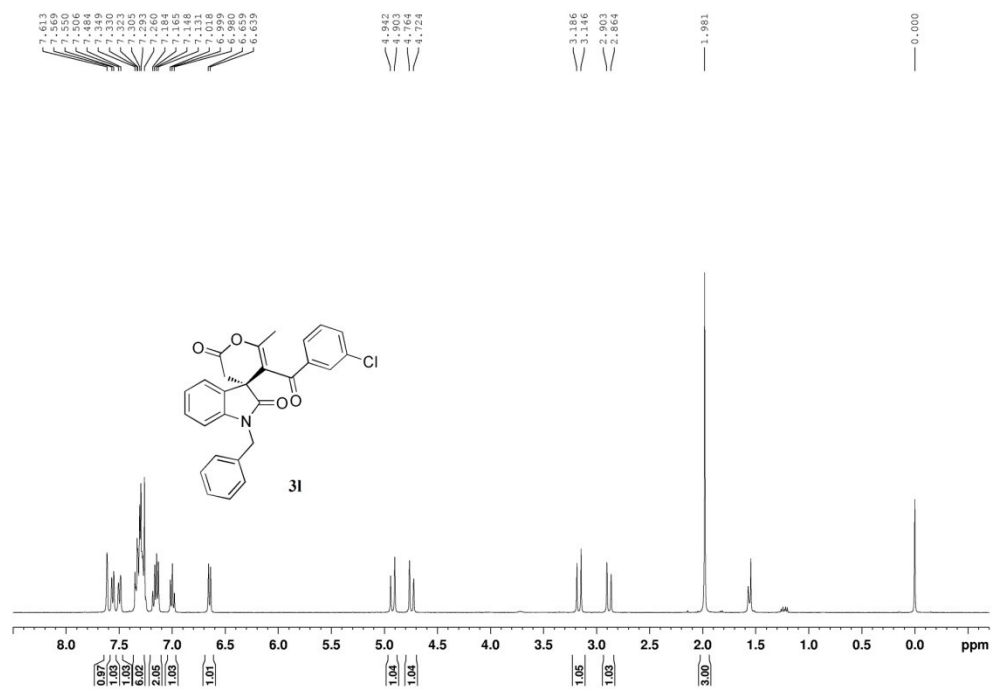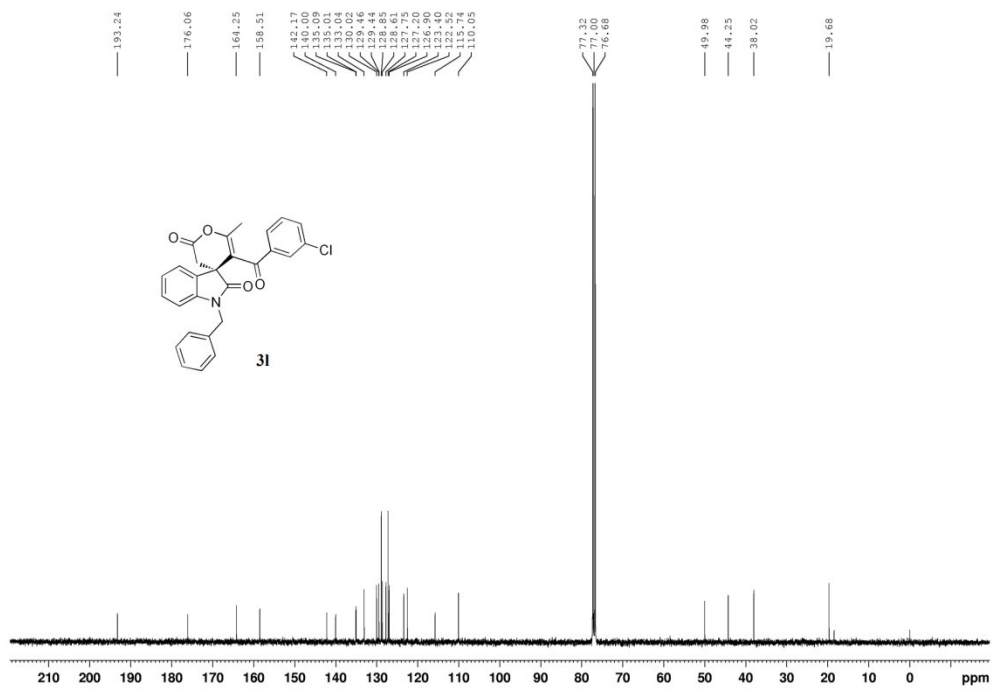

HPLC analysis of **31** using chiral IC Column (CH<sub>2</sub>Cl<sub>2</sub>: *n*-hexane = 65:35, 1.0 mL/min)

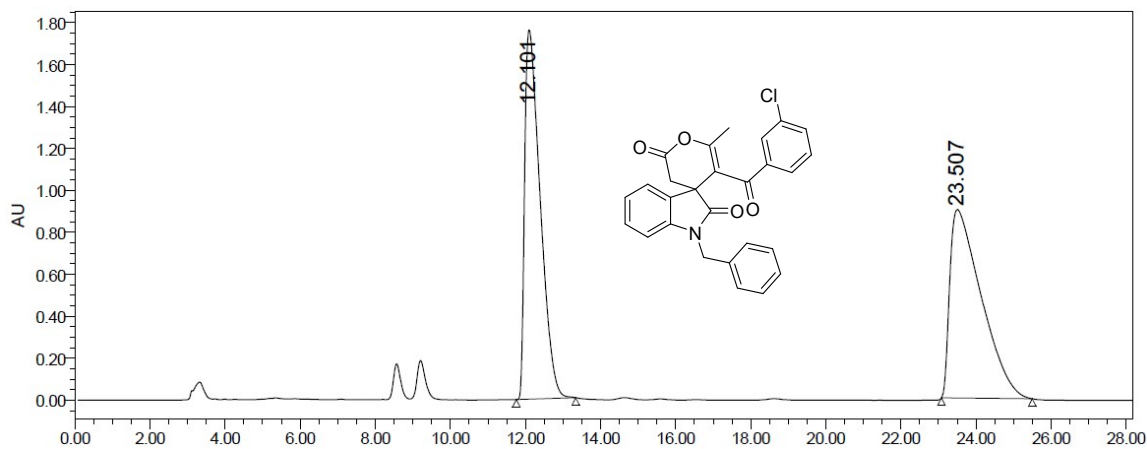

| Peak | Retention time (min) | Peak area (mAU*s) | Peak height (mAU) | Peak area (%) |
|------|----------------------|-------------------|-------------------|---------------|
| 1    | 12.101               | 50666678          | 1759850           | 49.90         |
| 2    | 23.507               | 52263185          | 897960            | 50.78         |

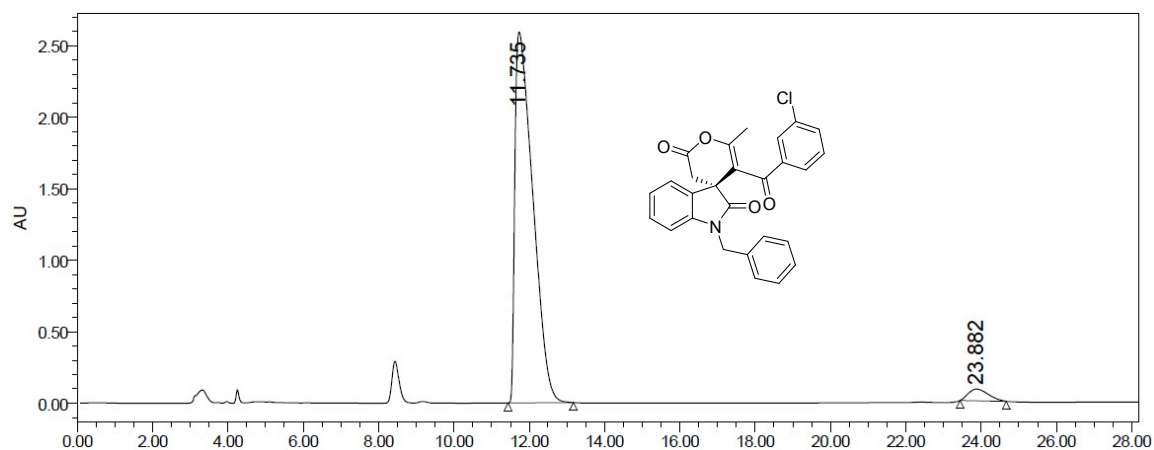

| Peak | Retention time (min) | Peak area (mAU*s) | Peak height (mAU) | Peak area (%) |
|------|----------------------|-------------------|-------------------|---------------|
| 1    | 11.735               | 85833961          | 2595404           | 96.61         |
| 2    | 23.882               | 3007733           | 81918             | 3.39          |

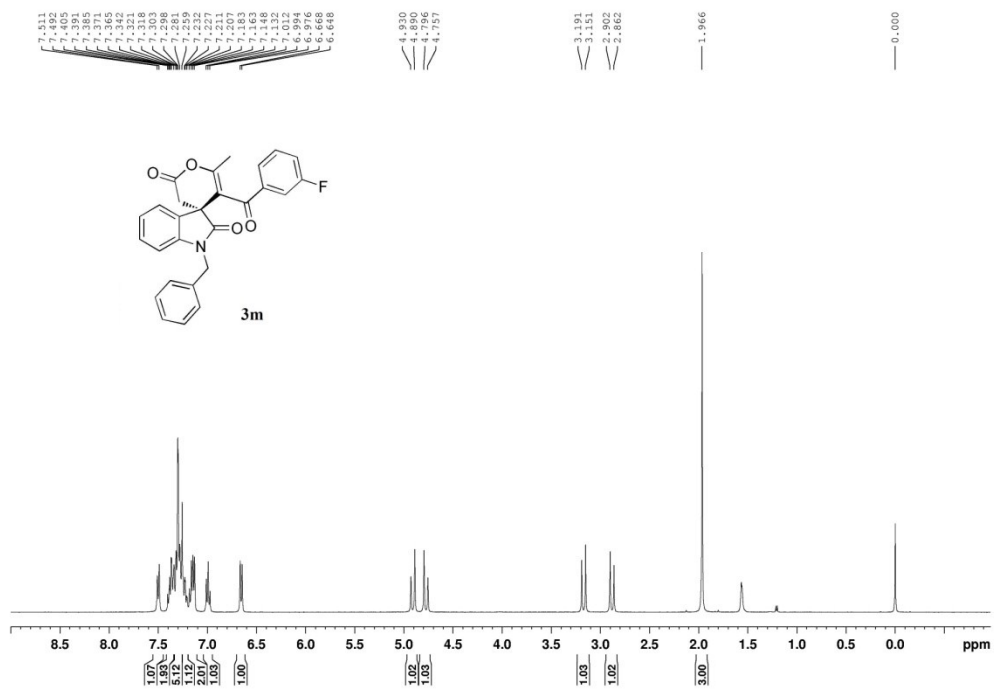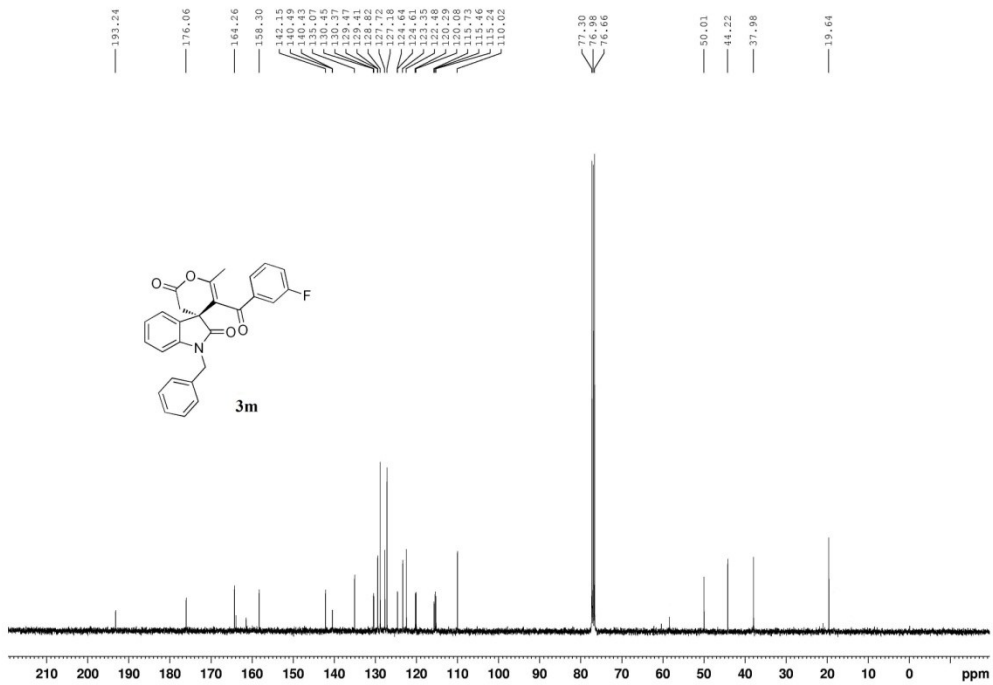

HPLC analysis of **3m** using chiral IC Column (CH<sub>2</sub>Cl<sub>2</sub>: *n*-hexane = 65:35, 1.0 mL/min)

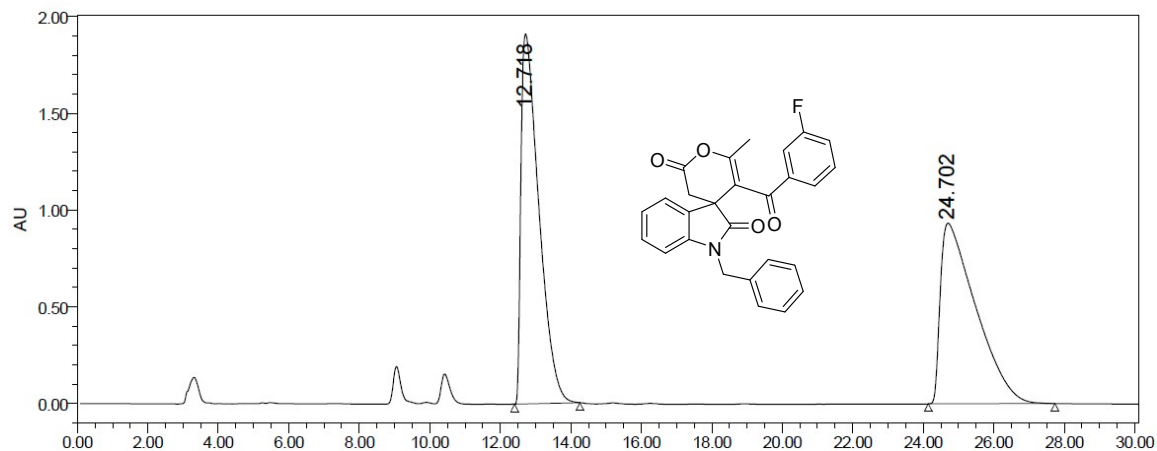

| Peak | Retention time (min) | Peak area (mAU*s) | Peak height (mAU) | Peak area (%) |
|------|----------------------|-------------------|-------------------|---------------|
| 1    | 12.718               | 67484827          | 1912216           | 50.91         |
| 2    | 24.702               | 65075520          | 933310            | 49.09         |

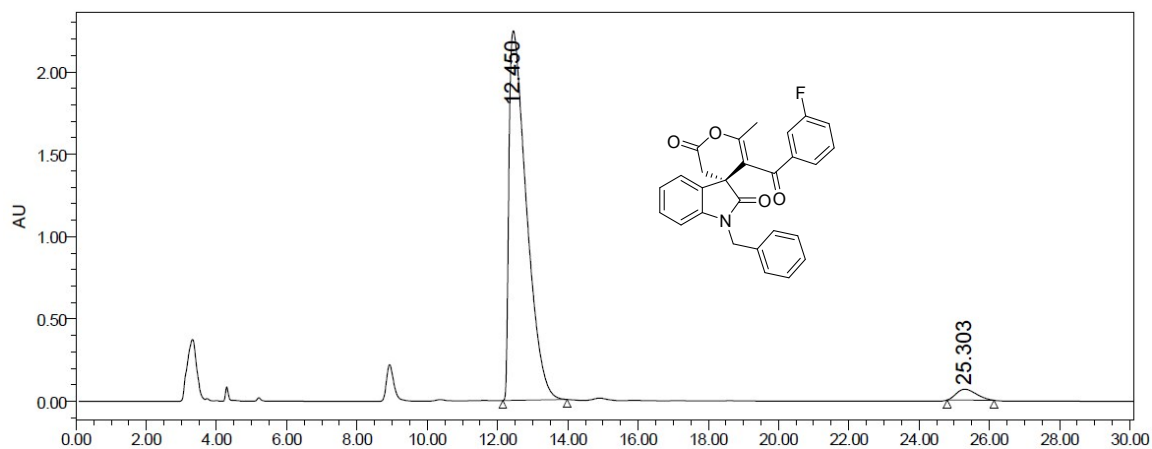

| Peak | Retention time (min) | Peak area (mAU*s) | Peak height (mAU) | Peak area (%) |
|------|----------------------|-------------------|-------------------|---------------|
| 1    | 12.450               | 77241562          | 2242993           | 96.75         |
| 2    | 25.303               | 2595578           | 65729             | 3.25          |

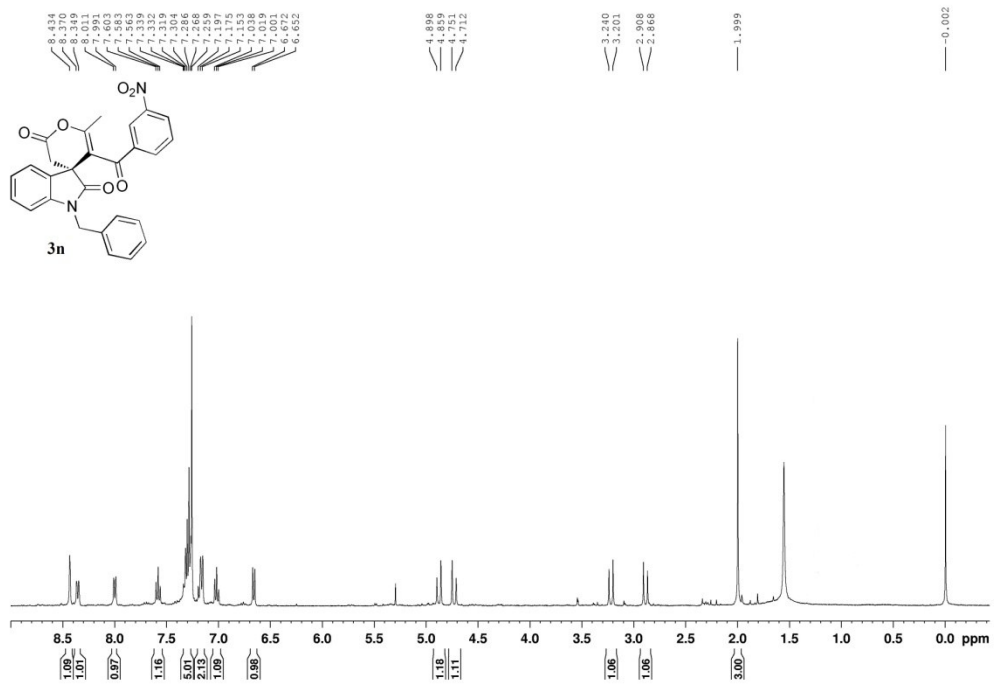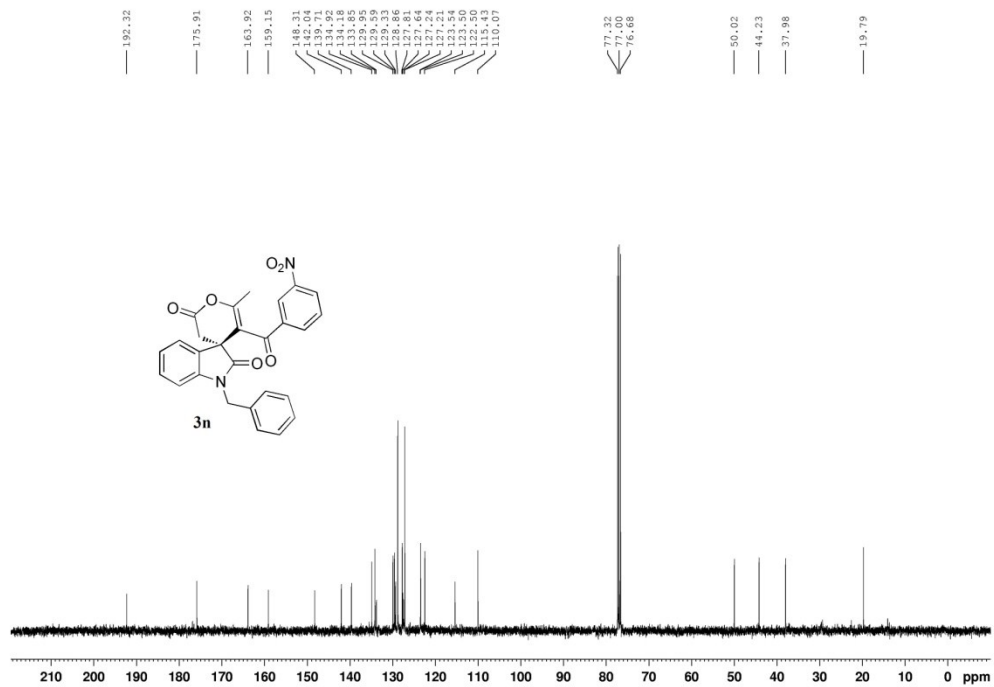



HPLC analysis of **3n** using chiral IC Column (CH<sub>2</sub>Cl<sub>2</sub>: *n*-hexane = 65:35, 1.0 mL/min)

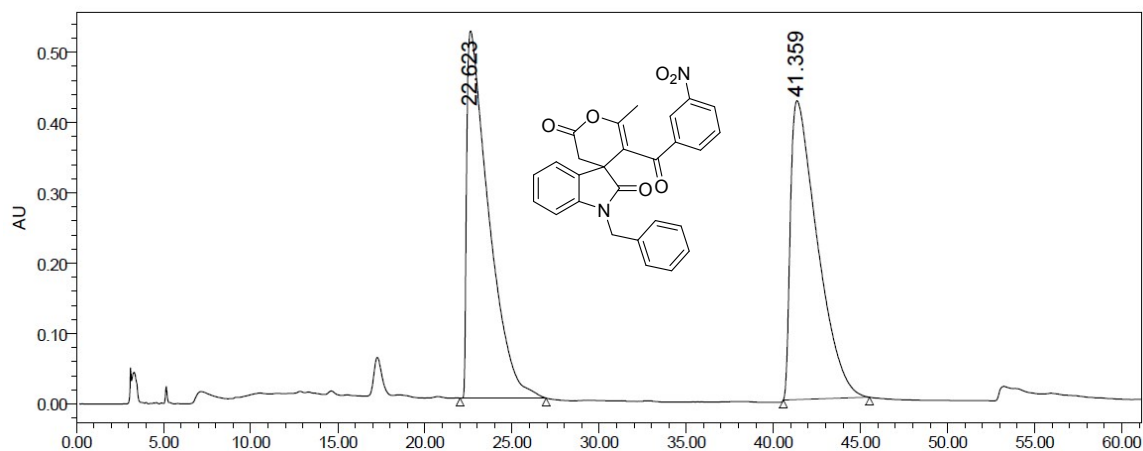

| Peak | Retention time (min) | Peak area (mAU*s) | Peak height (mAU) | Peak area (%) |
|------|----------------------|-------------------|-------------------|---------------|
| 1    | 22.623               | 45565661          | 521863            | 50.00         |
| 2    | 41.359               | 45556734          | 425066            | 50.00         |

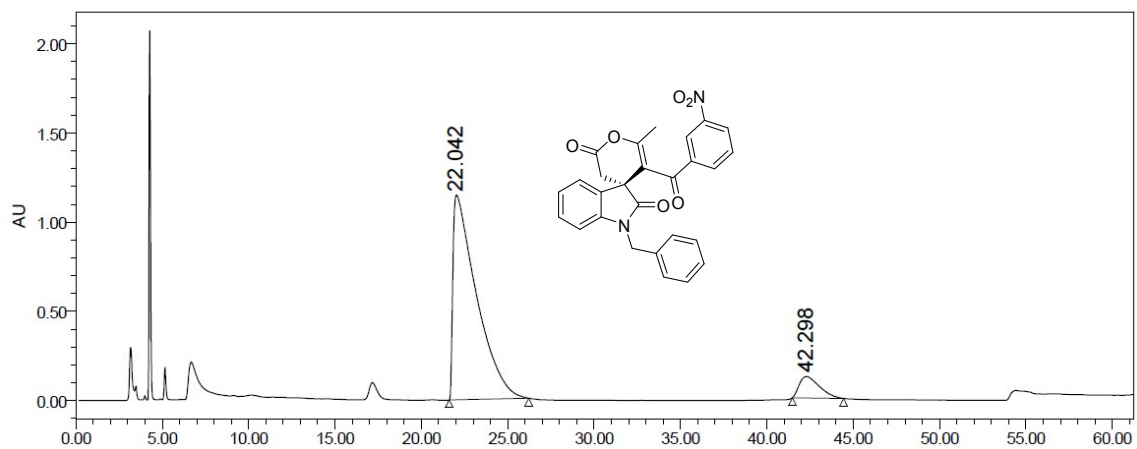

| Peak | Retention time (min) | Peak area (mAU*s) | Peak height (mAU) | Peak area (%) |
|------|----------------------|-------------------|-------------------|---------------|
| 1    | 22.042               | 108776004         | 1148345           | 91.78         |
| 2    | 42.298               | 9744592           | 120534            | 8.22          |

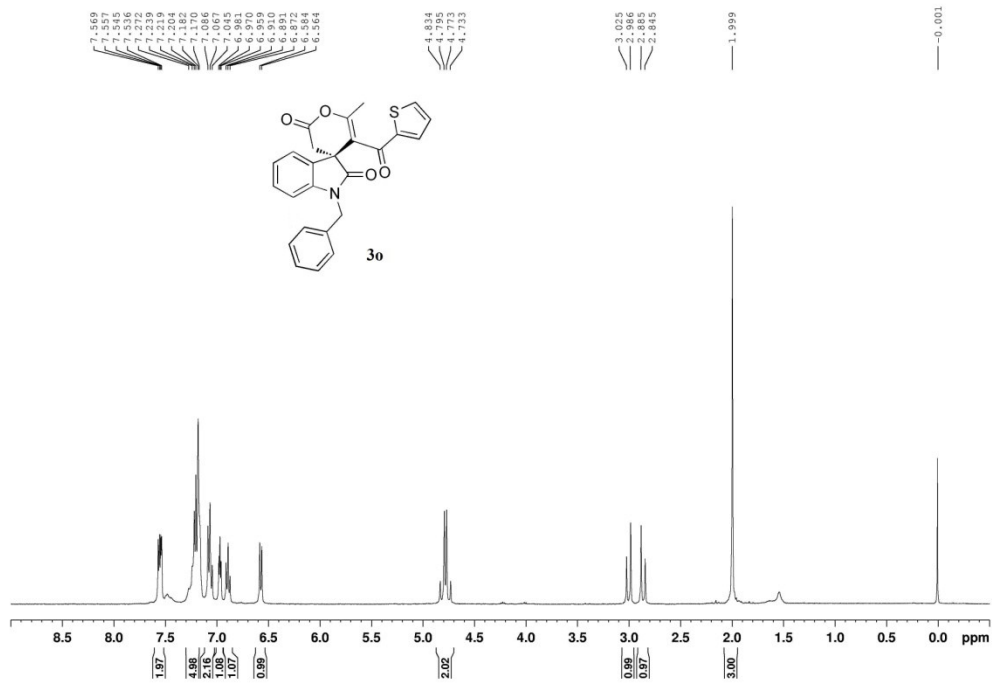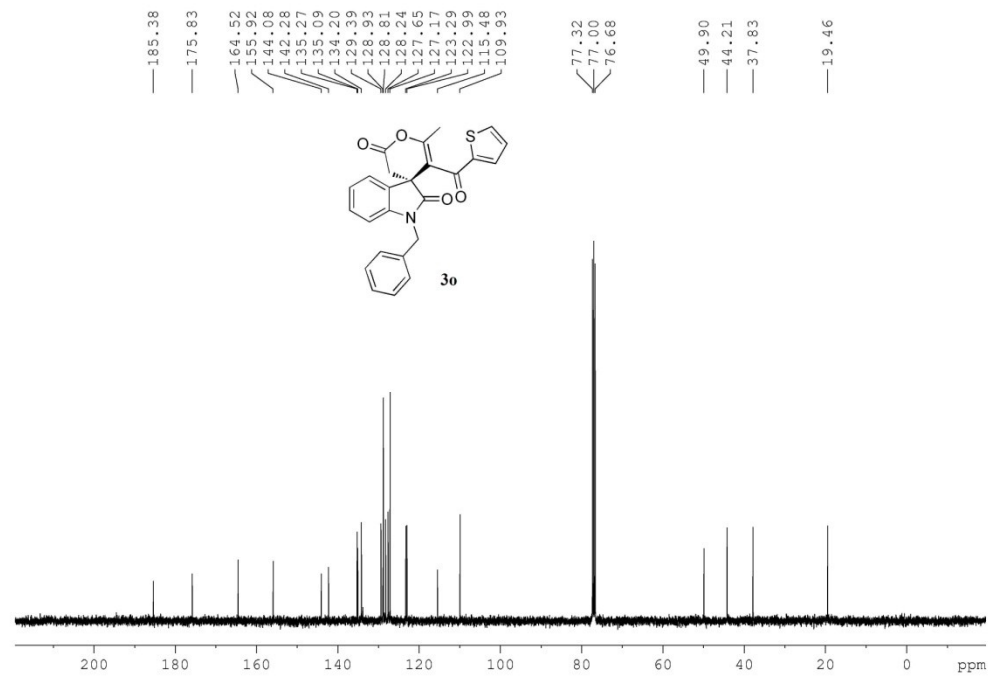

HPLC analysis of **3o** using chiral IC Column (CH<sub>2</sub>Cl<sub>2</sub>: *n*-hexane = 90:10, 1.0 mL/min)

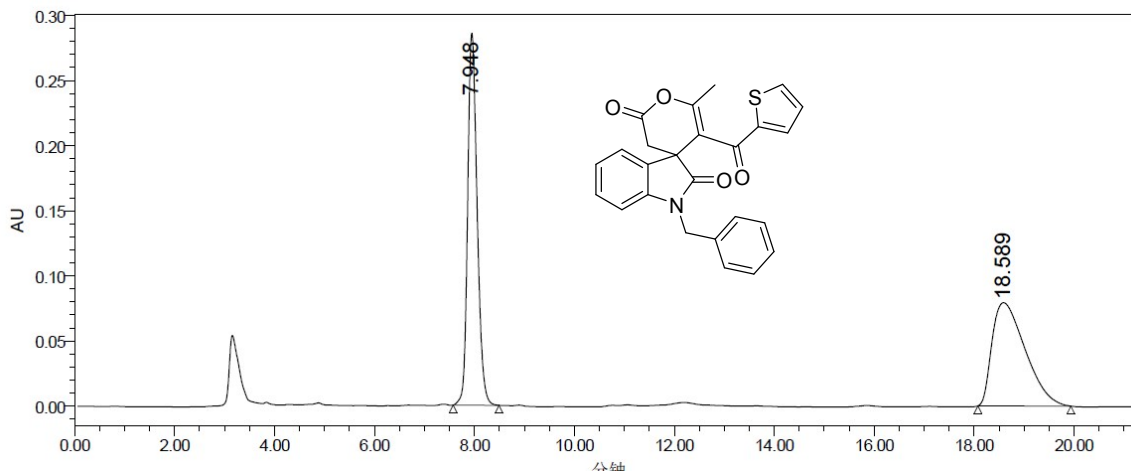

| Peak | Retention time (min) | Peak area (mAU*s) | Peak height (mAU) | Peak area (%) |
|------|----------------------|-------------------|-------------------|---------------|
| 1    | 7.948                | 3752145           | 285635            | 50.72         |
| 2    | 18.589               | 3645622           | 79237             | 49.28         |

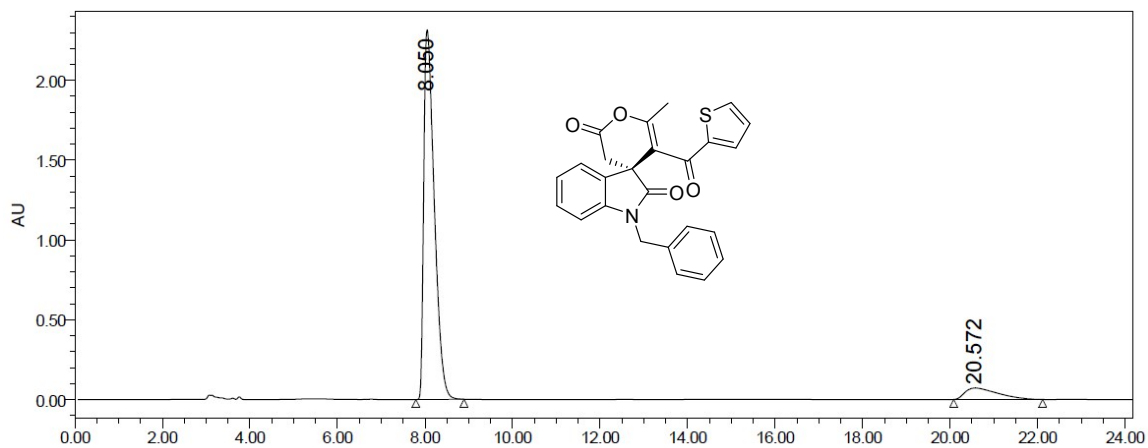

| Peak | Retention time (min) | Peak area (mAU*s) | Peak height (mAU) | Peak area (%) |
|------|----------------------|-------------------|-------------------|---------------|
| 1    | 8.050                | 38659121          | 2316413           | 91.25         |
| 2    | 20.572               | 3705882           | 71414             | 8.75          |

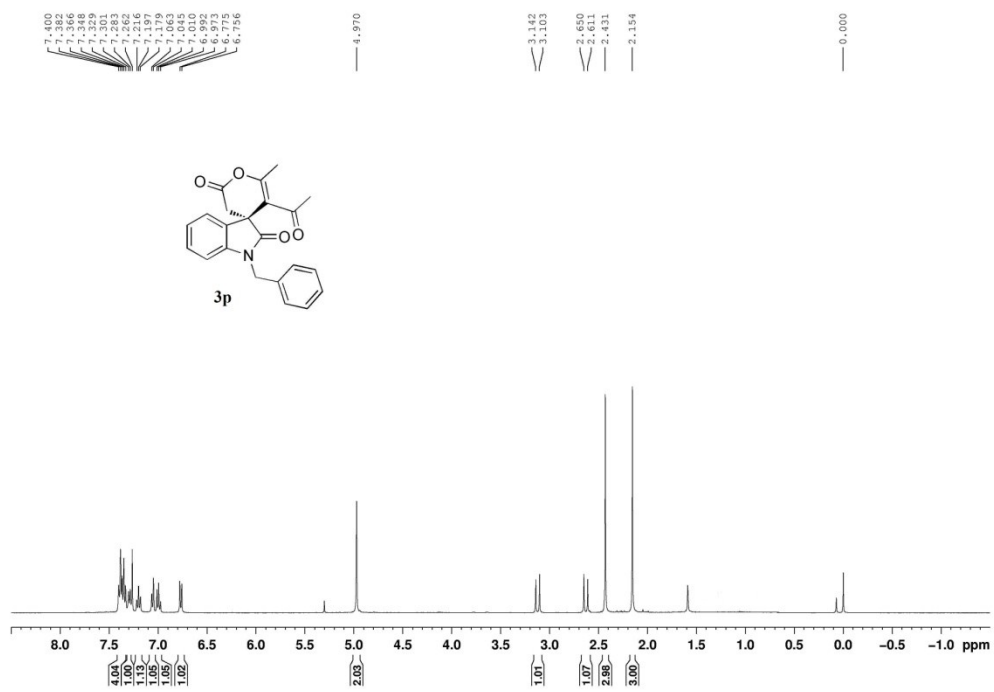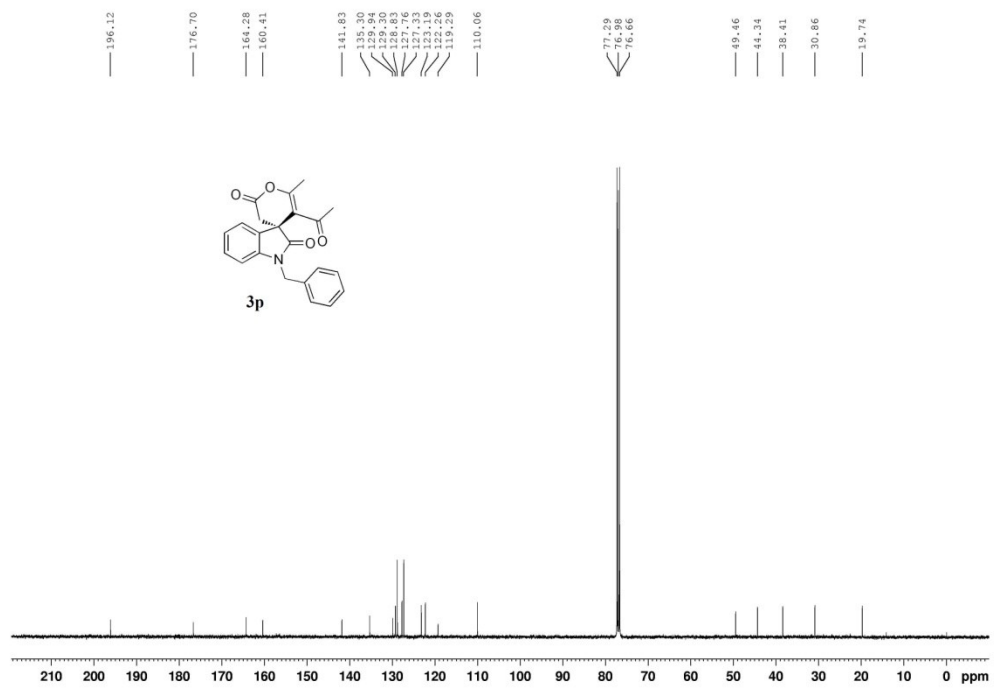

HPLC analysis of **3p** using chiral IC Column (CH<sub>2</sub>Cl<sub>2</sub>: *n*-hexane = 90:10, 1.0 mL/min)

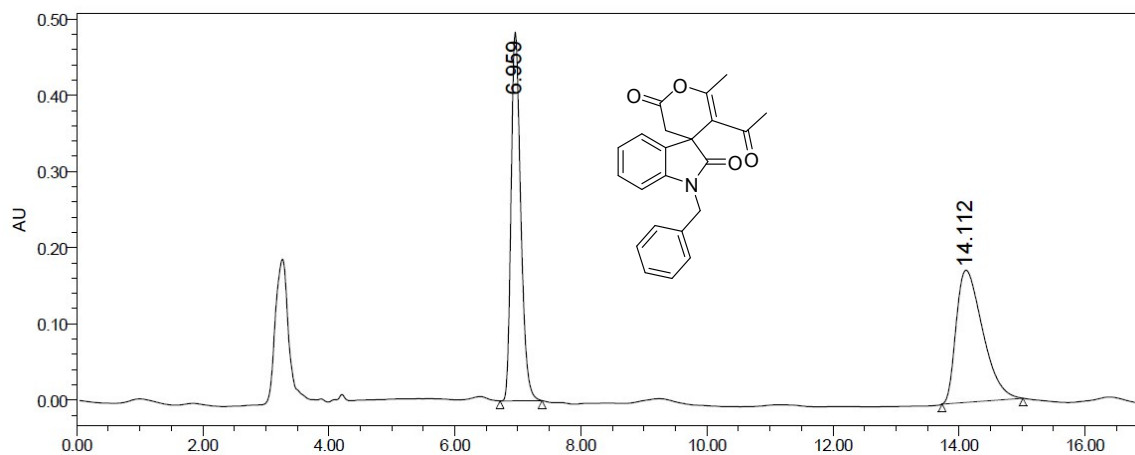

| Peak | Retention time (min) | Peak area (mAU*s) | Peak height (mAU) | Peak area (%) |
|------|----------------------|-------------------|-------------------|---------------|
| 1    | 6.959                | 5134957           | 483882            | 50.31         |
| 2    | 14.112               | 5072403           | 173597            | 49.69         |

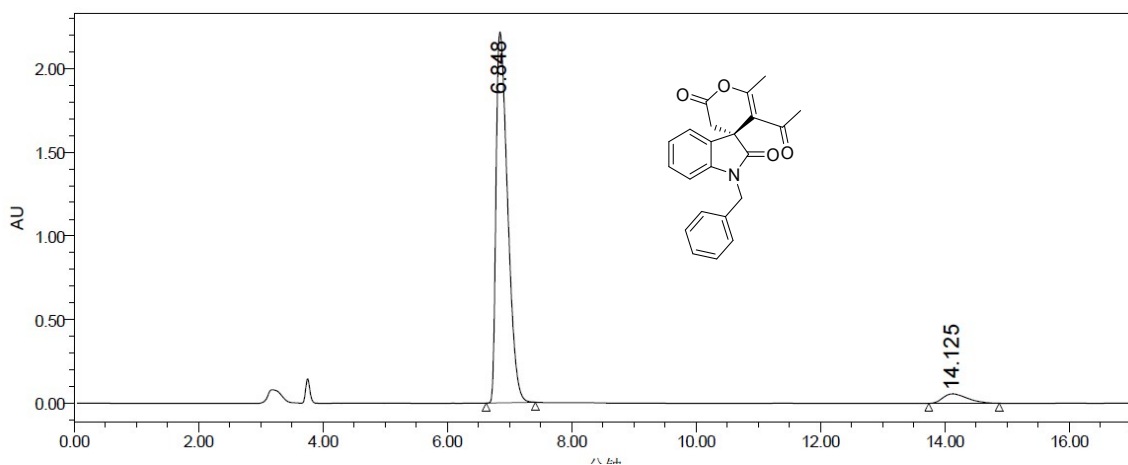

| Peak | Retention time (min) | Peak area (mAU*s) | Peak height (mAU) | Peak area (%) |
|------|----------------------|-------------------|-------------------|---------------|
| 1    | 6.848                | 28578656          | 2216712           | 94.91         |
| 2    | 14.125               | 1532598           | 56012             | 5.09          |

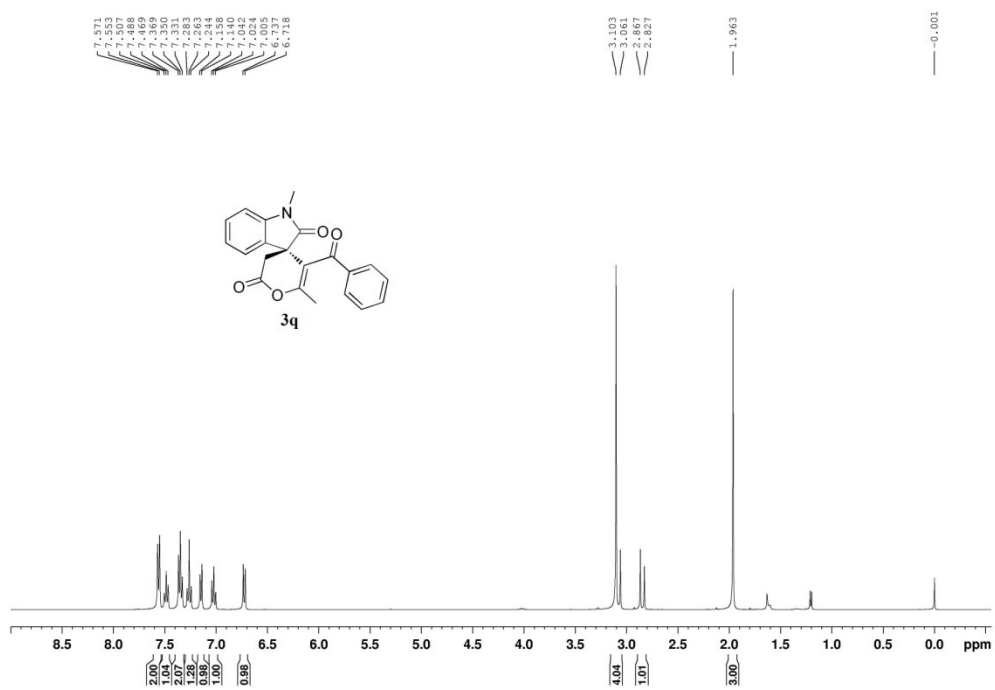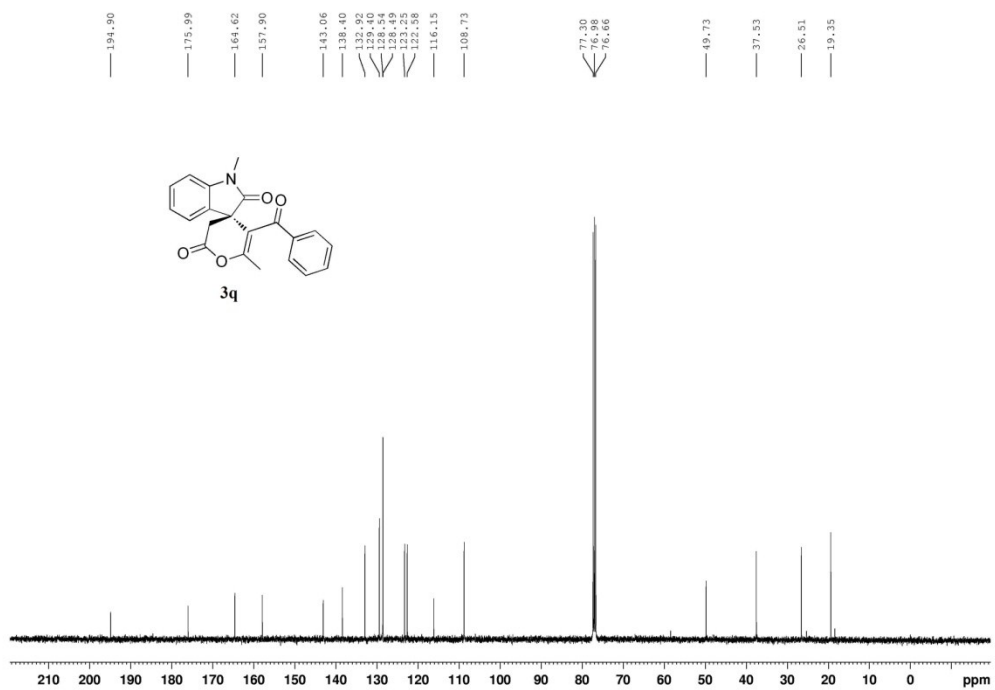

HPLC analysis of **3q** using chiral IC Column (CH<sub>2</sub>Cl<sub>2</sub>: *n*-hexane = 80:20, 1.0 mL/min)

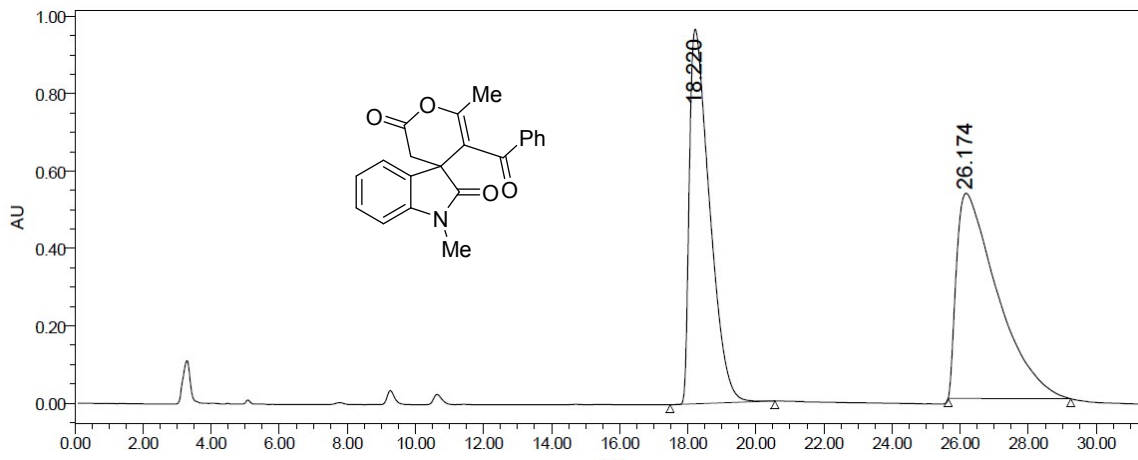

| Peak | Retention time (min) | Peak area (mAU*s) | Peak height (mAU) | Peak area (%) |
|------|----------------------|-------------------|-------------------|---------------|
| 1    | 18.220               | 39863499          | 968068            | 47.34         |
| 2    | 26.174               | 44347396          | 529984            | 52.66         |

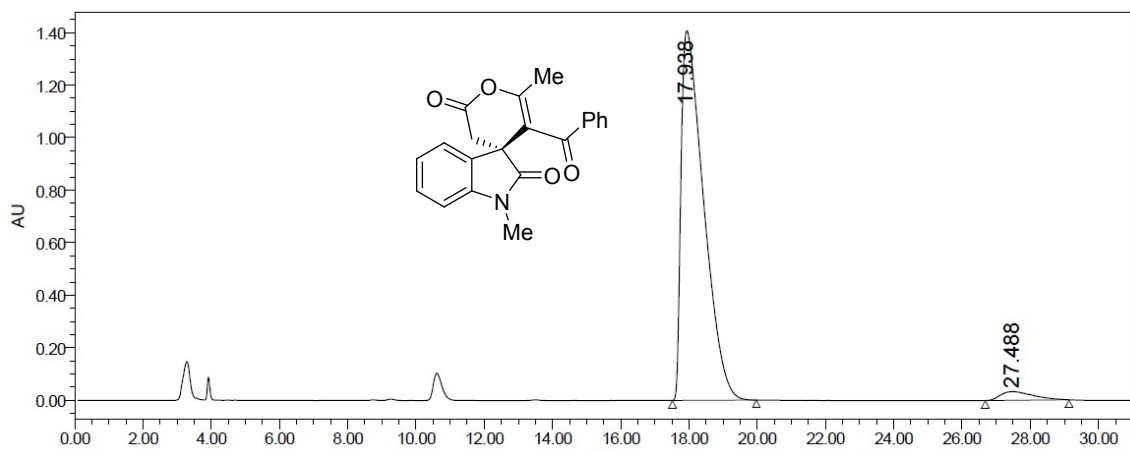

| Peak | Retention time (min) | Peak area (mAU*s) | Peak height (mAU) | Peak area (%) |
|------|----------------------|-------------------|-------------------|---------------|
| 1    | 17.938               | 64653654          | 1407681           | 96.75         |
| 2    | 27.488               | 2175149           | 32950             | 3.25          |

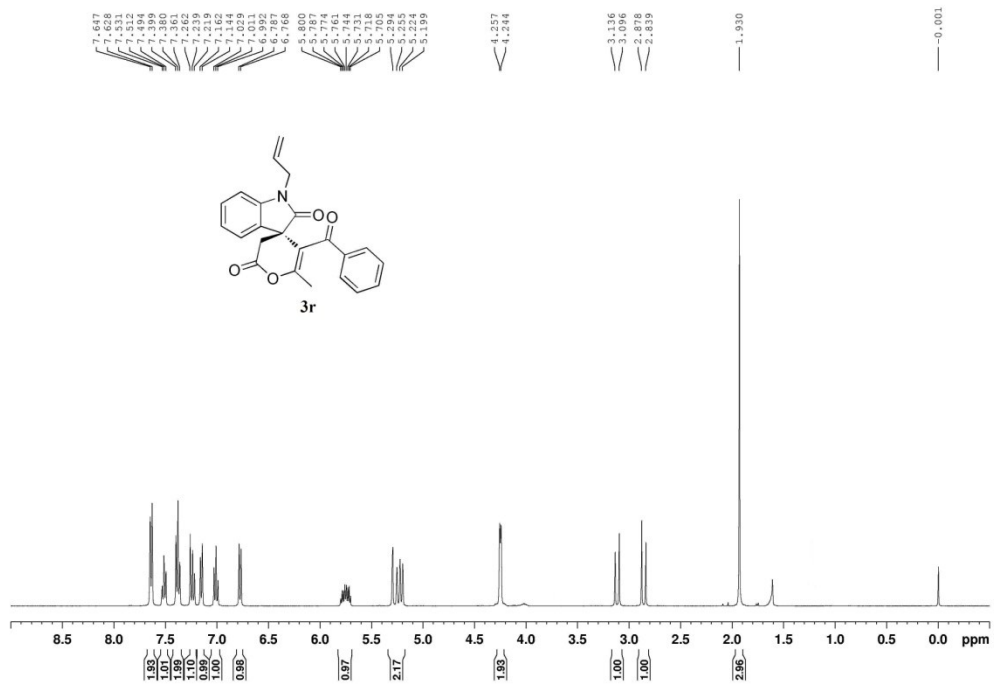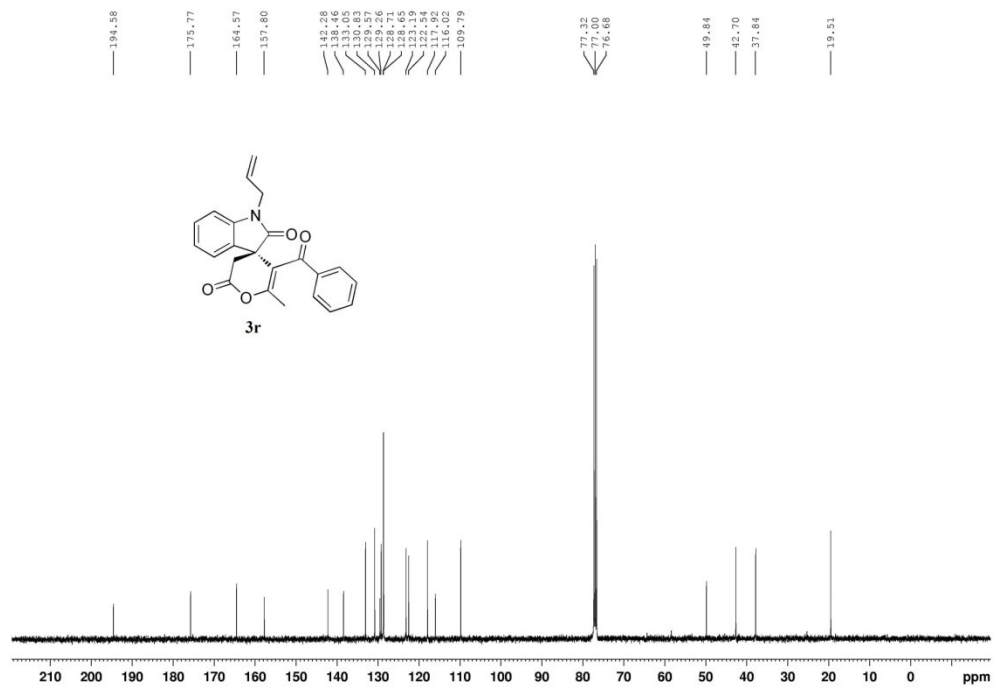



HPLC analysis of **3r** using chiral IC Column (CH<sub>2</sub>Cl<sub>2</sub>: *n*-hexane = 70:30, 1.0 mL/min)

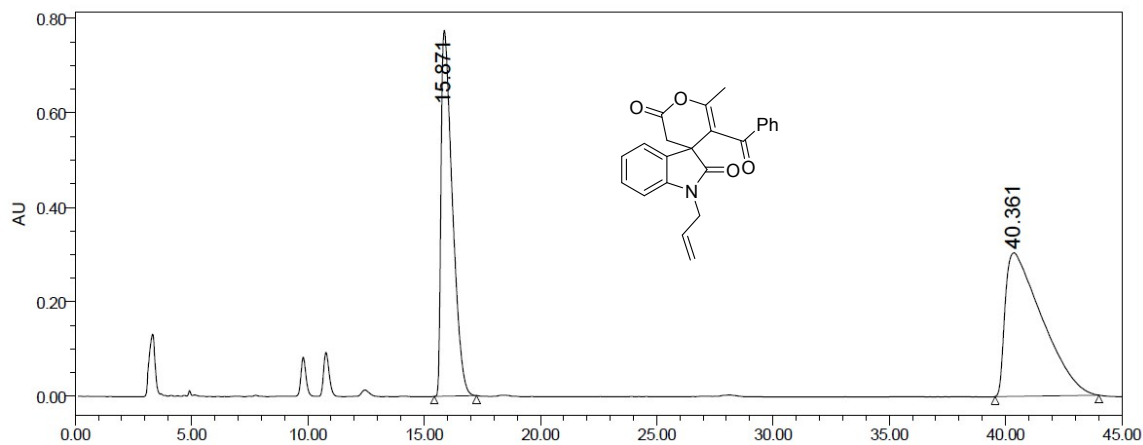

| Peak | Retention time (min) | Peak area (mAU*s) | Peak height (mAU) | Peak area (%) |
|------|----------------------|-------------------|-------------------|---------------|
| 1    | 15.871               | 26192315          | 774314            | 43.91         |
| 2    | 40.361               | 33450996          | 303465            | 56.09         |

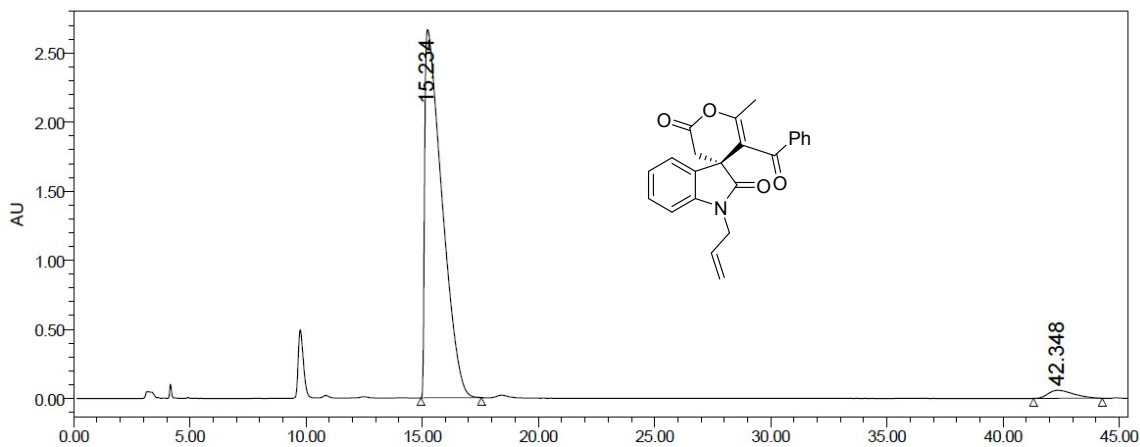

| Peak | Retention time (min) | Peak area (mAU*s) | Peak height (mAU) | Peak area (%) |
|------|----------------------|-------------------|-------------------|---------------|
| 1    | 15.234               | 137389530         | 2664460           | 96.93         |
| 2    | 42.348               | 4358172           | 57947             | 3.07          |

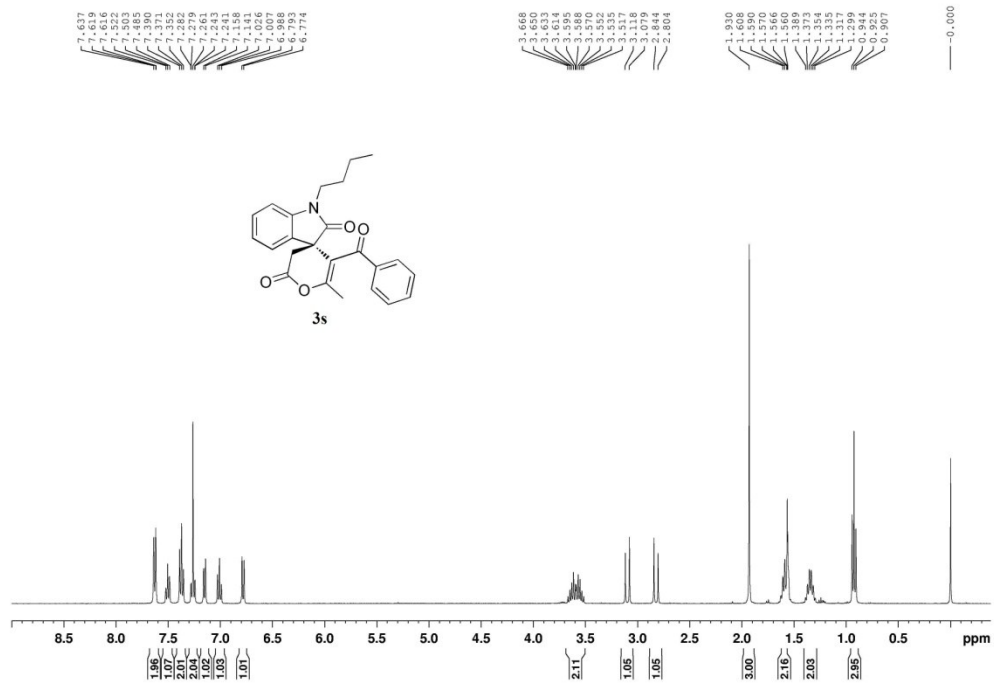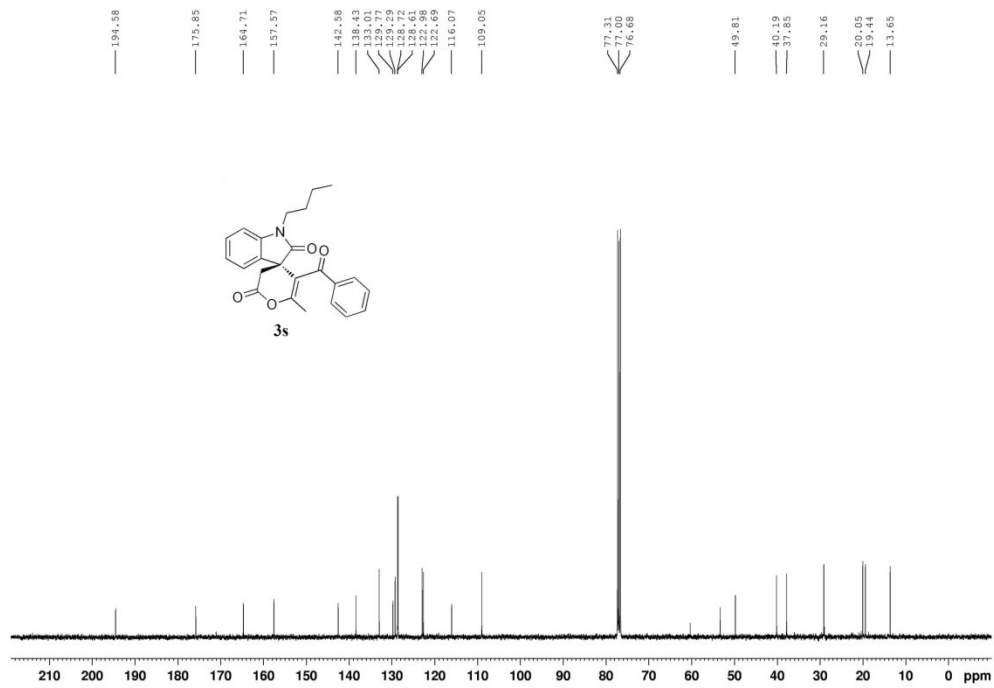

HPLC analysis of **3s** using chiral IC Column (CH<sub>2</sub>Cl<sub>2</sub>: *n*-hexane = 70:30, 1.0 mL/min)

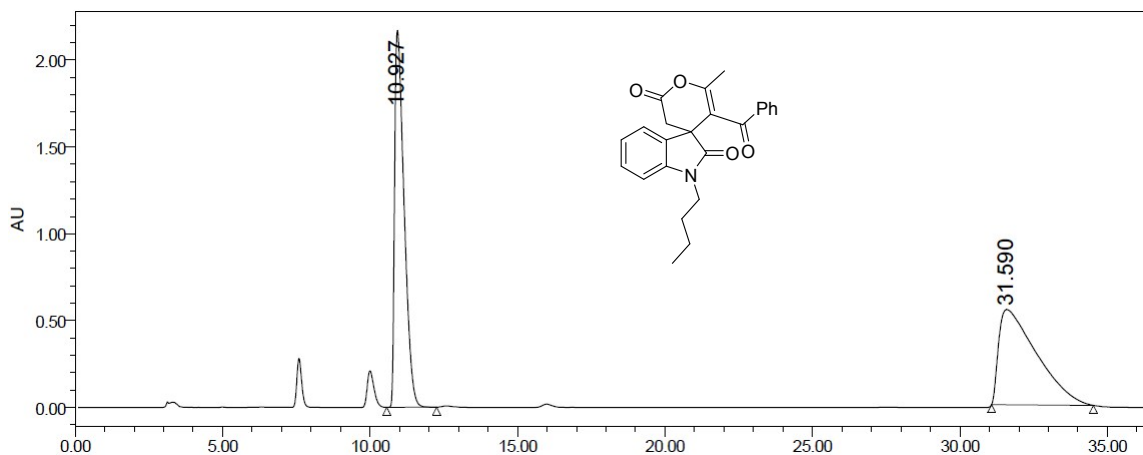

| Peak | Retention time (min) | Peak area (mAU*s) | Peak height (mAU) | Peak area (%) |
|------|----------------------|-------------------|-------------------|---------------|
| 1    | 10.927               | 48593211          | 2169751           | 49.79         |
| 2    | 31.590               | 49010703          | 547279            | 50.21         |

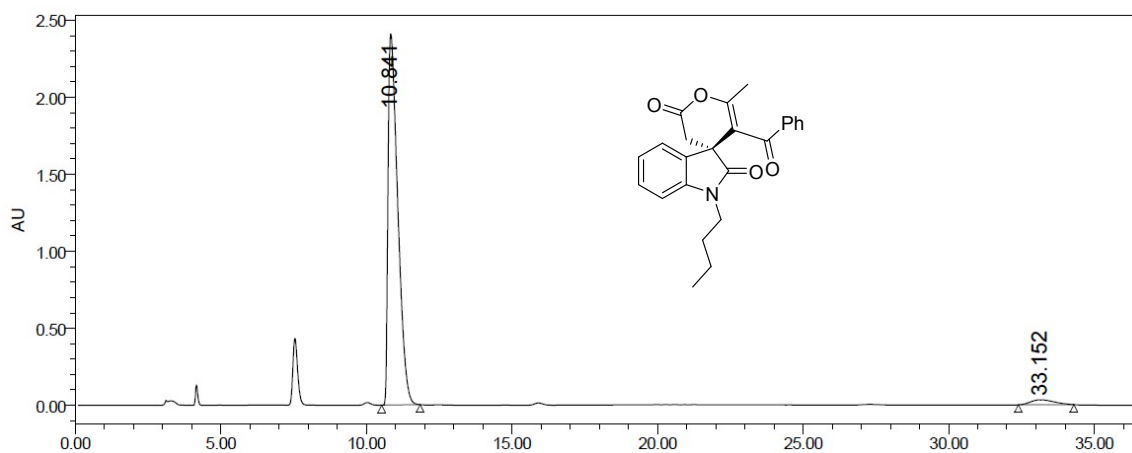

| Peak | Retention time (min) | Peak area (mAU*s) | Peak height (mAU) | Peak area (%) |
|------|----------------------|-------------------|-------------------|---------------|
| 1    | 10.841               | 56031752          | 2409049           | 96.88         |
| 2    | 33.152               | 1803060           | 32520             | 3.12          |



HPLC analysis of **3t** using chiral IC Column (CH<sub>2</sub>Cl<sub>2</sub>: *n*-hexane = 90:10, 1.0 mL/min)

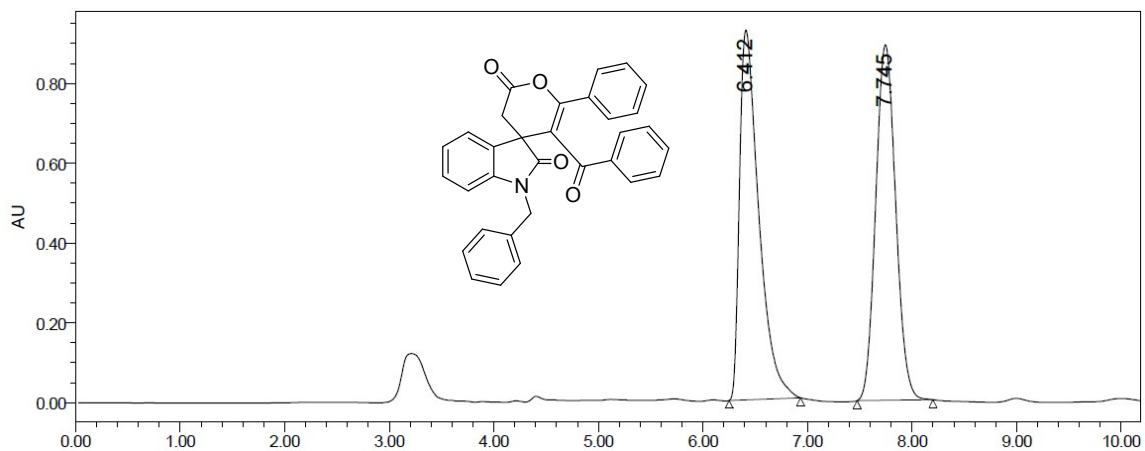

| Peak | Retention time (min) | Peak area (mAU*s) | Peak height (mAU) | Peak area (%) |
|------|----------------------|-------------------|-------------------|---------------|
| 1    | 6.412                | 11892079          | 927533            | 50.20         |
| 2    | 7.745                | 11795620          | 891159            | 49.80         |

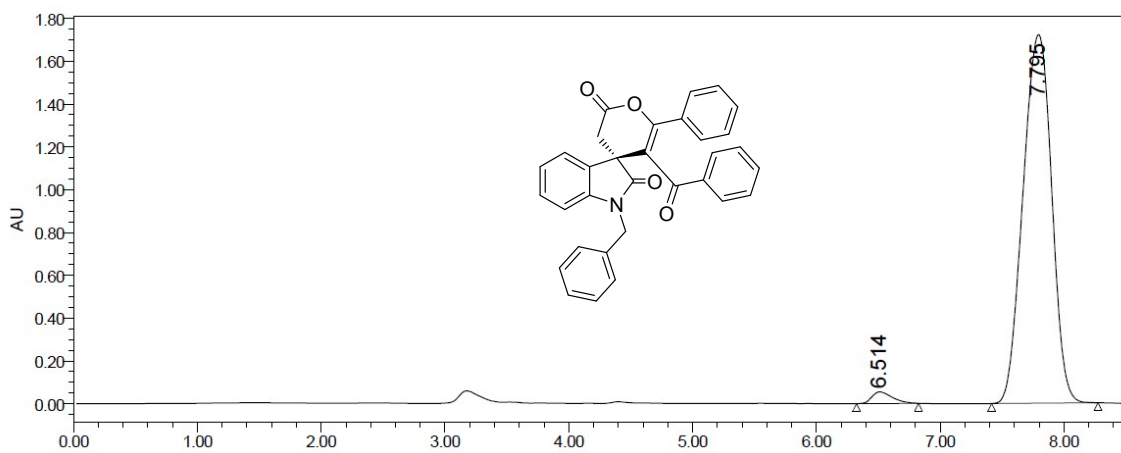

| Peak | Retention time (min) | Peak area (mAU*s) | Peak height (mAU) | Peak area (%) |
|------|----------------------|-------------------|-------------------|---------------|
| 1    | 6.514                | 614896            | 53948             | 2.17          |
| 2    | 7.795                | 27699988          | 1721837           | 97.83         |
